# Supplementary material
Source: Research Square preprint supplement (doi:10.21203/rs.3.rs-9350796/v1)
Supplement: Supplementary file 2 [file 2a5309b5f708281aca4525bb.docx]

Supplementary Software References

This document lists the software and R package references used for analyses.

# Software References

A. R. da Silva, G. Malafaia, and I. P. P. de Menezes. 2017. “biotools: Tools for Biometry and Applied Statistics in Agricultural Science.” *Genetics and Molecular Research* 16. <https://doi.org/10.4238/gmr16029655>.

Aden-Buie, Garrick, Winston Chang, and Barret Schloerke. 2025. *Chromote: Headless Chrome Web Browser Interface*. <https://rstudio.github.io/chromote/>.

Allaire, JJ, Yihui Xie, Christophe Dervieux, Jonathan McPherson, Javier Luraschi, Kevin Ushey, Aron Atkins, et al. 2025. *Rmarkdown: Dynamic Documents for r*. <https://github.com/rstudio/rmarkdown>.

Auguie, Baptiste. 2017. *gridExtra: Miscellaneous Functions for "Grid" Graphics*. <https://doi.org/10.32614/CRAN.package.gridExtra>.

Bache, Stefan Milton, and Hadley Wickham. 2025. *Magrittr: A Forward-Pipe Operator for r*. <https://magrittr.tidyverse.org>.

Bartoń, Kamil. 2025. *MuMIn: Multi-Model Inference*. <https://doi.org/10.32614/CRAN.package.MuMIn>.

Bates, Douglas, Martin Mächler, Ben Bolker, and Steve Walker. 2015. “Fitting Linear Mixed-Effects Models Using lme4.” *Journal of Statistical Software* 67 (1): 1–48. <https://doi.org/10.18637/jss.v067.i01>.

Bates, Douglas, Martin Maechler, Ben Bolker, and Steven Walker. 2025. *Lme4: Linear Mixed-Effects Models Using Eigen and S4*. <https://github.com/lme4/lme4/>.

Bates, Douglas, Martin Maechler, and Mikael Jagan. 2025. *Matrix: Sparse and Dense Matrix Classes and Methods*. <https://Matrix.R-forge.R-project.org>.

Benito, Blas M. 2025. *spatialRF: Easy Spatial Modeling with Random Forest*. <https://blasbenito.github.io/spatialRF/>.

Bivand, Roger. 2026. *Spdep: Spatial Dependence: Weighting Schemes, Statistics*. <https://github.com/r-spatial/spdep/>.

Bivand, Roger S., Edzer Pebesma, and Virgilio Gomez-Rubio. 2013. *Applied Spatial Data Analysis with R, Second Edition*. Springer, NY. <https://asdar-book.org/>.

Bivand, Roger S., Edzer Pebesma, and Virgilio Gómez-Rubio. 2013. *Applied Spatial Data Analysis with R, Second Edition*. Springer, NY. <https://asdar-book.org/>.

Bivand, Roger, Jakub Nowosad, and Robin Lovelace. 2025. *spData: Datasets for Spatial Analysis*. <https://jakubnowosad.com/spData/>.

Bivand, Roger, and David W. S. Wong. 2018. “Comparing Implementations of Global and Local Indicators of Spatial Association.” *TEST* 27 (3): 716–48. <https://doi.org/10.1007/s11749-018-0599-x>.

Breiman, Leo, Adele Cutler, Andy Liaw, and Matthew Wiener. 2024. *randomForest: Breiman and Cutlers Random Forests for Classification and Regression*. <https://www.stat.berkeley.edu/~breiman/RandomForests/>.

Burchett, Woodrow W., Amanda R. Ellis, Solomon W. Harrar, and Arne C. Bathke. 2017. “Nonparametric Inference for Multivariate Data: The R Package npmv.” *Journal of Statistical Software* 76 (4): 1–18. <https://doi.org/10.18637/jss.v076.i04>.

Burchett, Woodrow, and Amanda Ellis. 2025. *Npmv: Nonparametric Comparison of Multivariate Samples*. <https://doi.org/10.32614/CRAN.package.npmv>.

Champely, Stephane. 2020. *Pwr: Basic Functions for Power Analysis*. <https://github.com/heliosdrm/pwr>.

Chang, Winston. 2025. *Webshot2: Take Screenshots of Web Pages*. <https://rstudio.github.io/webshot2/>.

da Silva, Anderson Rodrigo. 2025a. *Biotools: Tools for Biometry and Applied Statistics in Agricultural Science*. <https://arsilva87.github.io/biotools/>.

———. 2025b. *biotools: Tools for Biometry and Applied Statistics in Agricultural Science*. <https://CRAN.R-project.org/package=biotools>.

Fachada, Nuno. 2025. *Micompr: Multivariate Independent Comparison of Observations*. <https://github.com/nunofachada/micompr>.

Fachada, Nuno, João Rodrigues, Vitor V. Lopes, Rui C. Martins, and Agostinho C. Rosa. 2016. “micompr: An r Package for Multivariate Independent Comparison of Observations.” *The R Journal* 8 (2): 405–20. <https://doi.org/10.32614/RJ-2016-055>.

Fox, John, and Sanford Weisberg. 2019. *An R Companion to Applied Regression*. Third. Thousand Oaks CA: Sage. <https://www.john-fox.ca/Companion/>.

Fox, John, Sanford Weisberg, and Brad Price. 2022. *carData: Companion to Applied Regression Data Sets*. <https://r-forge.r-project.org/projects/car/>.

———. 2024. *Car: Companion to Applied Regression*. <https://r-forge.r-project.org/projects/car/>.

Francois, Romain, Diego Hernangómez, and James Joseph Balamuta. 2026. *Bibtex: Bibtex Parser*. <https://github.com/ropensci/bibtex>.

Garnier, Simon. 2024. *Viridis: Colorblind-Friendly Color Maps for r*. <https://sjmgarnier.github.io/viridis/>.

———. 2026. *viridisLite: Colorblind-Friendly Color Maps (Lite Version)*. <https://sjmgarnier.github.io/viridisLite/>.

Garnier, Simon, Ross, Noam, Rudis, Robert, Camargo, et al. 2024. *viridis(Lite) - Colorblind-Friendly Color Maps for r*. <https://doi.org/10.5281/zenodo.4679423>.

———, et al. 2026. *viridis(Lite) - Colorblind-Friendly Color Maps for r*. <https://doi.org/10.5281/zenodo.4678326>.

Genz, Alan, and Frank Bretz. 2009. *Computation of Multivariate Normal and t Probabilities*. Lecture Notes in Statistics. Heidelberg: Springer-Verlag.

Genz, Alan, Frank Bretz, Tetsuhisa Miwa, Xuefei Mi, and Torsten Hothorn. 2025. *Mvtnorm: Multivariate Normal and t Distributions*. <http://mvtnorm.R-forge.R-project.org>.

Gräler, Benedikt, Edzer Pebesma, and Gerard Heuvelink. 2016. “Spatio-Temporal Interpolation Using Gstat.” *The R Journal* 8: 204–18. <https://journal.r-project.org/articles/RJ-2016-014/index.html>.

Green, Peter, and Catriona MacLeod. 2025. *Simr: Power Analysis for Generalised Linear Mixed Models by Simulation*. <https://github.com/pitakakariki/simr>.

Green, Peter, and Catriona J. MacLeod. 2016. “Simr: An r Package for Power Analysis of Generalised Linear Mixed Models by Simulation.” *Methods in Ecology and Evolution* 7 (4): 493–98. <https://doi.org/10.1111/2041-210X.12504>.

Grolemund, Garrett, and Hadley Wickham. 2011. “Dates and Times Made Easy with lubridate.” *Journal of Statistical Software* 40 (3): 1–25. <https://www.jstatsoft.org/v40/i03/>.

Hasselman, Berend. 2023. *Nleqslv: Solve Systems of Nonlinear Equations*. <https://doi.org/10.32614/CRAN.package.nleqslv>.

Hastie, Trevor. 2025. *Gam: Generalized Additive Models*. <https://doi.org/10.32614/CRAN.package.gam>.

Henry, Lionel, and Hadley Wickham. 2026. *Rlang: Functions for Base Types and Core r and Tidyverse Features*. <https://rlang.r-lib.org>.

HERVE, Maxime. 2025. *RVAideMemoire: Testing and Plotting Procedures for Biostatistics*. <https://doi.org/10.32614/CRAN.package.RVAideMemoire>.

Hijmans, Robert J. 2026. *Terra: Spatial Data Analysis*. <https://rspatial.org/>.

Horikoshi, Masaaki, and Yuan Tang. 2018. *Ggfortify: Data Visualization Tools for Statistical Analysis Results*. <https://CRAN.R-project.org/package=ggfortify>.

———. 2025. *Ggfortify: Data Visualization Tools for Statistical Analysis Results*. <https://github.com/sinhrks/ggfortify>.

Hothorn, Torsten. 2025. *TH.data: TH’s Data Archive*. <https://doi.org/10.32614/CRAN.package.TH.data>.

Hothorn, Torsten, Frank Bretz, and Peter Westfall. 2008. “Simultaneous Inference in General Parametric Models.” *Biometrical Journal* 50 (3): 346–63.

———. 2025. *Multcomp: Simultaneous Inference in General Parametric Models*. <http://multcomp.R-forge.R-project.org>.

Hothorn, Torsten, Kurt Hornik, Mark A. van de Wiel, and Achim Zeileis. 2006. “A Lego System for Conditional Inference.” *The American Statistician* 60 (3): 257–63. <https://doi.org/10.1198/000313006X118430>.

———. 2008. “Implementing a Class of Permutation Tests: The coin Package.” *Journal of Statistical Software* 28 (8): 1–23. <https://doi.org/10.18637/jss.v028.i08>.

Hothorn, Torsten, Henric Winell, Kurt Hornik, Mark A. van de Wiel, and Achim Zeileis. 2023. *Coin: Conditional Inference Procedures in a Permutation Test Framework*. <http://coin.r-forge.r-project.org>.

Hothorn, Torsten, Achim Zeileis, Richard W. Farebrother, and Clint Cummins. 2022. *Lmtest: Testing Linear Regression Models*. <https://doi.org/10.32614/CRAN.package.lmtest>.

Iannone, Richard, Joe Cheng, Barret Schloerke, Shannon Haughton, Ellis Hughes, Alexandra Lauer, Romain François, JooYoung Seo, Ken Brevoort, and Olivier Roy. 2026. *Gt: Easily Create Presentation-Ready Display Tables*. <https://gt.rstudio.com>.

Kassambara, Alboukadel. 2025a. *Ggpubr: Ggplot2 Based Publication Ready Plots*. <https://rpkgs.datanovia.com/ggpubr/>.

———. 2025b. *Rstatix: Pipe-Friendly Framework for Basic Statistical Tests*. <https://rpkgs.datanovia.com/rstatix/>.

Korkmaz, Selcuk, Dincer Goksuluk, and Gokmen Zararsiz. 2014. “MVN: An r Package for Assessing Multivariate Normality.” *The R Journal* 6 (2): 151–62. <https://journal.r-project.org/articles/RJ-2014-031/RJ-2014-031.pdf>.

———. 2026. *MVN: Multivariate Normality Tests*. <https://biosoft.shinyapps.io/mvn-shiny-app/>.

Kuznetsova, Alexandra, Per B. Brockhoff, and Rune H. B. Christensen. 2017. “lmerTest Package: Tests in Linear Mixed Effects Models.” *Journal of Statistical Software* 82 (13): 1–26. <https://doi.org/10.18637/jss.v082.i13>.

Kuznetsova, Alexandra, Per Bruun Brockhoff, and Rune Haubo Bojesen Christensen. 2026. *lmerTest: Tests in Linear Mixed Effects Models*. <https://github.com/runehaubo/lmerTestR>.

Lenth, Russell V., and Julia Piaskowski. 2025. *Emmeans: Estimated Marginal Means, Aka Least-Squares Means*. <https://rvlenth.github.io/emmeans/>.

Liaw, Andy, and Matthew Wiener. 2002. “Classification and Regression by randomForest.” *R News* 2 (3): 18–22. <https://CRAN.R-project.org/doc/Rnews/>.

Lüdecke, Daniel. 2018. “Ggeffects: Tidy Data Frames of Marginal Effects from Regression Models.” *Journal of Open Source Software* 3 (26): 772. <https://doi.org/10.21105/joss.00772>.

———. 2025. *Ggeffects: Create Tidy Data Frames of Marginal Effects for Ggplot from Model Outputs*. <https://strengejacke.github.io/ggeffects/>.

Lüdecke, Daniel, Mattan S. Ben-Shachar, Indrajeet Patil, Philip Waggoner, and Dominique Makowski. 2021. “performance: An R Package for Assessment, Comparison and Testing of Statistical Models.” *Journal of Open Source Software* 6 (60): 3139. <https://doi.org/10.21105/joss.03139>.

Lüdecke, Daniel, Dominique Makowski, Mattan S. Ben-Shachar, Indrajeet Patil, Philip Waggoner, Brenton M. Wiernik, and Rémi Thériault. 2026. *Performance: Assessment of Regression Models Performance*. <https://easystats.github.io/performance/>.

Makowski, Dominique, Daniel Lüdecke, Indrajeet Patil, Rémi Thériault, Mattan S. Ben-Shachar, and Brenton M. Wiernik. 2023. “Automated Results Reporting as a Practical Tool to Improve Reproducibility and Methodological Best Practices Adoption.” *CRAN*. <https://doi.org/10.32614/CRAN.package.report>.

———. 2026. *Report: Automated Reporting of Results and Statistical Models*. <https://easystats.github.io/report/>.

Microsoft, and Steve Weston. 2022. *Foreach: Provides Foreach Looping Construct*. <https://github.com/RevolutionAnalytics/foreach>.

Müller, Kirill, and Hadley Wickham. 2026. *Tibble: Simple Data Frames*. <https://tibble.tidyverse.org/>.

Oksanen, Jari, Gavin L. Simpson, F. Guillaume Blanchet, Roeland Kindt, Pierre Legendre, Peter R. Minchin, R. B. O’Hara, et al. 2025. *Vegan: Community Ecology Package*. <https://vegandevs.github.io/vegan/>.

Ooms, Jeroen. 2025. *Magick: Advanced Graphics and Image-Processing in r*. <https://docs.ropensci.org/magick/>.

Pebesma, Edzer. 2018. “Simple Features for R: Standardized Support for Spatial Vector Data.” *The R Journal* 10 (1): 439–46. <https://doi.org/10.32614/RJ-2018-009>.

———. 2026. *Sf: Simple Features for r*. <https://r-spatial.github.io/sf/>.

Pebesma, Edzer J. 2004. “Multivariable Geostatistics in S: The Gstat Package.” *Computers & Geosciences* 30: 683–91. <https://doi.org/10.1016/j.cageo.2004.03.012>.

Pebesma, Edzer J., and Roger Bivand. 2005. “Classes and Methods for Spatial Data in R.” *R News* 5 (2): 9–13. <https://CRAN.R-project.org/doc/Rnews/>.

Pebesma, Edzer, and Roger Bivand. 2023a. *Spatial Data Science: With applications in R*. Chapman and Hall/CRC. <https://doi.org/10.1201/9780429459016>.

———. 2025. *Sp: Classes and Methods for Spatial Data*. <https://github.com/edzer/sp/>.

Pebesma, Edzer, and Roger S. Bivand. 2023b. *Spatial Data Science with Applications in R*. Chapman & Hall. <https://r-spatial.org/book/>.

Pebesma, Edzer, and Benedikt Graeler. 2026. *Gstat: Spatial and Spatio-Temporal Geostatistical Modelling, Prediction and Simulation*. <https://github.com/r-spatial/gstat/>.

Pebesma, Edzer, Thomas Mailund, and James Hiebert. 2016. “Measurement Units in R.” *R Journal* 8 (2): 486–94. <https://doi.org/10.32614/RJ-2016-061>.

Pebesma, Edzer, Thomas Mailund, Tomasz Kalinowski, and Iñaki Ucar. 2025. *Units: Measurement Units for r Vectors*. <https://r-quantities.github.io/units/>.

Pedersen, Thomas Lin. 2025. *Patchwork: The Composer of Plots*. <https://patchwork.data-imaginist.com>.

Pinheiro, José C., and Douglas M. Bates. 2000. *Mixed-Effects Models in s and s-PLUS*. New York: Springer. <https://doi.org/10.1007/b98882>.

Pinheiro, José, Douglas Bates, and R Core Team. 2025. *Nlme: Linear and Nonlinear Mixed Effects Models*. <https://svn.r-project.org/R-packages/trunk/nlme/>.

Qiu, Weiliang, Jorge Chavarro, Ross Lazarus, Bernard Rosner, and Jing Ma. 2025. *powerSurvEpi: Power and Sample Size Calculation for Survival Analysis of Epidemiological Studies*. <https://doi.org/10.32614/CRAN.package.powerSurvEpi>.

Ripley, Brian, and Bill Venables. 2025. *MASS: Support Functions and Datasets for Venables and Ripley’s MASS*. <http://www.stats.ox.ac.uk/pub/MASS4/>.

Roger Bivand. 2022. “R Packages for Analyzing Spatial Data: A Comparative Case Study with Areal Data.” *Geographical Analysis* 54 (3): 488–518. <https://doi.org/10.1111/gean.12319>.

Sarkar, Deepayan. 2008. *Lattice: Multivariate Data Visualization with r*. New York: Springer. <http://lmdvr.r-forge.r-project.org>.

———. 2025. *Lattice: Trellis Graphics for r*. <https://lattice.r-forge.r-project.org/>.

Sievert, Carson. 2020. *Interactive Web-Based Data Visualization with r, Plotly, and Shiny*. Chapman; Hall/CRC. <https://plotly-r.com>.

Sievert, Carson, Chris Parmer, Toby Hocking, Scott Chamberlain, Karthik Ram, Marianne Corvellec, and Pedro Despouy. 2025. *Plotly: Create Interactive Web Graphics via Plotly.js*. <https://plotly-r.com>.

Simpson, Gavin L. 2024. “gratia: An R Package for Exploring Generalized Additive Models.” *Journal of Open Source Software* 9 (104): 6962. <https://doi.org/10.21105/joss.06962>.

———. 2025a. *Gratia: Graceful Ggplot-Based Graphics and Other Functions for GAMs Fitted Using Mgcv*. <https://gavinsimpson.github.io/gratia/>.

———. 2025b. *Permute: Functions for Generating Restricted Permutations of Data*. <https://github.com/gavinsimpson/permute>.

Slowikowski, Kamil. 2024. *Ggrepel: Automatically Position Non-Overlapping Text Labels with Ggplot2*. <https://ggrepel.slowkow.com/>.

Spinu, Vitalie, Garrett Grolemund, and Hadley Wickham. 2024. *Lubridate: Make Dealing with Dates a Little Easier*. <https://lubridate.tidyverse.org>.

Tang, Yuan, Masaaki Horikoshi, and Wenxuan Li. 2016. “Ggfortify: Unified Interface to Visualize Statistical Result of Popular r Packages.” *The R Journal* 8 (2): 474–85. <https://doi.org/10.32614/RJ-2016-060>.

Terry M. Therneau, and Patricia M. Grambsch. 2000. *Modeling Survival Data: Extending the Cox Model*. New York: Springer.

Therneau, Terry M. 2024. *Survival: Survival Analysis*. <https://github.com/therneau/survival>.

Valavi, Roozbeh, Jane Elith, José J. Lahoz-Monfort, and Gurutzeta Guillera-Arroita. 2019. “blockCV: An r Package for Generating Spatially or Environmentally Separated Folds for k-Fold Cross-Validation of Species Distribution Models.” *Methods in Ecology and Evolution* 10 (2): 225–32. <https://doi.org/10.1111/2041-210X.13107>.

Valavi, Roozbeh, Jane Elith, José Lahoz-Monfort, Ian Flint, and Gurutzeta Guillera-Arroita. 2025. *blockCV: Spatial and Environmental Blocking for k-Fold and LOO Cross-Validation*. <https://github.com/rvalavi/blockCV>.

Venables, W. N., and B. D. Ripley. 2002. *Modern Applied Statistics with s*. Fourth. New York: Springer. <https://www.stats.ox.ac.uk/pub/MASS4/>.

Walker, Kyle. 2025. *Tigris: Load Census TIGER/Line Shapefiles*. <https://github.com/walkerke/tigris>.

Wickham, Hadley. 2011. “The Split-Apply-Combine Strategy for Data Analysis.” *Journal of Statistical Software* 40 (1): 1–29. <https://www.jstatsoft.org/v40/i01/>.

———. 2016. *Ggplot2: Elegant Graphics for Data Analysis*. Springer-Verlag New York. <https://ggplot2.tidyverse.org>.

———. 2023a. *Plyr: Tools for Splitting, Applying and Combining Data*. <http://had.co.nz/plyr>.

———. 2023b. *Tidyverse: Easily Install and Load the Tidyverse*. <https://tidyverse.tidyverse.org>.

———. 2025a. *Forcats: Tools for Working with Categorical Variables (Factors)*. <https://forcats.tidyverse.org/>.

———. 2025b. *Stringr: Simple, Consistent Wrappers for Common String Operations*. <https://stringr.tidyverse.org>.

Wickham, Hadley, Mara Averick, Jennifer Bryan, Winston Chang, Lucy D’Agostino McGowan, Romain François, Garrett Grolemund, et al. 2019. “Welcome to the tidyverse.” *Journal of Open Source Software* 4 (43): 1686. <https://doi.org/10.21105/joss.01686>.

Wickham, Hadley, Winston Chang, Lionel Henry, Thomas Lin Pedersen, Kohske Takahashi, Claus Wilke, Kara Woo, Hiroaki Yutani, Dewey Dunnington, and Teun van den Brand. 2025. *Ggplot2: Create Elegant Data Visualisations Using the Grammar of Graphics*. <https://ggplot2.tidyverse.org>.

Wickham, Hadley, Romain François, Lionel Henry, Kirill Müller, and Davis Vaughan. 2023. *Dplyr: A Grammar of Data Manipulation*. <https://dplyr.tidyverse.org>.

Wickham, Hadley, and Lionel Henry. 2026. *Purrr: Functional Programming Tools*. <https://purrr.tidyverse.org/>.

Wickham, Hadley, Jim Hester, and Jennifer Bryan. 2025. *Readr: Read Rectangular Text Data*. <https://readr.tidyverse.org>.

Wickham, Hadley, Thomas Lin Pedersen, and Dana Seidel. 2025. *Scales: Scale Functions for Visualization*. <https://scales.r-lib.org>.

Wickham, Hadley, Davis Vaughan, and Maximilian Girlich. 2025. *Tidyr: Tidy Messy Data*. <https://tidyr.tidyverse.org>.

Wood, S. N. 2003. “Thin-Plate Regression Splines.” *Journal of the Royal Statistical Society (B)* 65 (1): 95–114. <https://doi.org/10.1111/1467-9868.00374>.

———. 2004. “Stable and Efficient Multiple Smoothing Parameter Estimation for Generalized Additive Models.” *Journal of the American Statistical Association* 99 (467): 673–86. <https://doi.org/10.1198/016214504000000980>.

———. 2011. “Fast Stable Restricted Maximum Likelihood and Marginal Likelihood Estimation of Semiparametric Generalized Linear Models.” *Journal of the Royal Statistical Society (B)* 73 (1): 3–36. <https://doi.org/10.1111/j.1467-9868.2010.00749.x>.

———. 2017. *Generalized Additive Models: An Introduction with R*. 2nd ed. Chapman; Hall/CRC.

Wood, S. N., N. Pya, and B. Säfken. 2016. “Smoothing Parameter and Model Selection for General Smooth Models (with Discussion).” *Journal of the American Statistical Association* 111: 1548–75. <https://doi.org/10.1080/01621459.2016.1180986>.

Wood, Simon. 2025. *Mgcv: Mixed GAM Computation Vehicle with Automatic Smoothness Estimation*. <https://doi.org/10.32614/CRAN.package.mgcv>.

Wright, Marvin N., and Andreas Ziegler. 2017. “ranger: A Fast Implementation of Random Forests for High Dimensional Data in C++ and R.” *Journal of Statistical Software* 77 (1): 1–17. <https://doi.org/10.18637/jss.v077.i01>.

Xie, Yihui. 2014. “Knitr: A Comprehensive Tool for Reproducible Research in R.” In *Implementing Reproducible Computational Research*, edited by Victoria Stodden, Friedrich Leisch, and Roger D. Peng. Chapman; Hall/CRC.

———. 2015. *Dynamic Documents with R and Knitr*. 2nd ed. Boca Raton, Florida: Chapman; Hall/CRC. <https://yihui.org/knitr/>.

———. 2025. *Knitr: A General-Purpose Package for Dynamic Report Generation in r*. <https://yihui.org/knitr/>.

Xie, Yihui, J. J. Allaire, and Garrett Grolemund. 2018. *R Markdown: The Definitive Guide*. Boca Raton, Florida: Chapman; Hall/CRC. <https://bookdown.org/yihui/rmarkdown>.

Xie, Yihui, Christophe Dervieux, and Emily Riederer. 2020. *R Markdown Cookbook*. Boca Raton, Florida: Chapman; Hall/CRC. <https://bookdown.org/yihui/rmarkdown-cookbook>.

Xu, Liang. 2026. *Ggradar2: A Function to Plot a Radar Chart*. <https://www.r-project.org>.

Zeileis, Achim, and Gabor Grothendieck. 2005. “Zoo: S3 Infrastructure for Regular and Irregular Time Series.” *Journal of Statistical Software* 14 (6): 1–27. <https://doi.org/10.18637/jss.v014.i06>.

Zeileis, Achim, Gabor Grothendieck, and Jeffrey A. Ryan. 2025. *Zoo: S3 Infrastructure for Regular and Irregular Time Series (z’s Ordered Observations)*. <https://zoo.R-Forge.R-project.org/>.

Zeileis, Achim, and Torsten Hothorn. 2002. “Diagnostic Checking in Regression Relationships.” *R News* 2 (3): 7–10. <https://CRAN.R-project.org/doc/Rnews/>.

Zhu, Hao. 2024. *kableExtra: Construct Complex Table with Kable and Pipe Syntax*. <http://haozhu233.github.io/kableExtra/>.
