# Supplementary material
Source: Research Square preprint supplement (doi:10.21203/rs.3.rs-9350796/v1)
Supplement: Supplementary file 3 [file 77c1dc6974c14dbc6dc6e5e7.xlsx]

## Sheet: 2025-12-05_GAM_model_results_al
SOM_pool	Management_predictor	adj_r2	term	friendly_term	term_type	estimate	std.error	statistic	p.value	edf	ref.df
SOC baseline 0-15 cm	Grazing (Y/N)	0.616171	(Intercept)	Intercept	parametric	20.2037	0.882994	22.8809	1.40243e-26	NA	NA
SOC baseline 0-15 cm	Grazing (Y/N)	0.616171	Grazing_Y_NNG	Effect of No Grazing (vs Grazing)	parametric	-1.56435	1.29	-1.21268	0.231519	NA	NA
SOC baseline 0-15 cm	Grazing (Y/N)	0.616171	s(clay_farm_mean_mean)	Clay (%)	smooth	NA	NA	12.6692	0	0.98707	6
SOC baseline 0-15 cm	Grazing (Y/N)	0.616171	s(Longitude_mean,Latitude_mean)	Spatial (longitude x latitude)	smooth	NA	NA	3.63027e-06	0.583803	0.00014214	24
SOC baseline 0-15 cm	Grazing (Y/N)	0.616171	s(silt_farm_mean_mean)	Silt (%)	smooth	NA	NA	8.73787e-07	0.79222	2.55914e-05	6
SOC baseline 0-15 cm	Grazing (Y/N)	0.616171	s(Ca_sat_0_15cm_mean)	Ca saturation 0-15 cm	smooth	NA	NA	0.217104	0.136088	0.565738	6
SOC baseline 0-15 cm	Conventional-Regenerative Classification	0.597856	(Intercept)	Intercept	parametric	19.3984	1.09739	17.6769	1.00469e-21	NA	NA
SOC baseline 0-15 cm	Conventional-Regenerative Classification	0.597856	Score.Result_using_winter_cover_cropsRegenerative	Effect of management classification	parametric	0.32954	1.46191	0.225417	0.822688	NA	NA
SOC baseline 0-15 cm	Conventional-Regenerative Classification	0.597856	Score.Result_using_winter_cover_cropsTransition	Effect of management classification	parametric	-0.632635	2.06379	-0.30654	0.760626	NA	NA
SOC baseline 0-15 cm	Conventional-Regenerative Classification	0.597856	s(clay_farm_mean_mean)	Clay (%)	smooth	NA	NA	11.7948	0	0.986073	6
SOC baseline 0-15 cm	Conventional-Regenerative Classification	0.597856	s(Longitude_mean,Latitude_mean)	Spatial (longitude x latitude)	smooth	NA	NA	9.16095e-07	0.496603	3.25175e-05	24
SOC baseline 0-15 cm	Conventional-Regenerative Classification	0.597856	s(silt_farm_mean_mean)	Silt (%)	smooth	NA	NA	1.56599e-07	0.880374	9.27834e-06	6
SOC baseline 0-15 cm	Conventional-Regenerative Classification	0.597856	s(Ca_sat_0_15cm_mean)	Ca saturation 0-15 cm	smooth	NA	NA	0.235685	0.127361	0.585992	6
SOC baseline 15-30 cm	Grazing (Y/N)	0.616171	(Intercept)	Intercept	parametric	20.2037	0.882994	22.8809	1.40243e-26	NA	NA
SOC baseline 15-30 cm	Grazing (Y/N)	0.616171	Grazing_Y_NNG	Effect of No Grazing (vs Grazing)	parametric	-1.56435	1.29	-1.21268	0.231519	NA	NA
SOC baseline 15-30 cm	Grazing (Y/N)	0.616171	s(clay_farm_mean_mean)	Clay (%)	smooth	NA	NA	12.6692	0	0.98707	6
SOC baseline 15-30 cm	Grazing (Y/N)	0.616171	s(Longitude_mean,Latitude_mean)	Spatial (longitude x latitude)	smooth	NA	NA	3.63027e-06	0.583803	0.00014214	24
SOC baseline 15-30 cm	Grazing (Y/N)	0.616171	s(silt_farm_mean_mean)	Silt (%)	smooth	NA	NA	8.73787e-07	0.79222	2.55914e-05	6
SOC baseline 15-30 cm	Grazing (Y/N)	0.616171	s(Ca_sat_0_15cm_mean)	Ca saturation 0-15 cm	smooth	NA	NA	0.217104	0.136088	0.565738	6
SOC baseline 15-30 cm	Conventional-Regenerative Classification	0.597856	(Intercept)	Intercept	parametric	19.3984	1.09739	17.6769	1.00469e-21	NA	NA
SOC baseline 15-30 cm	Conventional-Regenerative Classification	0.597856	Score.Result_using_winter_cover_cropsRegenerative	Effect of management classification	parametric	0.32954	1.46191	0.225417	0.822688	NA	NA
SOC baseline 15-30 cm	Conventional-Regenerative Classification	0.597856	Score.Result_using_winter_cover_cropsTransition	Effect of management classification	parametric	-0.632635	2.06379	-0.30654	0.760626	NA	NA
SOC baseline 15-30 cm	Conventional-Regenerative Classification	0.597856	s(clay_farm_mean_mean)	Clay (%)	smooth	NA	NA	11.7948	0	0.986073	6
SOC baseline 15-30 cm	Conventional-Regenerative Classification	0.597856	s(Longitude_mean,Latitude_mean)	Spatial (longitude x latitude)	smooth	NA	NA	9.16095e-07	0.496603	3.25175e-05	24
SOC baseline 15-30 cm	Conventional-Regenerative Classification	0.597856	s(silt_farm_mean_mean)	Silt (%)	smooth	NA	NA	1.56599e-07	0.880374	9.27834e-06	6
SOC baseline 15-30 cm	Conventional-Regenerative Classification	0.597856	s(Ca_sat_0_15cm_mean)	Ca saturation 0-15 cm	smooth	NA	NA	0.235685	0.127361	0.585992	6
SOC baseline 0-30 cm	Grazing (Y/N)	0.616171	(Intercept)	Intercept	parametric	40.4074	1.76599	22.8809	1.40243e-26	NA	NA
SOC baseline 0-30 cm	Grazing (Y/N)	0.616171	Grazing_Y_NNG	Effect of No Grazing (vs Grazing)	parametric	-3.12871	2.58	-1.21268	0.231519	NA	NA
SOC baseline 0-30 cm	Grazing (Y/N)	0.616171	s(clay_farm_mean_mean)	Clay (%)	smooth	NA	NA	12.6692	0	0.98707	6
SOC baseline 0-30 cm	Grazing (Y/N)	0.616171	s(Longitude_mean,Latitude_mean)	Spatial (longitude x latitude)	smooth	NA	NA	3.63027e-06	0.583803	0.00014214	24
SOC baseline 0-30 cm	Grazing (Y/N)	0.616171	s(silt_farm_mean_mean)	Silt (%)	smooth	NA	NA	8.73787e-07	0.79222	2.55914e-05	6
SOC baseline 0-30 cm	Grazing (Y/N)	0.616171	s(Ca_sat_0_15cm_mean)	Ca saturation 0-15 cm	smooth	NA	NA	0.217104	0.136088	0.565738	6
SOC baseline 0-30 cm	Conventional-Regenerative Classification	0.597857	(Intercept)	Intercept	parametric	38.7968	2.19478	17.6769	1.00507e-21	NA	NA
SOC baseline 0-30 cm	Conventional-Regenerative Classification	0.597857	Score.Result_using_winter_cover_cropsRegenerative	Effect of management classification	parametric	0.659048	2.92383	0.225406	0.822697	NA	NA
SOC baseline 0-30 cm	Conventional-Regenerative Classification	0.597857	Score.Result_using_winter_cover_cropsTransition	Effect of management classification	parametric	-1.26536	4.12762	-0.30656	0.760611	NA	NA
SOC baseline 0-30 cm	Conventional-Regenerative Classification	0.597857	s(clay_farm_mean_mean)	Clay (%)	smooth	NA	NA	11.7947	0	0.986085	6
SOC baseline 0-30 cm	Conventional-Regenerative Classification	0.597857	s(Longitude_mean,Latitude_mean)	Spatial (longitude x latitude)	smooth	NA	NA	2.70884e-06	0.487913	9.51036e-05	24
SOC baseline 0-30 cm	Conventional-Regenerative Classification	0.597857	s(silt_farm_mean_mean)	Silt (%)	smooth	NA	NA	1.15685e-06	0.88045	6.86272e-05	6
SOC baseline 0-30 cm	Conventional-Regenerative Classification	0.597857	s(Ca_sat_0_15cm_mean)	Ca saturation 0-15 cm	smooth	NA	NA	0.235771	0.12738	0.586457	6
SOC baseline 0-60 cm	Grazing (Y/N)	0.583499	(Intercept)	Intercept	parametric	62.3972	3.42565	18.2147	2.04096e-20	NA	NA
SOC baseline 0-60 cm	Grazing (Y/N)	0.583499	Grazing_Y_NNG	Effect of No Grazing (vs Grazing)	parametric	-6.46235	5.08796	-1.27013	0.211731	NA	NA
SOC baseline 0-60 cm	Grazing (Y/N)	0.583499	s(clay_farm_mean_mean)	Clay (%)	smooth	NA	NA	1.40421	0.00149758	0.893936	6
SOC baseline 0-60 cm	Grazing (Y/N)	0.583499	s(Longitude_mean,Latitude_mean)	Spatial (longitude x latitude)	smooth	NA	NA	0.78942	0.0108327	6.9264	24
SOC baseline 0-60 cm	Grazing (Y/N)	0.583499	s(silt_farm_mean_mean)	Silt (%)	smooth	NA	NA	1.27819e-06	0.902414	7.18138e-05	6
SOC baseline 0-60 cm	Grazing (Y/N)	0.583499	s(Ca_sat_0_15cm_mean)	Ca saturation 0-15 cm	smooth	NA	NA	0.410706	0.0831119	1.02579	6
SOC baseline 0-60 cm	Conventional-Regenerative Classification	0.400208	(Intercept)	Intercept	parametric	61.8247	4.92443	12.5547	4.42905e-16	NA	NA
SOC baseline 0-60 cm	Conventional-Regenerative Classification	0.400208	Score.Result_using_winter_cover_cropsRegenerative	Effect of management classification	parametric	-2.98542	6.57016	-0.45439	0.651801	NA	NA
SOC baseline 0-60 cm	Conventional-Regenerative Classification	0.400208	Score.Result_using_winter_cover_cropsTransition	Effect of management classification	parametric	-6.99016	9.40325	-0.743377	0.461238	NA	NA
SOC baseline 0-60 cm	Conventional-Regenerative Classification	0.400208	s(clay_farm_mean_mean)	Clay (%)	smooth	NA	NA	5.14086	1.01736e-06	0.968601	6
SOC baseline 0-60 cm	Conventional-Regenerative Classification	0.400208	s(Longitude_mean,Latitude_mean)	Spatial (longitude x latitude)	smooth	NA	NA	0.027107	0.287905	0.535707	24
SOC baseline 0-60 cm	Conventional-Regenerative Classification	0.400208	s(silt_farm_mean_mean)	Silt (%)	smooth	NA	NA	5.28834e-06	0.659773	9.02511e-05	6
SOC baseline 0-60 cm	Conventional-Regenerative Classification	0.400208	s(Ca_sat_0_15cm_mean)	Ca saturation 0-15 cm	smooth	NA	NA	0.279904	0.144295	0.867917	6
SOC baseline 30-60 cm	Grazing (Y/N)	0.583499	(Intercept)	Intercept	parametric	31.1986	1.71283	18.2147	2.04096e-20	NA	NA
SOC baseline 30-60 cm	Grazing (Y/N)	0.583499	Grazing_Y_NNG	Effect of No Grazing (vs Grazing)	parametric	-3.23117	2.54398	-1.27013	0.211731	NA	NA
SOC baseline 30-60 cm	Grazing (Y/N)	0.583499	s(clay_farm_mean_mean)	Clay (%)	smooth	NA	NA	1.40421	0.00149758	0.893936	6
SOC baseline 30-60 cm	Grazing (Y/N)	0.583499	s(Longitude_mean,Latitude_mean)	Spatial (longitude x latitude)	smooth	NA	NA	0.78942	0.0108327	6.9264	24
SOC baseline 30-60 cm	Grazing (Y/N)	0.583499	s(silt_farm_mean_mean)	Silt (%)	smooth	NA	NA	1.27819e-06	0.902414	7.18138e-05	6
SOC baseline 30-60 cm	Grazing (Y/N)	0.583499	s(Ca_sat_0_15cm_mean)	Ca saturation 0-15 cm	smooth	NA	NA	0.410706	0.0831119	1.02579	6
SOC baseline 30-60 cm	Conventional-Regenerative Classification	0.400209	(Intercept)	Intercept	parametric	30.9123	2.46221	12.5547	4.42858e-16	NA	NA
SOC baseline 30-60 cm	Conventional-Regenerative Classification	0.400209	Score.Result_using_winter_cover_cropsRegenerative	Effect of management classification	parametric	-1.49262	3.28507	-0.454366	0.651818	NA	NA
SOC baseline 30-60 cm	Conventional-Regenerative Classification	0.400209	Score.Result_using_winter_cover_cropsTransition	Effect of management classification	parametric	-3.495	4.70162	-0.74336	0.461248	NA	NA
SOC baseline 30-60 cm	Conventional-Regenerative Classification	0.400209	s(clay_farm_mean_mean)	Clay (%)	smooth	NA	NA	5.14089	1.01736e-06	0.968599	6
SOC baseline 30-60 cm	Conventional-Regenerative Classification	0.400209	s(Longitude_mean,Latitude_mean)	Spatial (longitude x latitude)	smooth	NA	NA	0.0271065	0.287912	0.535703	24
SOC baseline 30-60 cm	Conventional-Regenerative Classification	0.400209	s(silt_farm_mean_mean)	Silt (%)	smooth	NA	NA	1.94553e-06	0.659768	3.32022e-05	6
SOC baseline 30-60 cm	Conventional-Regenerative Classification	0.400209	s(Ca_sat_0_15cm_mean)	Ca saturation 0-15 cm	smooth	NA	NA	0.279889	0.144281	0.867821	6
SOC stock 0-15 cm	Grazing (Y/N)	0.911559	(Intercept)	Intercept	parametric	37.9158	0.617225	61.4294	1.54333e-36	NA	NA
SOC stock 0-15 cm	Grazing (Y/N)	0.911559	Grazing_Y_NNG	Effect of No Grazing (vs Grazing)	parametric	-5.42796	0.93272	-5.8195	1.45706e-06	NA	NA
SOC stock 0-15 cm	Grazing (Y/N)	0.911559	s(clay_farm_mean_mean)	Clay (%)	smooth	NA	NA	6.13409	3.88162e-07	2.17393	6
SOC stock 0-15 cm	Grazing (Y/N)	0.911559	s(Longitude_mean,Latitude_mean)	Spatial (longitude x latitude)	smooth	NA	NA	5.79995	0	8.31526	24
SOC stock 0-15 cm	Grazing (Y/N)	0.911559	s(silt_farm_mean_mean)	Silt (%)	smooth	NA	NA	0.503127	0.0346796	0.751633	6
SOC stock 0-15 cm	Grazing (Y/N)	0.911559	s(Ca_sat_0_15cm_mean)	Ca saturation 0-15 cm	smooth	NA	NA	3.17677	6.78916e-05	1.62361	6
SOC stock 0-15 cm	Conventional-Regenerative Classification	0.869299	(Intercept)	Intercept	parametric	33.3482	0.991261	33.6422	9.25397e-29	NA	NA
SOC stock 0-15 cm	Conventional-Regenerative Classification	0.869299	Score.Result_using_winter_cover_cropsRegenerative	Effect of management classification	parametric	4.50713	1.38441	3.25562	0.00247019	NA	NA
SOC stock 0-15 cm	Conventional-Regenerative Classification	0.869299	Score.Result_using_winter_cover_cropsTransition	Effect of management classification	parametric	-1.31437	1.945	-0.675768	0.503514	NA	NA
SOC stock 0-15 cm	Conventional-Regenerative Classification	0.869299	s(clay_farm_mean_mean)	Clay (%)	smooth	NA	NA	4.39448	1.35535e-06	1.4006	6
SOC stock 0-15 cm	Conventional-Regenerative Classification	0.869299	s(Longitude_mean,Latitude_mean)	Spatial (longitude x latitude)	smooth	NA	NA	2.98579	0	6.80994	24
SOC stock 0-15 cm	Conventional-Regenerative Classification	0.869299	s(silt_farm_mean_mean)	Silt (%)	smooth	NA	NA	0.363449	0.0828148	0.94299	6
SOC stock 0-15 cm	Conventional-Regenerative Classification	0.869299	s(Ca_sat_0_15cm_mean)	Ca saturation 0-15 cm	smooth	NA	NA	1.80654	0.000952476	0.915927	6
SOC stock 15-30 cm	Grazing (Y/N)	0.713344	(Intercept)	Intercept	parametric	23.698	0.816796	29.0134	2.67762e-30	NA	NA
SOC stock 15-30 cm	Grazing (Y/N)	0.713344	Grazing_Y_NNG	Effect of No Grazing (vs Grazing)	parametric	-2.10873	1.19418	-1.76585	0.084368	NA	NA
SOC stock 15-30 cm	Grazing (Y/N)	0.713344	s(clay_farm_mean_mean)	Clay (%)	smooth	NA	NA	14.9333	0	0.988966	6
SOC stock 15-30 cm	Grazing (Y/N)	0.713344	s(Longitude_mean,Latitude_mean)	Spatial (longitude x latitude)	smooth	NA	NA	0.351224	0.00827455	1.5585	24
SOC stock 15-30 cm	Grazing (Y/N)	0.713344	s(silt_farm_mean_mean)	Silt (%)	smooth	NA	NA	7.68269e-07	0.767817	2.15365e-05	6
SOC stock 15-30 cm	Grazing (Y/N)	0.713344	s(Ca_sat_0_15cm_mean)	Ca saturation 0-15 cm	smooth	NA	NA	0.171362	0.160442	0.507181	6
SOC stock 15-30 cm	Conventional-Regenerative Classification	0.69034	(Intercept)	Intercept	parametric	22.1994	1.0465	21.2129	1.94644e-24	NA	NA
SOC stock 15-30 cm	Conventional-Regenerative Classification	0.69034	Score.Result_using_winter_cover_cropsRegenerative	Effect of management classification	parametric	1.192	1.41543	0.842144	0.404356	NA	NA
SOC stock 15-30 cm	Conventional-Regenerative Classification	0.69034	Score.Result_using_winter_cover_cropsTransition	Effect of management classification	parametric	-0.524973	1.98557	-0.264393	0.792737	NA	NA
SOC stock 15-30 cm	Conventional-Regenerative Classification	0.69034	s(clay_farm_mean_mean)	Clay (%)	smooth	NA	NA	13.6295	0	0.987948	6
SOC stock 15-30 cm	Conventional-Regenerative Classification	0.69034	s(Longitude_mean,Latitude_mean)	Spatial (longitude x latitude)	smooth	NA	NA	0.228306	0.0279411	1.39056	24
SOC stock 15-30 cm	Conventional-Regenerative Classification	0.69034	s(silt_farm_mean_mean)	Silt (%)	smooth	NA	NA	3.13811e-07	0.855136	1.3677e-05	6
SOC stock 15-30 cm	Conventional-Regenerative Classification	0.69034	s(Ca_sat_0_15cm_mean)	Ca saturation 0-15 cm	smooth	NA	NA	0.176457	0.156581	0.51453	6
SOC stock 0-30 cm	Grazing (Y/N)	0.828838	(Intercept)	Intercept	parametric	61.4268	1.40024	43.8687	1.26678e-37	NA	NA
SOC stock 0-30 cm	Grazing (Y/N)	0.828838	Grazing_Y_NNG	Effect of No Grazing (vs Grazing)	parametric	-7.13817	2.04801	-3.48542	0.00113556	NA	NA
SOC stock 0-30 cm	Grazing (Y/N)	0.828838	s(clay_farm_mean_mean)	Clay (%)	smooth	NA	NA	19.8504	0	0.991682	6
SOC stock 0-30 cm	Grazing (Y/N)	0.828838	s(Longitude_mean,Latitude_mean)	Spatial (longitude x latitude)	smooth	NA	NA	1.98467	0	1.89083	24
SOC stock 0-30 cm	Grazing (Y/N)	0.828838	s(silt_farm_mean_mean)	Silt (%)	smooth	NA	NA	9.5666e-08	0.96898	1.43912e-05	6
SOC stock 0-30 cm	Grazing (Y/N)	0.828838	s(Ca_sat_0_15cm_mean)	Ca saturation 0-15 cm	smooth	NA	NA	0.321174	0.0941285	0.65871	6
SOC stock 0-30 cm	Conventional-Regenerative Classification	0.804876	(Intercept)	Intercept	parametric	56.4338	1.86744	30.2199	2.32005e-30	NA	NA
SOC stock 0-30 cm	Conventional-Regenerative Classification	0.804876	Score.Result_using_winter_cover_cropsRegenerative	Effect of management classification	parametric	4.45603	2.54593	1.75025	0.0872914	NA	NA
SOC stock 0-30 cm	Conventional-Regenerative Classification	0.804876	Score.Result_using_winter_cover_cropsTransition	Effect of management classification	parametric	-3.78091	3.52551	-1.07244	0.289573	NA	NA
SOC stock 0-30 cm	Conventional-Regenerative Classification	0.804876	s(clay_farm_mean_mean)	Clay (%)	smooth	NA	NA	17.0011	0	0.990323	6
SOC stock 0-30 cm	Conventional-Regenerative Classification	0.804876	s(Longitude_mean,Latitude_mean)	Spatial (longitude x latitude)	smooth	NA	NA	1.21292	6.70232e-06	1.82927	24
SOC stock 0-30 cm	Conventional-Regenerative Classification	0.804876	s(silt_farm_mean_mean)	Silt (%)	smooth	NA	NA	8.38505e-08	0.926883	7.26053e-06	6
SOC stock 0-30 cm	Conventional-Regenerative Classification	0.804876	s(Ca_sat_0_15cm_mean)	Ca saturation 0-15 cm	smooth	NA	NA	0.354267	0.0836998	0.680053	6
SOC stock 30-60 cm	Grazing (Y/N)	0.529139	(Intercept)	Intercept	parametric	34.6642	1.81892	19.0575	3.24778e-23	NA	NA
SOC stock 30-60 cm	Grazing (Y/N)	0.529139	Grazing_Y_NNG	Effect of No Grazing (vs Grazing)	parametric	-2.99898	2.65932	-1.12773	0.265395	NA	NA
SOC stock 30-60 cm	Grazing (Y/N)	0.529139	s(clay_farm_mean_mean)	Clay (%)	smooth	NA	NA	8.84545	0	0.981518	6
SOC stock 30-60 cm	Grazing (Y/N)	0.529139	s(Longitude_mean,Latitude_mean)	Spatial (longitude x latitude)	smooth	NA	NA	4.73816e-06	0.673818	0.000234479	24
SOC stock 30-60 cm	Grazing (Y/N)	0.529139	s(silt_farm_mean_mean)	Silt (%)	smooth	NA	NA	4.69619e-07	0.804951	1.53183e-05	6
SOC stock 30-60 cm	Grazing (Y/N)	0.529139	s(Ca_sat_0_15cm_mean)	Ca saturation 0-15 cm	smooth	NA	NA	0.289572	0.147266	0.885499	6
SOC stock 30-60 cm	Conventional-Regenerative Classification	0.508126	(Intercept)	Intercept	parametric	34.0459	2.24919	15.137	4.34444e-19	NA	NA
SOC stock 30-60 cm	Conventional-Regenerative Classification	0.508126	Score.Result_using_winter_cover_cropsRegenerative	Effect of management classification	parametric	-1.04761	2.98663	-0.350766	0.727432	NA	NA
SOC stock 30-60 cm	Conventional-Regenerative Classification	0.508126	Score.Result_using_winter_cover_cropsTransition	Effect of management classification	parametric	-1.93345	4.26981	-0.452819	0.652896	NA	NA
SOC stock 30-60 cm	Conventional-Regenerative Classification	0.508126	s(clay_farm_mean_mean)	Clay (%)	smooth	NA	NA	8.42015	0	0.980593	6
SOC stock 30-60 cm	Conventional-Regenerative Classification	0.508126	s(Longitude_mean,Latitude_mean)	Spatial (longitude x latitude)	smooth	NA	NA	5.66858e-06	0.62918	0.000248413	24
SOC stock 30-60 cm	Conventional-Regenerative Classification	0.508126	s(silt_farm_mean_mean)	Silt (%)	smooth	NA	NA	9.06142e-07	0.815999	2.99496e-05	6
SOC stock 30-60 cm	Conventional-Regenerative Classification	0.508126	s(Ca_sat_0_15cm_mean)	Ca saturation 0-15 cm	smooth	NA	NA	0.295352	0.138276	0.872018	6
SOC stock 0-60 cm	Grazing (Y/N)	0.722972	(Intercept)	Intercept	parametric	96.1813	3.02601	31.7848	1.15849e-31	NA	NA
SOC stock 0-60 cm	Grazing (Y/N)	0.722972	Grazing_Y_NNG	Effect of No Grazing (vs Grazing)	parametric	-10.3296	4.43093	-2.33124	0.0244592	NA	NA
SOC stock 0-60 cm	Grazing (Y/N)	0.722972	s(clay_farm_mean_mean)	Clay (%)	smooth	NA	NA	14.7184	0	0.988824	6
SOC stock 0-60 cm	Grazing (Y/N)	0.722972	s(Longitude_mean,Latitude_mean)	Spatial (longitude x latitude)	smooth	NA	NA	0.455258	0.0032422	1.66563	24
SOC stock 0-60 cm	Grazing (Y/N)	0.722972	s(silt_farm_mean_mean)	Silt (%)	smooth	NA	NA	5.86035e-08	0.848212	2.91954e-06	6
SOC stock 0-60 cm	Grazing (Y/N)	0.722972	s(Ca_sat_0_15cm_mean)	Ca saturation 0-15 cm	smooth	NA	NA	0.388244	0.107423	1.01439	6
SOC stock 0-60 cm	Conventional-Regenerative Classification	0.691978	(Intercept)	Intercept	parametric	90.8981	3.955	22.983	1.08785e-25	NA	NA
SOC stock 0-60 cm	Conventional-Regenerative Classification	0.691978	Score.Result_using_winter_cover_cropsRegenerative	Effect of management classification	parametric	2.85921	5.36684	0.532755	0.596962	NA	NA
SOC stock 0-60 cm	Conventional-Regenerative Classification	0.691978	Score.Result_using_winter_cover_cropsTransition	Effect of management classification	parametric	-6.76031	7.49512	-0.901961	0.372131	NA	NA
SOC stock 0-60 cm	Conventional-Regenerative Classification	0.691978	s(clay_farm_mean_mean)	Clay (%)	smooth	NA	NA	13.1104	0	0.987449	6
SOC stock 0-60 cm	Conventional-Regenerative Classification	0.691978	s(Longitude_mean,Latitude_mean)	Spatial (longitude x latitude)	smooth	NA	NA	0.288246	0.0183602	1.56897	24
SOC stock 0-60 cm	Conventional-Regenerative Classification	0.691978	s(silt_farm_mean_mean)	Silt (%)	smooth	NA	NA	3.21357e-07	0.718923	9.32852e-06	6
SOC stock 0-60 cm	Conventional-Regenerative Classification	0.691978	s(Ca_sat_0_15cm_mean)	Ca saturation 0-15 cm	smooth	NA	NA	0.367126	0.0795081	0.687779	6
SOC RZE 0-15 cm	Grazing (Y/N)	0.740613	(Intercept)	Intercept	parametric	17.6913	0.697824	25.3521	1.41721e-25	NA	NA
SOC RZE 0-15 cm	Grazing (Y/N)	0.740613	Grazing_Y_NNG	Effect of No Grazing (vs Grazing)	parametric	-3.81939	1.03738	-3.68176	0.000710418	NA	NA
SOC RZE 0-15 cm	Grazing (Y/N)	0.740613	s(clay_farm_mean_mean)	Clay (%)	smooth	NA	NA	1.14814e-05	0.648755	0.000199915	6
SOC RZE 0-15 cm	Grazing (Y/N)	0.740613	s(Longitude_mean,Latitude_mean)	Spatial (longitude x latitude)	smooth	NA	NA	3.71668	0	5.36664	24
SOC RZE 0-15 cm	Grazing (Y/N)	0.740613	s(silt_farm_mean_mean)	Silt (%)	smooth	NA	NA	1.14698	0.00892238	1.5083	6
SOC RZE 0-15 cm	Grazing (Y/N)	0.740613	s(Ca_sat_0_15cm_mean)	Ca saturation 0-15 cm	smooth	NA	NA	1.07112	0.0202993	1.75166	6
SOC RZE 0-15 cm	Conventional-Regenerative Classification	0.714583	(Intercept)	Intercept	parametric	13.9935	0.936607	14.9406	8.06679e-18	NA	NA
SOC RZE 0-15 cm	Conventional-Regenerative Classification	0.714583	Score.Result_using_winter_cover_cropsRegenerative	Effect of management classification	parametric	4.20231	1.28922	3.25959	0.00230337	NA	NA
SOC RZE 0-15 cm	Conventional-Regenerative Classification	0.714583	Score.Result_using_winter_cover_cropsTransition	Effect of management classification	parametric	-1.07229	1.8084	-0.59295	0.556603	NA	NA
SOC RZE 0-15 cm	Conventional-Regenerative Classification	0.714583	s(clay_farm_mean_mean)	Clay (%)	smooth	NA	NA	7.93621e-07	0.886484	4.89755e-05	6
SOC RZE 0-15 cm	Conventional-Regenerative Classification	0.714583	s(Longitude_mean,Latitude_mean)	Spatial (longitude x latitude)	smooth	NA	NA	2.31902	0	4.39422	24
SOC RZE 0-15 cm	Conventional-Regenerative Classification	0.714583	s(silt_farm_mean_mean)	Silt (%)	smooth	NA	NA	1.08722	0.0104751	1.47022	6
SOC RZE 0-15 cm	Conventional-Regenerative Classification	0.714583	s(Ca_sat_0_15cm_mean)	Ca saturation 0-15 cm	smooth	NA	NA	0.476361	0.0477781	0.741235	6
SOC RZE 15-30 cm	Grazing (Y/N)	0.670983	(Intercept)	Intercept	parametric	3.56626	0.175441	20.3273	7.77416e-23	NA	NA
SOC RZE 15-30 cm	Grazing (Y/N)	0.670983	Grazing_Y_NNG	Effect of No Grazing (vs Grazing)	parametric	-0.697632	0.259375	-2.68966	0.0103451	NA	NA
SOC RZE 15-30 cm	Grazing (Y/N)	0.670983	s(clay_farm_mean_mean)	Clay (%)	smooth	NA	NA	0.839624	0.0173402	1.40831	6
SOC RZE 15-30 cm	Grazing (Y/N)	0.670983	s(Longitude_mean,Latitude_mean)	Spatial (longitude x latitude)	smooth	NA	NA	2.78386	0	5.1652	24
SOC RZE 15-30 cm	Grazing (Y/N)	0.670983	s(silt_farm_mean_mean)	Silt (%)	smooth	NA	NA	2.62529e-06	0.683297	5.12855e-05	6
SOC RZE 15-30 cm	Grazing (Y/N)	0.670983	s(Ca_sat_0_15cm_mean)	Ca saturation 0-15 cm	smooth	NA	NA	1.49897e-06	0.68044	2.78388e-05	6
SOC RZE 15-30 cm	Conventional-Regenerative Classification	0.720239	(Intercept)	Intercept	parametric	2.56725	0.208422	12.3175	2.67742e-15	NA	NA
SOC RZE 15-30 cm	Conventional-Regenerative Classification	0.720239	Score.Result_using_winter_cover_cropsRegenerative	Effect of management classification	parametric	1.29475	0.28663	4.51715	5.30004e-05	NA	NA
SOC RZE 15-30 cm	Conventional-Regenerative Classification	0.720239	Score.Result_using_winter_cover_cropsTransition	Effect of management classification	parametric	0.261659	0.400839	0.652777	0.517578	NA	NA
SOC RZE 15-30 cm	Conventional-Regenerative Classification	0.720239	s(clay_farm_mean_mean)	Clay (%)	smooth	NA	NA	0.670961	0.0293161	1.27961	6
SOC RZE 15-30 cm	Conventional-Regenerative Classification	0.720239	s(Longitude_mean,Latitude_mean)	Spatial (longitude x latitude)	smooth	NA	NA	2.18069	5.9161e-07	4.10049	24
SOC RZE 15-30 cm	Conventional-Regenerative Classification	0.720239	s(silt_farm_mean_mean)	Silt (%)	smooth	NA	NA	9.62007e-07	0.84695	3.74464e-05	6
SOC RZE 15-30 cm	Conventional-Regenerative Classification	0.720239	s(Ca_sat_0_15cm_mean)	Ca saturation 0-15 cm	smooth	NA	NA	8.91033e-07	0.779695	3.15313e-05	6
SOC RZE 0-30 cm	Grazing (Y/N)	0.775143	(Intercept)	Intercept	parametric	21.2671	0.766216	27.756	7.05995e-27	NA	NA
SOC RZE 0-30 cm	Grazing (Y/N)	0.775143	Grazing_Y_NNG	Effect of No Grazing (vs Grazing)	parametric	-4.5373	1.14057	-3.97811	0.000300497	NA	NA
SOC RZE 0-30 cm	Grazing (Y/N)	0.775143	s(clay_farm_mean_mean)	Clay (%)	smooth	NA	NA	0.000186556	0.30498	0.00116521	6
SOC RZE 0-30 cm	Grazing (Y/N)	0.775143	s(Longitude_mean,Latitude_mean)	Spatial (longitude x latitude)	smooth	NA	NA	4.51612	0	5.54932	24
SOC RZE 0-30 cm	Grazing (Y/N)	0.775143	s(silt_farm_mean_mean)	Silt (%)	smooth	NA	NA	1.08112	0.0107033	1.48663	6
SOC RZE 0-30 cm	Grazing (Y/N)	0.775143	s(Ca_sat_0_15cm_mean)	Ca saturation 0-15 cm	smooth	NA	NA	1.13812	0.0192953	1.87341	6
SOC RZE 0-30 cm	Conventional-Regenerative Classification	0.763596	(Intercept)	Intercept	parametric	16.5633	1.00858	16.4224	3.90044e-19	NA	NA
SOC RZE 0-30 cm	Conventional-Regenerative Classification	0.763596	Score.Result_using_winter_cover_cropsRegenerative	Effect of management classification	parametric	5.46923	1.38906	3.93736	0.000329389	NA	NA
SOC RZE 0-30 cm	Conventional-Regenerative Classification	0.763596	Score.Result_using_winter_cover_cropsTransition	Effect of management classification	parametric	-0.733291	1.95627	-0.374842	0.709804	NA	NA
SOC RZE 0-30 cm	Conventional-Regenerative Classification	0.763596	s(clay_farm_mean_mean)	Clay (%)	smooth	NA	NA	1.76195e-05	0.54863	0.000222295	6
SOC RZE 0-30 cm	Conventional-Regenerative Classification	0.763596	s(Longitude_mean,Latitude_mean)	Spatial (longitude x latitude)	smooth	NA	NA	2.98613	0	4.61352	24
SOC RZE 0-30 cm	Conventional-Regenerative Classification	0.763596	s(silt_farm_mean_mean)	Silt (%)	smooth	NA	NA	1.03534	0.0119929	1.45269	6
SOC RZE 0-30 cm	Conventional-Regenerative Classification	0.763596	s(Ca_sat_0_15cm_mean)	Ca saturation 0-15 cm	smooth	NA	NA	0.467855	0.0557829	0.857014	6
SOC RZE 30-60 cm	Grazing (Y/N)	0.247377	(Intercept)	Intercept	parametric	3.371	0.548652	6.14415	2.18799e-07	NA	NA
SOC RZE 30-60 cm	Grazing (Y/N)	0.247377	Grazing_Y_NNG	Effect of No Grazing (vs Grazing)	parametric	0.433813	0.804693	0.539104	0.592573	NA	NA
SOC RZE 30-60 cm	Grazing (Y/N)	0.247377	s(clay_farm_mean_mean)	Clay (%)	smooth	NA	NA	0.746991	0.0226966	1.29144	6
SOC RZE 30-60 cm	Grazing (Y/N)	0.247377	s(Longitude_mean,Latitude_mean)	Spatial (longitude x latitude)	smooth	NA	NA	0.284386	0.0173651	2.13168	24
SOC RZE 30-60 cm	Grazing (Y/N)	0.247377	s(silt_farm_mean_mean)	Silt (%)	smooth	NA	NA	0.047424	0.24314	0.221692	6
SOC RZE 30-60 cm	Grazing (Y/N)	0.247377	s(Ca_sat_0_15cm_mean)	Ca saturation 0-15 cm	smooth	NA	NA	2.57826e-06	0.666158	5.15657e-05	6
SOC RZE 30-60 cm	Conventional-Regenerative Classification	0.284974	(Intercept)	Intercept	parametric	3.09495	0.67905	4.55776	4.44594e-05	NA	NA
SOC RZE 30-60 cm	Conventional-Regenerative Classification	0.284974	Score.Result_using_winter_cover_cropsRegenerative	Effect of management classification	parametric	0.394166	0.926158	0.425592	0.672588	NA	NA
SOC RZE 30-60 cm	Conventional-Regenerative Classification	0.284974	Score.Result_using_winter_cover_cropsTransition	Effect of management classification	parametric	2.00633	1.29758	1.54621	0.12959	NA	NA
SOC RZE 30-60 cm	Conventional-Regenerative Classification	0.284974	s(clay_farm_mean_mean)	Clay (%)	smooth	NA	NA	0.853123	0.0161134	1.33464	6
SOC RZE 30-60 cm	Conventional-Regenerative Classification	0.284974	s(Longitude_mean,Latitude_mean)	Spatial (longitude x latitude)	smooth	NA	NA	0.395479	0.00556	2.36295	24
SOC RZE 30-60 cm	Conventional-Regenerative Classification	0.284974	s(silt_farm_mean_mean)	Silt (%)	smooth	NA	NA	0.161307	0.151931	0.492221	6
SOC RZE 30-60 cm	Conventional-Regenerative Classification	0.284974	s(Ca_sat_0_15cm_mean)	Ca saturation 0-15 cm	smooth	NA	NA	2.5887e-06	0.602834	4.32862e-05	6
SOC RZE 0-60 cm	Grazing (Y/N)	0.832685	(Intercept)	Intercept	parametric	24.6846	0.747338	33.0301	3.41701e-29	NA	NA
SOC RZE 0-60 cm	Grazing (Y/N)	0.832685	Grazing_Y_NNG	Effect of No Grazing (vs Grazing)	parametric	-4.20263	1.11419	-3.77191	0.000563307	NA	NA
SOC RZE 0-60 cm	Grazing (Y/N)	0.832685	s(clay_farm_mean_mean)	Clay (%)	smooth	NA	NA	1.60051	0.00282172	1.85436	6
SOC RZE 0-60 cm	Grazing (Y/N)	0.832685	s(Longitude_mean,Latitude_mean)	Spatial (longitude x latitude)	smooth	NA	NA	6.56134	0	6.4683	24
SOC RZE 0-60 cm	Grazing (Y/N)	0.832685	s(silt_farm_mean_mean)	Silt (%)	smooth	NA	NA	0.452543	0.0440019	0.731001	6
SOC RZE 0-60 cm	Grazing (Y/N)	0.832685	s(Ca_sat_0_15cm_mean)	Ca saturation 0-15 cm	smooth	NA	NA	0.388816	0.0652953	0.700083	6
SOC RZE 0-60 cm	Conventional-Regenerative Classification	0.82667	(Intercept)	Intercept	parametric	19.6035	0.996155	19.6792	1.67802e-21	NA	NA
SOC RZE 0-60 cm	Conventional-Regenerative Classification	0.82667	Score.Result_using_winter_cover_cropsRegenerative	Effect of management classification	parametric	5.83638	1.37832	4.23441	0.000140408	NA	NA
SOC RZE 0-60 cm	Conventional-Regenerative Classification	0.82667	Score.Result_using_winter_cover_cropsTransition	Effect of management classification	parametric	1.74856	1.93925	0.901671	0.372923	NA	NA
SOC RZE 0-60 cm	Conventional-Regenerative Classification	0.82667	s(clay_farm_mean_mean)	Clay (%)	smooth	NA	NA	1.07145	0.010889	1.61802	6
SOC RZE 0-60 cm	Conventional-Regenerative Classification	0.82667	s(Longitude_mean,Latitude_mean)	Spatial (longitude x latitude)	smooth	NA	NA	4.76189	0	5.16032	24
SOC RZE 0-60 cm	Conventional-Regenerative Classification	0.82667	s(silt_farm_mean_mean)	Silt (%)	smooth	NA	NA	0.267185	0.0919186	0.616205	6
SOC RZE 0-60 cm	Conventional-Regenerative Classification	0.82667	s(Ca_sat_0_15cm_mean)	Ca saturation 0-15 cm	smooth	NA	NA	0.355889	0.0734815	0.681065	6
TSN baseline 0-15 cm	Grazing (Y/N)	0.66814	(Intercept)	Intercept	parametric	2.05369	0.0737918	27.8309	8.32511e-27	NA	NA
TSN baseline 0-15 cm	Grazing (Y/N)	0.66814	Grazing_Y_NNG	Effect of No Grazing (vs Grazing)	parametric	-0.174229	0.109644	-1.58904	0.120372	NA	NA
TSN baseline 0-15 cm	Grazing (Y/N)	0.66814	s(clay_farm_mean_mean)	Clay (%)	smooth	NA	NA	1.2536	0.0023853	0.882661	6
TSN baseline 0-15 cm	Grazing (Y/N)	0.66814	s(Longitude_mean,Latitude_mean)	Spatial (longitude x latitude)	smooth	NA	NA	2.17954	4.70535e-06	7.51245	24
TSN baseline 0-15 cm	Grazing (Y/N)	0.66814	s(silt_farm_mean_mean)	Silt (%)	smooth	NA	NA	0.531877	0.0324036	0.761507	6
TSN baseline 0-15 cm	Grazing (Y/N)	0.66814	s(Ca_sat_0_15cm_mean)	Ca saturation 0-15 cm	smooth	NA	NA	8.90851e-06	0.378919	6.46165e-05	6
TSN baseline 0-15 cm	Conventional-Regenerative Classification	0.651659	(Intercept)	Intercept	parametric	1.90605	0.100879	18.8945	1.44906e-20	NA	NA
TSN baseline 0-15 cm	Conventional-Regenerative Classification	0.651659	Score.Result_using_winter_cover_cropsRegenerative	Effect of management classification	parametric	0.139336	0.140382	0.992551	0.327393	NA	NA
TSN baseline 0-15 cm	Conventional-Regenerative Classification	0.651659	Score.Result_using_winter_cover_cropsTransition	Effect of management classification	parametric	-0.016746	0.199595	-0.0839001	0.933589	NA	NA
TSN baseline 0-15 cm	Conventional-Regenerative Classification	0.651659	s(clay_farm_mean_mean)	Clay (%)	smooth	NA	NA	1.05943	0.00419436	0.864084	6
TSN baseline 0-15 cm	Conventional-Regenerative Classification	0.651659	s(Longitude_mean,Latitude_mean)	Spatial (longitude x latitude)	smooth	NA	NA	1.89552	1.82667e-05	7.37582	24
TSN baseline 0-15 cm	Conventional-Regenerative Classification	0.651659	s(silt_farm_mean_mean)	Silt (%)	smooth	NA	NA	0.53321	0.0340128	0.855828	6
TSN baseline 0-15 cm	Conventional-Regenerative Classification	0.651659	s(Ca_sat_0_15cm_mean)	Ca saturation 0-15 cm	smooth	NA	NA	2.45339e-06	0.417409	2.216e-05	6
TSN baseline 15-30 cm	Grazing (Y/N)	0.66814	(Intercept)	Intercept	parametric	2.05369	0.0737918	27.8309	8.32511e-27	NA	NA
TSN baseline 15-30 cm	Grazing (Y/N)	0.66814	Grazing_Y_NNG	Effect of No Grazing (vs Grazing)	parametric	-0.174229	0.109644	-1.58904	0.120372	NA	NA
TSN baseline 15-30 cm	Grazing (Y/N)	0.66814	s(clay_farm_mean_mean)	Clay (%)	smooth	NA	NA	1.2536	0.0023853	0.882661	6
TSN baseline 15-30 cm	Grazing (Y/N)	0.66814	s(Longitude_mean,Latitude_mean)	Spatial (longitude x latitude)	smooth	NA	NA	2.17954	4.70535e-06	7.51245	24
TSN baseline 15-30 cm	Grazing (Y/N)	0.66814	s(silt_farm_mean_mean)	Silt (%)	smooth	NA	NA	0.531877	0.0324036	0.761507	6
TSN baseline 15-30 cm	Grazing (Y/N)	0.66814	s(Ca_sat_0_15cm_mean)	Ca saturation 0-15 cm	smooth	NA	NA	8.90851e-06	0.378919	6.46165e-05	6
TSN baseline 15-30 cm	Conventional-Regenerative Classification	0.651659	(Intercept)	Intercept	parametric	1.90605	0.100879	18.8945	1.44906e-20	NA	NA
TSN baseline 15-30 cm	Conventional-Regenerative Classification	0.651659	Score.Result_using_winter_cover_cropsRegenerative	Effect of management classification	parametric	0.139336	0.140382	0.992551	0.327393	NA	NA
TSN baseline 15-30 cm	Conventional-Regenerative Classification	0.651659	Score.Result_using_winter_cover_cropsTransition	Effect of management classification	parametric	-0.016746	0.199595	-0.0839001	0.933589	NA	NA
TSN baseline 15-30 cm	Conventional-Regenerative Classification	0.651659	s(clay_farm_mean_mean)	Clay (%)	smooth	NA	NA	1.05943	0.00419436	0.864084	6
TSN baseline 15-30 cm	Conventional-Regenerative Classification	0.651659	s(Longitude_mean,Latitude_mean)	Spatial (longitude x latitude)	smooth	NA	NA	1.89552	1.82667e-05	7.37582	24
TSN baseline 15-30 cm	Conventional-Regenerative Classification	0.651659	s(silt_farm_mean_mean)	Silt (%)	smooth	NA	NA	0.53321	0.0340128	0.855828	6
TSN baseline 15-30 cm	Conventional-Regenerative Classification	0.651659	s(Ca_sat_0_15cm_mean)	Ca saturation 0-15 cm	smooth	NA	NA	2.45339e-06	0.417409	2.216e-05	6
TSN baseline 0-30 cm	Grazing (Y/N)	0.668141	(Intercept)	Intercept	parametric	4.10738	0.147583	27.8309	8.3267e-27	NA	NA
TSN baseline 0-30 cm	Grazing (Y/N)	0.668141	Grazing_Y_NNG	Effect of No Grazing (vs Grazing)	parametric	-0.34846	0.219289	-1.58905	0.120371	NA	NA
TSN baseline 0-30 cm	Grazing (Y/N)	0.668141	s(clay_farm_mean_mean)	Clay (%)	smooth	NA	NA	1.25359	0.00238542	0.882675	6
TSN baseline 0-30 cm	Grazing (Y/N)	0.668141	s(Longitude_mean,Latitude_mean)	Spatial (longitude x latitude)	smooth	NA	NA	2.17949	4.70594e-06	7.51244	24
TSN baseline 0-30 cm	Grazing (Y/N)	0.668141	s(silt_farm_mean_mean)	Silt (%)	smooth	NA	NA	0.531915	0.0324042	0.761687	6
TSN baseline 0-30 cm	Grazing (Y/N)	0.668141	s(Ca_sat_0_15cm_mean)	Ca saturation 0-15 cm	smooth	NA	NA	9.93651e-06	0.403811	7.98709e-05	6
TSN baseline 0-30 cm	Conventional-Regenerative Classification	0.651659	(Intercept)	Intercept	parametric	3.81211	0.201758	18.8945	1.44913e-20	NA	NA
TSN baseline 0-30 cm	Conventional-Regenerative Classification	0.651659	Score.Result_using_winter_cover_cropsRegenerative	Effect of management classification	parametric	0.278671	0.280764	0.992544	0.327396	NA	NA
TSN baseline 0-30 cm	Conventional-Regenerative Classification	0.651659	Score.Result_using_winter_cover_cropsTransition	Effect of management classification	parametric	-0.0334947	0.399189	-0.0839069	0.933584	NA	NA
TSN baseline 0-30 cm	Conventional-Regenerative Classification	0.651659	s(clay_farm_mean_mean)	Clay (%)	smooth	NA	NA	1.05943	0.0041944	0.864113	6
TSN baseline 0-30 cm	Conventional-Regenerative Classification	0.651659	s(Longitude_mean,Latitude_mean)	Spatial (longitude x latitude)	smooth	NA	NA	1.89551	1.82669e-05	7.37582	24
TSN baseline 0-30 cm	Conventional-Regenerative Classification	0.651659	s(silt_farm_mean_mean)	Silt (%)	smooth	NA	NA	0.533207	0.0340131	0.855827	6
TSN baseline 0-30 cm	Conventional-Regenerative Classification	0.651659	s(Ca_sat_0_15cm_mean)	Ca saturation 0-15 cm	smooth	NA	NA	6.60415e-06	0.41809	5.98464e-05	6
TSN baseline 0-60 cm	Grazing (Y/N)	0.571416	(Intercept)	Intercept	parametric	6.75472	0.33745	20.017	1.13738e-21	NA	NA
TSN baseline 0-60 cm	Grazing (Y/N)	0.571416	Grazing_Y_NNG	Effect of No Grazing (vs Grazing)	parametric	-0.62727	0.502624	-1.24799	0.219737	NA	NA
TSN baseline 0-60 cm	Grazing (Y/N)	0.571416	s(clay_farm_mean_mean)	Clay (%)	smooth	NA	NA	0.141158	0.139033	0.458595	6
TSN baseline 0-60 cm	Grazing (Y/N)	0.571416	s(Longitude_mean,Latitude_mean)	Spatial (longitude x latitude)	smooth	NA	NA	1.91959	1.54223e-05	7.96496	24
TSN baseline 0-60 cm	Grazing (Y/N)	0.571416	s(silt_farm_mean_mean)	Silt (%)	smooth	NA	NA	0.151745	0.138517	0.47662	6
TSN baseline 0-60 cm	Grazing (Y/N)	0.571416	s(Ca_sat_0_15cm_mean)	Ca saturation 0-15 cm	smooth	NA	NA	0.101438	0.214379	0.433211	6
TSN baseline 0-60 cm	Conventional-Regenerative Classification	0.563601	(Intercept)	Intercept	parametric	6.36724	0.453186	14.0499	2.30599e-16	NA	NA
TSN baseline 0-60 cm	Conventional-Regenerative Classification	0.563601	Score.Result_using_winter_cover_cropsRegenerative	Effect of management classification	parametric	0.407841	0.628496	0.648915	0.520423	NA	NA
TSN baseline 0-60 cm	Conventional-Regenerative Classification	0.563601	Score.Result_using_winter_cover_cropsTransition	Effect of management classification	parametric	-0.747041	0.907423	-0.823256	0.415666	NA	NA
TSN baseline 0-60 cm	Conventional-Regenerative Classification	0.563601	s(clay_farm_mean_mean)	Clay (%)	smooth	NA	NA	0.118155	0.151431	0.414861	6
TSN baseline 0-60 cm	Conventional-Regenerative Classification	0.563601	s(Longitude_mean,Latitude_mean)	Spatial (longitude x latitude)	smooth	NA	NA	1.90122	1.55115e-05	7.80444	24
TSN baseline 0-60 cm	Conventional-Regenerative Classification	0.563601	s(silt_farm_mean_mean)	Silt (%)	smooth	NA	NA	0.0959746	0.175642	0.365534	6
TSN baseline 0-60 cm	Conventional-Regenerative Classification	0.563601	s(Ca_sat_0_15cm_mean)	Ca saturation 0-15 cm	smooth	NA	NA	0.172249	0.164779	0.617684	6
TSN baseline 30-60 cm	Grazing (Y/N)	0.571416	(Intercept)	Intercept	parametric	3.37736	0.168725	20.017	1.13738e-21	NA	NA
TSN baseline 30-60 cm	Grazing (Y/N)	0.571416	Grazing_Y_NNG	Effect of No Grazing (vs Grazing)	parametric	-0.313635	0.251312	-1.24799	0.219737	NA	NA
TSN baseline 30-60 cm	Grazing (Y/N)	0.571416	s(clay_farm_mean_mean)	Clay (%)	smooth	NA	NA	0.141158	0.139033	0.458595	6
TSN baseline 30-60 cm	Grazing (Y/N)	0.571416	s(Longitude_mean,Latitude_mean)	Spatial (longitude x latitude)	smooth	NA	NA	1.91959	1.54223e-05	7.96496	24
TSN baseline 30-60 cm	Grazing (Y/N)	0.571416	s(silt_farm_mean_mean)	Silt (%)	smooth	NA	NA	0.151745	0.138517	0.47662	6
TSN baseline 30-60 cm	Grazing (Y/N)	0.571416	s(Ca_sat_0_15cm_mean)	Ca saturation 0-15 cm	smooth	NA	NA	0.101437	0.214379	0.433209	6
TSN baseline 30-60 cm	Conventional-Regenerative Classification	0.5636	(Intercept)	Intercept	parametric	3.18362	0.226593	14.05	2.30575e-16	NA	NA
TSN baseline 30-60 cm	Conventional-Regenerative Classification	0.5636	Score.Result_using_winter_cover_cropsRegenerative	Effect of management classification	parametric	0.203918	0.314248	0.648908	0.520427	NA	NA
TSN baseline 30-60 cm	Conventional-Regenerative Classification	0.5636	Score.Result_using_winter_cover_cropsTransition	Effect of management classification	parametric	-0.373524	0.453711	-0.823264	0.415662	NA	NA
TSN baseline 30-60 cm	Conventional-Regenerative Classification	0.5636	s(clay_farm_mean_mean)	Clay (%)	smooth	NA	NA	0.118151	0.151429	0.414839	6
TSN baseline 30-60 cm	Conventional-Regenerative Classification	0.5636	s(Longitude_mean,Latitude_mean)	Spatial (longitude x latitude)	smooth	NA	NA	1.90123	1.55116e-05	7.80446	24
TSN baseline 30-60 cm	Conventional-Regenerative Classification	0.5636	s(silt_farm_mean_mean)	Silt (%)	smooth	NA	NA	0.0959559	0.175629	0.365417	6
TSN baseline 30-60 cm	Conventional-Regenerative Classification	0.5636	s(Ca_sat_0_15cm_mean)	Ca saturation 0-15 cm	smooth	NA	NA	0.172254	0.164771	0.617681	6
TSN stock 0-15 cm	Grazing (Y/N)	0.882821	(Intercept)	Intercept	parametric	3.42232	0.0526692	64.9776	2.30261e-37	NA	NA
TSN stock 0-15 cm	Grazing (Y/N)	0.882821	Grazing_Y_NNG	Effect of No Grazing (vs Grazing)	parametric	-0.504681	0.0800175	-6.30714	3.38946e-07	NA	NA
TSN stock 0-15 cm	Grazing (Y/N)	0.882821	s(clay_farm_mean_mean)	Clay (%)	smooth	NA	NA	0.732171	0.0181043	0.814584	6
TSN stock 0-15 cm	Grazing (Y/N)	0.882821	s(Longitude_mean,Latitude_mean)	Spatial (longitude x latitude)	smooth	NA	NA	7.43879	0	11.2094	24
TSN stock 0-15 cm	Grazing (Y/N)	0.882821	s(silt_farm_mean_mean)	Silt (%)	smooth	NA	NA	4.74564e-07	0.698528	9.49758e-06	6
TSN stock 0-15 cm	Grazing (Y/N)	0.882821	s(Ca_sat_0_15cm_mean)	Ca saturation 0-15 cm	smooth	NA	NA	0.8727	0.0122876	0.839655	6
TSN stock 0-15 cm	Conventional-Regenerative Classification	0.848212	(Intercept)	Intercept	parametric	2.9288	0.0803817	36.4362	6.99031e-29	NA	NA
TSN stock 0-15 cm	Conventional-Regenerative Classification	0.848212	Score.Result_using_winter_cover_cropsRegenerative	Effect of management classification	parametric	0.516184	0.112395	4.59258	5.73348e-05	NA	NA
TSN stock 0-15 cm	Conventional-Regenerative Classification	0.848212	Score.Result_using_winter_cover_cropsTransition	Effect of management classification	parametric	0.0266203	0.163371	0.162944	0.871525	NA	NA
TSN stock 0-15 cm	Conventional-Regenerative Classification	0.848212	s(clay_farm_mean_mean)	Clay (%)	smooth	NA	NA	0.319284	0.0736511	0.657032	6
TSN stock 0-15 cm	Conventional-Regenerative Classification	0.848212	s(Longitude_mean,Latitude_mean)	Spatial (longitude x latitude)	smooth	NA	NA	4.59408	0	10.45	24
TSN stock 0-15 cm	Conventional-Regenerative Classification	0.848212	s(silt_farm_mean_mean)	Silt (%)	smooth	NA	NA	5.87067e-07	0.48116	6.80404e-06	6
TSN stock 0-15 cm	Conventional-Regenerative Classification	0.848212	s(Ca_sat_0_15cm_mean)	Ca saturation 0-15 cm	smooth	NA	NA	0.705505	0.0211215	0.808944	6
TSN stock 15-30 cm	Grazing (Y/N)	0.713329	(Intercept)	Intercept	parametric	2.33662	0.0701684	33.3001	1.84349e-29	NA	NA
TSN stock 15-30 cm	Grazing (Y/N)	0.713329	Grazing_Y_NNG	Effect of No Grazing (vs Grazing)	parametric	-0.246317	0.104429	-2.35869	0.023656	NA	NA
TSN stock 15-30 cm	Grazing (Y/N)	0.713329	s(clay_farm_mean_mean)	Clay (%)	smooth	NA	NA	1.53575	0.00103654	0.90213	6
TSN stock 15-30 cm	Grazing (Y/N)	0.713329	s(Longitude_mean,Latitude_mean)	Spatial (longitude x latitude)	smooth	NA	NA	2.52042	1.33817e-06	7.83553	24
TSN stock 15-30 cm	Grazing (Y/N)	0.713329	s(silt_farm_mean_mean)	Silt (%)	smooth	NA	NA	0.514099	0.0339739	0.755227	6
TSN stock 15-30 cm	Grazing (Y/N)	0.713329	s(Ca_sat_0_15cm_mean)	Ca saturation 0-15 cm	smooth	NA	NA	1.56834e-05	0.334517	9.90625e-05	6
TSN stock 15-30 cm	Conventional-Regenerative Classification	0.693195	(Intercept)	Intercept	parametric	2.10723	0.0970153	21.7206	1.71092e-22	NA	NA
TSN stock 15-30 cm	Conventional-Regenerative Classification	0.693195	Score.Result_using_winter_cover_cropsRegenerative	Effect of management classification	parametric	0.227499	0.134924	1.68613	0.100286	NA	NA
TSN stock 15-30 cm	Conventional-Regenerative Classification	0.693195	Score.Result_using_winter_cover_cropsTransition	Effect of management classification	parametric	0.0163951	0.19296	0.084966	0.932752	NA	NA
TSN stock 15-30 cm	Conventional-Regenerative Classification	0.693195	s(clay_farm_mean_mean)	Clay (%)	smooth	NA	NA	1.23816	0.00244883	0.881367	6
TSN stock 15-30 cm	Conventional-Regenerative Classification	0.693195	s(Longitude_mean,Latitude_mean)	Spatial (longitude x latitude)	smooth	NA	NA	2.01261	1.18347e-05	7.64839	24
TSN stock 15-30 cm	Conventional-Regenerative Classification	0.693195	s(silt_farm_mean_mean)	Silt (%)	smooth	NA	NA	0.504169	0.034459	0.752185	6
TSN stock 15-30 cm	Conventional-Regenerative Classification	0.693195	s(Ca_sat_0_15cm_mean)	Ca saturation 0-15 cm	smooth	NA	NA	0.0280346	0.285307	0.150707	6
TSN stock 0-30 cm	Grazing (Y/N)	0.82842	(Intercept)	Intercept	parametric	5.7623	0.113186	50.9101	1.95797e-34	NA	NA
TSN stock 0-30 cm	Grazing (Y/N)	0.82842	Grazing_Y_NNG	Effect of No Grazing (vs Grazing)	parametric	-0.75816	0.170667	-4.44234	8.52235e-05	NA	NA
TSN stock 0-30 cm	Grazing (Y/N)	0.82842	s(clay_farm_mean_mean)	Clay (%)	smooth	NA	NA	1.14061	0.00429968	0.872524	6
TSN stock 0-30 cm	Grazing (Y/N)	0.82842	s(Longitude_mean,Latitude_mean)	Spatial (longitude x latitude)	smooth	NA	NA	4.27009	0	9.72813	24
TSN stock 0-30 cm	Grazing (Y/N)	0.82842	s(silt_farm_mean_mean)	Silt (%)	smooth	NA	NA	0.171116	0.124236	0.506596	6
TSN stock 0-30 cm	Grazing (Y/N)	0.82842	s(Ca_sat_0_15cm_mean)	Ca saturation 0-15 cm	smooth	NA	NA	0.325753	0.0896942	0.866907	6
TSN stock 0-30 cm	Conventional-Regenerative Classification	0.80109	(Intercept)	Intercept	parametric	5.03227	0.164852	30.526	1.62834e-26	NA	NA
TSN stock 0-30 cm	Conventional-Regenerative Classification	0.80109	Score.Result_using_winter_cover_cropsRegenerative	Effect of management classification	parametric	0.754066	0.229776	3.28175	0.00236992	NA	NA
TSN stock 0-30 cm	Conventional-Regenerative Classification	0.80109	Score.Result_using_winter_cover_cropsTransition	Effect of management classification	parametric	0.0337539	0.335292	0.10067	0.920396	NA	NA
TSN stock 0-30 cm	Conventional-Regenerative Classification	0.80109	s(clay_farm_mean_mean)	Clay (%)	smooth	NA	NA	0.7359	0.0152371	0.815376	6
TSN stock 0-30 cm	Conventional-Regenerative Classification	0.80109	s(Longitude_mean,Latitude_mean)	Spatial (longitude x latitude)	smooth	NA	NA	3.10563	7.59051e-07	9.34481	24
TSN stock 0-30 cm	Conventional-Regenerative Classification	0.80109	s(silt_farm_mean_mean)	Silt (%)	smooth	NA	NA	0.205115	0.106363	0.551723	6
TSN stock 0-30 cm	Conventional-Regenerative Classification	0.80109	s(Ca_sat_0_15cm_mean)	Ca saturation 0-15 cm	smooth	NA	NA	0.331706	0.0877249	0.865855	6
TSN stock 30-60 cm	Grazing (Y/N)	0.624474	(Intercept)	Intercept	parametric	3.64482	0.154727	23.5565	4.14279e-24	NA	NA
TSN stock 30-60 cm	Grazing (Y/N)	0.624474	Grazing_Y_NNG	Effect of No Grazing (vs Grazing)	parametric	-0.296021	0.230217	-1.28584	0.206366	NA	NA
TSN stock 30-60 cm	Grazing (Y/N)	0.624474	s(clay_farm_mean_mean)	Clay (%)	smooth	NA	NA	0.576261	0.0240098	0.775682	6
TSN stock 30-60 cm	Grazing (Y/N)	0.624474	s(Longitude_mean,Latitude_mean)	Spatial (longitude x latitude)	smooth	NA	NA	2.0179	9.85832e-06	7.73694	24
TSN stock 30-60 cm	Grazing (Y/N)	0.624474	s(silt_farm_mean_mean)	Silt (%)	smooth	NA	NA	0.352903	0.0615094	0.679306	6
TSN stock 30-60 cm	Grazing (Y/N)	0.624474	s(Ca_sat_0_15cm_mean)	Ca saturation 0-15 cm	smooth	NA	NA	0.0435608	0.269358	0.221764	6
TSN stock 30-60 cm	Conventional-Regenerative Classification	0.613584	(Intercept)	Intercept	parametric	3.44159	0.209647	16.4161	1.86738e-18	NA	NA
TSN stock 30-60 cm	Conventional-Regenerative Classification	0.613584	Score.Result_using_winter_cover_cropsRegenerative	Effect of management classification	parametric	0.193481	0.291207	0.664412	0.510594	NA	NA
TSN stock 30-60 cm	Conventional-Regenerative Classification	0.613584	Score.Result_using_winter_cover_cropsTransition	Effect of management classification	parametric	-0.213355	0.418095	-0.510302	0.612906	NA	NA
TSN stock 30-60 cm	Conventional-Regenerative Classification	0.613584	s(clay_farm_mean_mean)	Clay (%)	smooth	NA	NA	0.503108	0.0305889	0.75122	6
TSN stock 30-60 cm	Conventional-Regenerative Classification	0.613584	s(Longitude_mean,Latitude_mean)	Spatial (longitude x latitude)	smooth	NA	NA	1.88847	1.73236e-05	7.61958	24
TSN stock 30-60 cm	Conventional-Regenerative Classification	0.613584	s(silt_farm_mean_mean)	Silt (%)	smooth	NA	NA	0.293558	0.076218	0.63804	6
TSN stock 30-60 cm	Conventional-Regenerative Classification	0.613584	s(Ca_sat_0_15cm_mean)	Ca saturation 0-15 cm	smooth	NA	NA	0.0959108	0.220732	0.417082	6
TSN stock 0-60 cm	Grazing (Y/N)	0.738371	(Intercept)	Intercept	parametric	9.40589	0.259419	36.2575	5.5287e-30	NA	NA
TSN stock 0-60 cm	Grazing (Y/N)	0.738371	Grazing_Y_NNG	Effect of No Grazing (vs Grazing)	parametric	-1.05156	0.388696	-2.70535	0.0103504	NA	NA
TSN stock 0-60 cm	Grazing (Y/N)	0.738371	s(clay_farm_mean_mean)	Clay (%)	smooth	NA	NA	0.785126	0.0124778	0.824946	6
TSN stock 0-60 cm	Grazing (Y/N)	0.738371	s(Longitude_mean,Latitude_mean)	Spatial (longitude x latitude)	smooth	NA	NA	2.77574	1.06191e-06	8.84036	24
TSN stock 0-60 cm	Grazing (Y/N)	0.738371	s(silt_farm_mean_mean)	Silt (%)	smooth	NA	NA	0.29431	0.0749732	0.638481	6
TSN stock 0-60 cm	Grazing (Y/N)	0.738371	s(Ca_sat_0_15cm_mean)	Ca saturation 0-15 cm	smooth	NA	NA	0.172073	0.161721	0.614292	6
TSN stock 0-60 cm	Conventional-Regenerative Classification	0.71951	(Intercept)	Intercept	parametric	8.47029	0.36203	23.3966	4.75257e-23	NA	NA
TSN stock 0-60 cm	Conventional-Regenerative Classification	0.71951	Score.Result_using_winter_cover_cropsRegenerative	Effect of management classification	parametric	0.956116	0.503847	1.89763	0.065965	NA	NA
TSN stock 0-60 cm	Conventional-Regenerative Classification	0.71951	Score.Result_using_winter_cover_cropsTransition	Effect of management classification	parametric	-0.184009	0.731403	-0.251584	0.802825	NA	NA
TSN stock 0-60 cm	Conventional-Regenerative Classification	0.71951	s(clay_farm_mean_mean)	Clay (%)	smooth	NA	NA	0.583889	0.024512	0.77799	6
TSN stock 0-60 cm	Conventional-Regenerative Classification	0.71951	s(Longitude_mean,Latitude_mean)	Spatial (longitude x latitude)	smooth	NA	NA	2.40268	4.26517e-06	8.65364	24
TSN stock 0-60 cm	Conventional-Regenerative Classification	0.71951	s(silt_farm_mean_mean)	Silt (%)	smooth	NA	NA	0.276788	0.0794916	0.624217	6
TSN stock 0-60 cm	Conventional-Regenerative Classification	0.71951	s(Ca_sat_0_15cm_mean)	Ca saturation 0-15 cm	smooth	NA	NA	0.225148	0.13403	0.719713	6
TSN RZE 0-15 cm	Grazing (Y/N)	0.743044	(Intercept)	Intercept	parametric	1.37434	0.0497121	27.646	1.4924e-26	NA	NA
TSN RZE 0-15 cm	Grazing (Y/N)	0.743044	Grazing_Y_NNG	Effect of No Grazing (vs Grazing)	parametric	-0.342616	0.0745176	-4.59778	4.73011e-05	NA	NA
TSN RZE 0-15 cm	Grazing (Y/N)	0.743044	s(clay_farm_mean_mean)	Clay (%)	smooth	NA	NA	2.3557e-07	0.907913	1.55008e-05	6
TSN RZE 0-15 cm	Grazing (Y/N)	0.743044	s(Longitude_mean,Latitude_mean)	Spatial (longitude x latitude)	smooth	NA	NA	2.10095	3.87848e-07	4.68889	24
TSN RZE 0-15 cm	Grazing (Y/N)	0.743044	s(silt_farm_mean_mean)	Silt (%)	smooth	NA	NA	1.01316	0.0153429	1.54767	6
TSN RZE 0-15 cm	Grazing (Y/N)	0.743044	s(Ca_sat_0_15cm_mean)	Ca saturation 0-15 cm	smooth	NA	NA	2.38168	0.00297512	3.24221	6
TSN RZE 0-15 cm	Conventional-Regenerative Classification	0.654201	(Intercept)	Intercept	parametric	1.04813	0.0725616	14.4447	2.06023e-17	NA	NA
TSN RZE 0-15 cm	Conventional-Regenerative Classification	0.654201	Score.Result_using_winter_cover_cropsRegenerative	Effect of management classification	parametric	0.359209	0.0995303	3.60904	0.000849519	NA	NA
TSN RZE 0-15 cm	Conventional-Regenerative Classification	0.654201	Score.Result_using_winter_cover_cropsTransition	Effect of management classification	parametric	-0.0738218	0.140335	-0.526041	0.601781	NA	NA
TSN RZE 0-15 cm	Conventional-Regenerative Classification	0.654201	s(clay_farm_mean_mean)	Clay (%)	smooth	NA	NA	1.00114e-06	0.748773	2.5467e-05	6
TSN RZE 0-15 cm	Conventional-Regenerative Classification	0.654201	s(Longitude_mean,Latitude_mean)	Spatial (longitude x latitude)	smooth	NA	NA	1.4955	3.66868e-06	3.839	24
TSN RZE 0-15 cm	Conventional-Regenerative Classification	0.654201	s(silt_farm_mean_mean)	Silt (%)	smooth	NA	NA	1.14592	0.0112389	1.60633	6
TSN RZE 0-15 cm	Conventional-Regenerative Classification	0.654201	s(Ca_sat_0_15cm_mean)	Ca saturation 0-15 cm	smooth	NA	NA	0.272652	0.121292	0.782909	6
TSN RZE 15-30 cm	Grazing (Y/N)	0.588233	(Intercept)	Intercept	parametric	0.283123	0.0133845	21.1531	5.30015e-24	NA	NA
TSN RZE 15-30 cm	Grazing (Y/N)	0.588233	Grazing_Y_NNG	Effect of No Grazing (vs Grazing)	parametric	-0.0725018	0.0196696	-3.68598	0.000647661	NA	NA
TSN RZE 15-30 cm	Grazing (Y/N)	0.588233	s(clay_farm_mean_mean)	Clay (%)	smooth	NA	NA	0.0994632	0.193598	0.427612	6
TSN RZE 15-30 cm	Grazing (Y/N)	0.588233	s(Longitude_mean,Latitude_mean)	Spatial (longitude x latitude)	smooth	NA	NA	2.03825	7.95546e-07	4.61263	24
TSN RZE 15-30 cm	Grazing (Y/N)	0.588233	s(silt_farm_mean_mean)	Silt (%)	smooth	NA	NA	2.13471e-06	0.667348	3.61738e-05	6
TSN RZE 15-30 cm	Grazing (Y/N)	0.588233	s(Ca_sat_0_15cm_mean)	Ca saturation 0-15 cm	smooth	NA	NA	1.01545e-06	0.65222	1.66926e-05	6
TSN RZE 15-30 cm	Conventional-Regenerative Classification	0.594715	(Intercept)	Intercept	parametric	0.193926	0.0166666	11.6356	8.39228e-15	NA	NA
TSN RZE 15-30 cm	Conventional-Regenerative Classification	0.594715	Score.Result_using_winter_cover_cropsRegenerative	Effect of management classification	parametric	0.102307	0.0226953	4.50783	5.06753e-05	NA	NA
TSN RZE 15-30 cm	Conventional-Regenerative Classification	0.594715	Score.Result_using_winter_cover_cropsTransition	Effect of management classification	parametric	0.0353912	0.0320359	1.10474	0.275485	NA	NA
TSN RZE 15-30 cm	Conventional-Regenerative Classification	0.594715	s(clay_farm_mean_mean)	Clay (%)	smooth	NA	NA	6.84272e-06	0.464821	6.87313e-05	6
TSN RZE 15-30 cm	Conventional-Regenerative Classification	0.594715	s(Longitude_mean,Latitude_mean)	Spatial (longitude x latitude)	smooth	NA	NA	1.27217	1.28253e-05	3.46461	24
TSN RZE 15-30 cm	Conventional-Regenerative Classification	0.594715	s(silt_farm_mean_mean)	Silt (%)	smooth	NA	NA	6.98489e-07	0.838699	2.6781e-05	6
TSN RZE 15-30 cm	Conventional-Regenerative Classification	0.594715	s(Ca_sat_0_15cm_mean)	Ca saturation 0-15 cm	smooth	NA	NA	5.24095e-07	0.817933	2.0281e-05	6
TSN RZE 0-30 cm	Grazing (Y/N)	0.80585	(Intercept)	Intercept	parametric	1.65079	0.0507756	32.5114	2.98122e-28	NA	NA
TSN RZE 0-30 cm	Grazing (Y/N)	0.80585	Grazing_Y_NNG	Effect of No Grazing (vs Grazing)	parametric	-0.400894	0.0768625	-5.21573	7.78941e-06	NA	NA
TSN RZE 0-30 cm	Grazing (Y/N)	0.80585	s(clay_farm_mean_mean)	Clay (%)	smooth	NA	NA	1.42134e-06	0.5783	2.02287e-05	6
TSN RZE 0-30 cm	Grazing (Y/N)	0.80585	s(Longitude_mean,Latitude_mean)	Spatial (longitude x latitude)	smooth	NA	NA	2.75122	0	5.59874	24
TSN RZE 0-30 cm	Grazing (Y/N)	0.80585	s(silt_farm_mean_mean)	Silt (%)	smooth	NA	NA	0.752552	0.0298736	1.37943	6
TSN RZE 0-30 cm	Grazing (Y/N)	0.80585	s(Ca_sat_0_15cm_mean)	Ca saturation 0-15 cm	smooth	NA	NA	3.50412	0.000628411	4.0747	6
TSN RZE 0-30 cm	Conventional-Regenerative Classification	0.699801	(Intercept)	Intercept	parametric	1.24259	0.0789962	15.7297	1.32359e-18	NA	NA
TSN RZE 0-30 cm	Conventional-Regenerative Classification	0.699801	Score.Result_using_winter_cover_cropsRegenerative	Effect of management classification	parametric	0.458048	0.108414	4.22501	0.000136496	NA	NA
TSN RZE 0-30 cm	Conventional-Regenerative Classification	0.699801	Score.Result_using_winter_cover_cropsTransition	Effect of management classification	parametric	-0.0302658	0.153352	-0.197362	0.844556	NA	NA
TSN RZE 0-30 cm	Conventional-Regenerative Classification	0.699801	s(clay_farm_mean_mean)	Clay (%)	smooth	NA	NA	2.65655e-07	0.934325	2.16585e-05	6
TSN RZE 0-30 cm	Conventional-Regenerative Classification	0.699801	s(Longitude_mean,Latitude_mean)	Spatial (longitude x latitude)	smooth	NA	NA	1.85281	5.74776e-07	4.03992	24
TSN RZE 0-30 cm	Conventional-Regenerative Classification	0.699801	s(silt_farm_mean_mean)	Silt (%)	smooth	NA	NA	0.999243	0.0162526	1.53075	6
TSN RZE 0-30 cm	Conventional-Regenerative Classification	0.699801	s(Ca_sat_0_15cm_mean)	Ca saturation 0-15 cm	smooth	NA	NA	0.318141	0.118008	0.922995	6
TSN RZE 30-60 cm	Grazing (Y/N)	0.12331	(Intercept)	Intercept	parametric	0.264864	0.0432275	6.12722	2.03061e-07	NA	NA
TSN RZE 30-60 cm	Grazing (Y/N)	0.12331	Grazing_Y_NNG	Effect of No Grazing (vs Grazing)	parametric	0.0231509	0.0633042	0.365709	0.716298	NA	NA
TSN RZE 30-60 cm	Grazing (Y/N)	0.12331	s(clay_farm_mean_mean)	Clay (%)	smooth	NA	NA	0.723044	0.0339914	1.24116	6
TSN RZE 30-60 cm	Grazing (Y/N)	0.12331	s(Longitude_mean,Latitude_mean)	Spatial (longitude x latitude)	smooth	NA	NA	0.0926529	0.0815223	0.818512	24
TSN RZE 30-60 cm	Grazing (Y/N)	0.12331	s(silt_farm_mean_mean)	Silt (%)	smooth	NA	NA	7.35179e-08	0.616875	1.18203e-06	6
TSN RZE 30-60 cm	Grazing (Y/N)	0.12331	s(Ca_sat_0_15cm_mean)	Ca saturation 0-15 cm	smooth	NA	NA	5.0578e-08	0.71403	1.06536e-06	6
TSN RZE 30-60 cm	Conventional-Regenerative Classification	0.173475	(Intercept)	Intercept	parametric	0.228179	0.0521863	4.37239	7.46365e-05	NA	NA
TSN RZE 30-60 cm	Conventional-Regenerative Classification	0.173475	Score.Result_using_winter_cover_cropsRegenerative	Effect of management classification	parametric	0.0433317	0.0708125	0.611921	0.543754	NA	NA
TSN RZE 30-60 cm	Conventional-Regenerative Classification	0.173475	Score.Result_using_winter_cover_cropsTransition	Effect of management classification	parametric	0.184298	0.098242	1.87596	0.0673349	NA	NA
TSN RZE 30-60 cm	Conventional-Regenerative Classification	0.173475	s(clay_farm_mean_mean)	Clay (%)	smooth	NA	NA	0.685822	0.0363497	1.18676	6
TSN RZE 30-60 cm	Conventional-Regenerative Classification	0.173475	s(Longitude_mean,Latitude_mean)	Spatial (longitude x latitude)	smooth	NA	NA	0.163062	0.0335929	1.01344	24
TSN RZE 30-60 cm	Conventional-Regenerative Classification	0.173475	s(silt_farm_mean_mean)	Silt (%)	smooth	NA	NA	5.99861e-07	0.366605	4.08182e-06	6
TSN RZE 30-60 cm	Conventional-Regenerative Classification	0.173475	s(Ca_sat_0_15cm_mean)	Ca saturation 0-15 cm	smooth	NA	NA	9.64654e-08	0.549205	1.31165e-06	6
TSN RZE 0-60 cm	Grazing (Y/N)	0.711932	(Intercept)	Intercept	parametric	1.92868	0.0662929	29.0933	7.82273e-29	NA	NA
TSN RZE 0-60 cm	Grazing (Y/N)	0.711932	Grazing_Y_NNG	Effect of No Grazing (vs Grazing)	parametric	-0.405495	0.0977435	-4.14856	0.000166084	NA	NA
TSN RZE 0-60 cm	Grazing (Y/N)	0.711932	s(clay_farm_mean_mean)	Clay (%)	smooth	NA	NA	0.0810628	0.206624	0.368825	6
TSN RZE 0-60 cm	Grazing (Y/N)	0.711932	s(Longitude_mean,Latitude_mean)	Spatial (longitude x latitude)	smooth	NA	NA	3.46658	0	4.95676	24
TSN RZE 0-60 cm	Grazing (Y/N)	0.711932	s(silt_farm_mean_mean)	Silt (%)	smooth	NA	NA	0.400751	0.0848113	1.02865	6
TSN RZE 0-60 cm	Grazing (Y/N)	0.711932	s(Ca_sat_0_15cm_mean)	Ca saturation 0-15 cm	smooth	NA	NA	6.11432e-06	0.374172	4.39639e-05	6
TSN RZE 0-60 cm	Conventional-Regenerative Classification	0.694415	(Intercept)	Intercept	parametric	1.46707	0.0868441	16.8931	4.40693e-20	NA	NA
TSN RZE 0-60 cm	Conventional-Regenerative Classification	0.694415	Score.Result_using_winter_cover_cropsRegenerative	Effect of management classification	parametric	0.503616	0.118951	4.23383	0.000126209	NA	NA
TSN RZE 0-60 cm	Conventional-Regenerative Classification	0.694415	Score.Result_using_winter_cover_cropsTransition	Effect of management classification	parametric	0.172238	0.16784	1.0262	0.310809	NA	NA
TSN RZE 0-60 cm	Conventional-Regenerative Classification	0.694415	s(clay_farm_mean_mean)	Clay (%)	smooth	NA	NA	4.07253e-06	0.397533	3.3484e-05	6
TSN RZE 0-60 cm	Conventional-Regenerative Classification	0.694415	s(Longitude_mean,Latitude_mean)	Spatial (longitude x latitude)	smooth	NA	NA	2.37162	0	4.19619	24
TSN RZE 0-60 cm	Conventional-Regenerative Classification	0.694415	s(silt_farm_mean_mean)	Silt (%)	smooth	NA	NA	0.244949	0.136826	0.776334	6
TSN RZE 0-60 cm	Conventional-Regenerative Classification	0.694415	s(Ca_sat_0_15cm_mean)	Ca saturation 0-15 cm	smooth	NA	NA	3.28932e-06	0.531596	3.91333e-05	6
MAOC baseline 0-15 cm	Grazing (Y/N)	0.678474	(Intercept)	Intercept	parametric	16.0228	0.664337	24.1184	1.73201e-24	NA	NA
MAOC baseline 0-15 cm	Grazing (Y/N)	0.678474	Grazing_Y_NNG	Effect of No Grazing (vs Grazing)	parametric	-1.2095	0.985962	-1.22672	0.227549	NA	NA
MAOC baseline 0-15 cm	Grazing (Y/N)	0.678474	s(clay_farm_mean_mean)	Clay (%)	smooth	NA	NA	4.48391	1.15608e-06	0.964205	6
MAOC baseline 0-15 cm	Grazing (Y/N)	0.678474	s(Longitude_mean,Latitude_mean)	Spatial (longitude x latitude)	smooth	NA	NA	1.18347	0.000428517	6.08406	24
MAOC baseline 0-15 cm	Grazing (Y/N)	0.678474	s(silt_farm_mean_mean)	Silt (%)	smooth	NA	NA	7.47445e-07	0.838771	2.68423e-05	6
MAOC baseline 0-15 cm	Grazing (Y/N)	0.678474	s(Ca_sat_0_15cm_mean)	Ca saturation 0-15 cm	smooth	NA	NA	0.0659493	0.260295	0.323368	6
MAOC baseline 0-15 cm	Conventional-Regenerative Classification	0.655896	(Intercept)	Intercept	parametric	15.0642	0.928451	16.2251	2.03053e-18	NA	NA
MAOC baseline 0-15 cm	Conventional-Regenerative Classification	0.655896	Score.Result_using_winter_cover_cropsRegenerative	Effect of management classification	parametric	0.67236	1.24722	0.539087	0.593052	NA	NA
MAOC baseline 0-15 cm	Conventional-Regenerative Classification	0.655896	Score.Result_using_winter_cover_cropsTransition	Effect of management classification	parametric	0.329771	1.74341	0.189153	0.851005	NA	NA
MAOC baseline 0-15 cm	Conventional-Regenerative Classification	0.655896	s(clay_farm_mean_mean)	Clay (%)	smooth	NA	NA	4.11708	2.17407e-06	0.961159	6
MAOC baseline 0-15 cm	Conventional-Regenerative Classification	0.655896	s(Longitude_mean,Latitude_mean)	Spatial (longitude x latitude)	smooth	NA	NA	0.95074	0.00188449	5.80292	24
MAOC baseline 0-15 cm	Conventional-Regenerative Classification	0.655896	s(silt_farm_mean_mean)	Silt (%)	smooth	NA	NA	1.063e-07	0.752762	2.95566e-06	6
MAOC baseline 0-15 cm	Conventional-Regenerative Classification	0.655896	s(Ca_sat_0_15cm_mean)	Ca saturation 0-15 cm	smooth	NA	NA	0.0356389	0.284707	0.189413	6
MAOC baseline 15-30 cm	Grazing (Y/N)	0.678474	(Intercept)	Intercept	parametric	16.0228	0.664337	24.1184	1.73201e-24	NA	NA
MAOC baseline 15-30 cm	Grazing (Y/N)	0.678474	Grazing_Y_NNG	Effect of No Grazing (vs Grazing)	parametric	-1.2095	0.985962	-1.22672	0.227549	NA	NA
MAOC baseline 15-30 cm	Grazing (Y/N)	0.678474	s(clay_farm_mean_mean)	Clay (%)	smooth	NA	NA	4.48391	1.15608e-06	0.964205	6
MAOC baseline 15-30 cm	Grazing (Y/N)	0.678474	s(Longitude_mean,Latitude_mean)	Spatial (longitude x latitude)	smooth	NA	NA	1.18347	0.000428517	6.08406	24
MAOC baseline 15-30 cm	Grazing (Y/N)	0.678474	s(silt_farm_mean_mean)	Silt (%)	smooth	NA	NA	7.47445e-07	0.838771	2.68423e-05	6
MAOC baseline 15-30 cm	Grazing (Y/N)	0.678474	s(Ca_sat_0_15cm_mean)	Ca saturation 0-15 cm	smooth	NA	NA	0.0659493	0.260295	0.323368	6
MAOC baseline 15-30 cm	Conventional-Regenerative Classification	0.655896	(Intercept)	Intercept	parametric	15.0642	0.928451	16.2251	2.03053e-18	NA	NA
MAOC baseline 15-30 cm	Conventional-Regenerative Classification	0.655896	Score.Result_using_winter_cover_cropsRegenerative	Effect of management classification	parametric	0.67236	1.24722	0.539087	0.593052	NA	NA
MAOC baseline 15-30 cm	Conventional-Regenerative Classification	0.655896	Score.Result_using_winter_cover_cropsTransition	Effect of management classification	parametric	0.329771	1.74341	0.189153	0.851005	NA	NA
MAOC baseline 15-30 cm	Conventional-Regenerative Classification	0.655896	s(clay_farm_mean_mean)	Clay (%)	smooth	NA	NA	4.11708	2.17407e-06	0.961159	6
MAOC baseline 15-30 cm	Conventional-Regenerative Classification	0.655896	s(Longitude_mean,Latitude_mean)	Spatial (longitude x latitude)	smooth	NA	NA	0.95074	0.00188449	5.80292	24
MAOC baseline 15-30 cm	Conventional-Regenerative Classification	0.655896	s(silt_farm_mean_mean)	Silt (%)	smooth	NA	NA	1.063e-07	0.752762	2.95566e-06	6
MAOC baseline 15-30 cm	Conventional-Regenerative Classification	0.655896	s(Ca_sat_0_15cm_mean)	Ca saturation 0-15 cm	smooth	NA	NA	0.0356389	0.284707	0.189413	6
MAOC baseline 0-30 cm	Grazing (Y/N)	0.678474	(Intercept)	Intercept	parametric	32.0456	1.32868	24.1184	1.73225e-24	NA	NA
MAOC baseline 0-30 cm	Grazing (Y/N)	0.678474	Grazing_Y_NNG	Effect of No Grazing (vs Grazing)	parametric	-2.419	1.97193	-1.22672	0.227549	NA	NA
MAOC baseline 0-30 cm	Grazing (Y/N)	0.678474	s(clay_farm_mean_mean)	Clay (%)	smooth	NA	NA	4.48391	1.15612e-06	0.964279	6
MAOC baseline 0-30 cm	Grazing (Y/N)	0.678474	s(Longitude_mean,Latitude_mean)	Spatial (longitude x latitude)	smooth	NA	NA	1.18345	0.000428508	6.08404	24
MAOC baseline 0-30 cm	Grazing (Y/N)	0.678474	s(silt_farm_mean_mean)	Silt (%)	smooth	NA	NA	2.03178e-06	0.838772	7.29655e-05	6
MAOC baseline 0-30 cm	Grazing (Y/N)	0.678474	s(Ca_sat_0_15cm_mean)	Ca saturation 0-15 cm	smooth	NA	NA	0.0659491	0.260296	0.323368	6
MAOC baseline 0-30 cm	Conventional-Regenerative Classification	0.655895	(Intercept)	Intercept	parametric	30.1284	1.85691	16.225	2.03092e-18	NA	NA
MAOC baseline 0-30 cm	Conventional-Regenerative Classification	0.655895	Score.Result_using_winter_cover_cropsRegenerative	Effect of management classification	parametric	1.34473	2.49445	0.53909	0.59305	NA	NA
MAOC baseline 0-30 cm	Conventional-Regenerative Classification	0.655895	Score.Result_using_winter_cover_cropsTransition	Effect of management classification	parametric	0.659557	3.48682	0.189157	0.851002	NA	NA
MAOC baseline 0-30 cm	Conventional-Regenerative Classification	0.655895	s(clay_farm_mean_mean)	Clay (%)	smooth	NA	NA	4.11708	2.17421e-06	0.961273	6
MAOC baseline 0-30 cm	Conventional-Regenerative Classification	0.655895	s(Longitude_mean,Latitude_mean)	Spatial (longitude x latitude)	smooth	NA	NA	0.950728	0.00188445	5.8029	24
MAOC baseline 0-30 cm	Conventional-Regenerative Classification	0.655895	s(silt_farm_mean_mean)	Silt (%)	smooth	NA	NA	2.88955e-07	0.752762	8.03432e-06	6
MAOC baseline 0-30 cm	Conventional-Regenerative Classification	0.655895	s(Ca_sat_0_15cm_mean)	Ca saturation 0-15 cm	smooth	NA	NA	0.035639	0.284708	0.189415	6
MAOC baseline 0-60 cm	Grazing (Y/N)	0.469287	(Intercept)	Intercept	parametric	48.0212	3.16866	15.155	3.12873e-18	NA	NA
MAOC baseline 0-60 cm	Grazing (Y/N)	0.469287	Grazing_Y_NNG	Effect of No Grazing (vs Grazing)	parametric	-3.55605	4.65653	-0.763671	0.449516	NA	NA
MAOC baseline 0-60 cm	Grazing (Y/N)	0.469287	s(clay_farm_mean_mean)	Clay (%)	smooth	NA	NA	3.45715	1.01287e-05	0.954029	6
MAOC baseline 0-60 cm	Grazing (Y/N)	0.469287	s(Longitude_mean,Latitude_mean)	Spatial (longitude x latitude)	smooth	NA	NA	0.540022	0.0111536	3.78771	24
MAOC baseline 0-60 cm	Grazing (Y/N)	0.469287	s(silt_farm_mean_mean)	Silt (%)	smooth	NA	NA	2.72141e-06	0.601355	3.96502e-05	6
MAOC baseline 0-60 cm	Grazing (Y/N)	0.469287	s(Ca_sat_0_15cm_mean)	Ca saturation 0-15 cm	smooth	NA	NA	5.83096e-06	0.456417	5.17322e-05	6
MAOC baseline 0-60 cm	Conventional-Regenerative Classification	0.456611	(Intercept)	Intercept	parametric	47.2252	4.2512	11.1087	1.10523e-13	NA	NA
MAOC baseline 0-60 cm	Conventional-Regenerative Classification	0.456611	Score.Result_using_winter_cover_cropsRegenerative	Effect of management classification	parametric	-0.668889	5.66367	-0.118102	0.90659	NA	NA
MAOC baseline 0-60 cm	Conventional-Regenerative Classification	0.456611	Score.Result_using_winter_cover_cropsTransition	Effect of management classification	parametric	-3.53795	7.82743	-0.451994	0.653762	NA	NA
MAOC baseline 0-60 cm	Conventional-Regenerative Classification	0.456611	s(clay_farm_mean_mean)	Clay (%)	smooth	NA	NA	3.31082	1.44495e-05	0.95209	6
MAOC baseline 0-60 cm	Conventional-Regenerative Classification	0.456611	s(Longitude_mean,Latitude_mean)	Spatial (longitude x latitude)	smooth	NA	NA	0.519215	0.0139605	3.80711	24
MAOC baseline 0-60 cm	Conventional-Regenerative Classification	0.456611	s(silt_farm_mean_mean)	Silt (%)	smooth	NA	NA	1.22853e-05	0.603564	0.00016289	6
MAOC baseline 0-60 cm	Conventional-Regenerative Classification	0.456611	s(Ca_sat_0_15cm_mean)	Ca saturation 0-15 cm	smooth	NA	NA	7.03706e-06	0.452723	6.11804e-05	6
MAOC baseline 30-60 cm	Grazing (Y/N)	0.469287	(Intercept)	Intercept	parametric	24.0106	1.58433	15.155	3.12867e-18	NA	NA
MAOC baseline 30-60 cm	Grazing (Y/N)	0.469287	Grazing_Y_NNG	Effect of No Grazing (vs Grazing)	parametric	-1.77803	2.32826	-0.76367	0.449516	NA	NA
MAOC baseline 30-60 cm	Grazing (Y/N)	0.469287	s(clay_farm_mean_mean)	Clay (%)	smooth	NA	NA	3.45715	1.01288e-05	0.95403	6
MAOC baseline 30-60 cm	Grazing (Y/N)	0.469287	s(Longitude_mean,Latitude_mean)	Spatial (longitude x latitude)	smooth	NA	NA	0.540024	0.0111537	3.78771	24
MAOC baseline 30-60 cm	Grazing (Y/N)	0.469287	s(silt_farm_mean_mean)	Silt (%)	smooth	NA	NA	2.46083e-06	0.567529	3.00409e-05	6
MAOC baseline 30-60 cm	Grazing (Y/N)	0.469287	s(Ca_sat_0_15cm_mean)	Ca saturation 0-15 cm	smooth	NA	NA	1.8103e-06	0.522985	2.10978e-05	6
MAOC baseline 30-60 cm	Conventional-Regenerative Classification	0.456611	(Intercept)	Intercept	parametric	23.6126	2.1256	11.1087	1.10523e-13	NA	NA
MAOC baseline 30-60 cm	Conventional-Regenerative Classification	0.456611	Score.Result_using_winter_cover_cropsRegenerative	Effect of management classification	parametric	-0.334444	2.83184	-0.118102	0.90659	NA	NA
MAOC baseline 30-60 cm	Conventional-Regenerative Classification	0.456611	Score.Result_using_winter_cover_cropsTransition	Effect of management classification	parametric	-1.76897	3.91371	-0.451994	0.653762	NA	NA
MAOC baseline 30-60 cm	Conventional-Regenerative Classification	0.456611	s(clay_farm_mean_mean)	Clay (%)	smooth	NA	NA	3.31082	1.44495e-05	0.95209	6
MAOC baseline 30-60 cm	Conventional-Regenerative Classification	0.456611	s(Longitude_mean,Latitude_mean)	Spatial (longitude x latitude)	smooth	NA	NA	0.519215	0.0139605	3.80711	24
MAOC baseline 30-60 cm	Conventional-Regenerative Classification	0.456611	s(silt_farm_mean_mean)	Silt (%)	smooth	NA	NA	1.22853e-05	0.603564	0.00016289	6
MAOC baseline 30-60 cm	Conventional-Regenerative Classification	0.456611	s(Ca_sat_0_15cm_mean)	Ca saturation 0-15 cm	smooth	NA	NA	7.03706e-06	0.452723	6.11804e-05	6
MAOC stock 0-15 cm	Grazing (Y/N)	0.872968	(Intercept)	Intercept	parametric	25.7387	0.519227	49.5713	2.83535e-31	NA	NA
MAOC stock 0-15 cm	Grazing (Y/N)	0.872968	Grazing_Y_NNG	Effect of No Grazing (vs Grazing)	parametric	-2.86787	0.796783	-3.59931	0.00108839	NA	NA
MAOC stock 0-15 cm	Grazing (Y/N)	0.872968	s(clay_farm_mean_mean)	Clay (%)	smooth	NA	NA	3.71023	1.71693e-05	1.56047	6
MAOC stock 0-15 cm	Grazing (Y/N)	0.872968	s(Longitude_mean,Latitude_mean)	Spatial (longitude x latitude)	smooth	NA	NA	4.0804	0	9.98951	24
MAOC stock 0-15 cm	Grazing (Y/N)	0.872968	s(silt_farm_mean_mean)	Silt (%)	smooth	NA	NA	0.30403	0.10238	0.893417	6
MAOC stock 0-15 cm	Grazing (Y/N)	0.872968	s(Ca_sat_0_15cm_mean)	Ca saturation 0-15 cm	smooth	NA	NA	0.760667	0.0233409	1.31152	6
MAOC stock 0-15 cm	Conventional-Regenerative Classification	0.777545	(Intercept)	Intercept	parametric	23.232	0.859917	27.0166	4.31881e-27	NA	NA
MAOC stock 0-15 cm	Conventional-Regenerative Classification	0.777545	Score.Result_using_winter_cover_cropsRegenerative	Effect of management classification	parametric	2.2506	1.14479	1.96595	0.0563578	NA	NA
MAOC stock 0-15 cm	Conventional-Regenerative Classification	0.777545	Score.Result_using_winter_cover_cropsTransition	Effect of management classification	parametric	0.101279	1.5672	0.0646241	0.948799	NA	NA
MAOC stock 0-15 cm	Conventional-Regenerative Classification	0.777545	s(clay_farm_mean_mean)	Clay (%)	smooth	NA	NA	6.35354	0	0.974451	6
MAOC stock 0-15 cm	Conventional-Regenerative Classification	0.777545	s(Longitude_mean,Latitude_mean)	Spatial (longitude x latitude)	smooth	NA	NA	1.68774	5.16635e-07	1.92505	24
MAOC stock 0-15 cm	Conventional-Regenerative Classification	0.777545	s(silt_farm_mean_mean)	Silt (%)	smooth	NA	NA	0.546462	0.0577156	1.11919	6
MAOC stock 0-15 cm	Conventional-Regenerative Classification	0.777545	s(Ca_sat_0_15cm_mean)	Ca saturation 0-15 cm	smooth	NA	NA	0.105866	0.245233	0.463826	6
MAOC stock 15-30 cm	Grazing (Y/N)	0.739806	(Intercept)	Intercept	parametric	18.3941	0.625017	29.4297	3.26756e-27	NA	NA
MAOC stock 15-30 cm	Grazing (Y/N)	0.739806	Grazing_Y_NNG	Effect of No Grazing (vs Grazing)	parametric	-1.73844	0.929619	-1.87006	0.0694304	NA	NA
MAOC stock 15-30 cm	Grazing (Y/N)	0.739806	s(clay_farm_mean_mean)	Clay (%)	smooth	NA	NA	5.30956	3.80597e-07	0.969686	6
MAOC stock 15-30 cm	Grazing (Y/N)	0.739806	s(Longitude_mean,Latitude_mean)	Spatial (longitude x latitude)	smooth	NA	NA	1.43704	9.73643e-05	6.29057	24
MAOC stock 15-30 cm	Grazing (Y/N)	0.739806	s(silt_farm_mean_mean)	Silt (%)	smooth	NA	NA	1.1694e-07	0.859491	5.73382e-06	6
MAOC stock 15-30 cm	Grazing (Y/N)	0.739806	s(Ca_sat_0_15cm_mean)	Ca saturation 0-15 cm	smooth	NA	NA	0.24597	0.159964	0.862148	6
MAOC stock 15-30 cm	Conventional-Regenerative Classification	0.714882	(Intercept)	Intercept	parametric	16.7607	0.887723	18.8806	2.1587e-20	NA	NA
MAOC stock 15-30 cm	Conventional-Regenerative Classification	0.714882	Score.Result_using_winter_cover_cropsRegenerative	Effect of management classification	parametric	1.41396	1.19184	1.18637	0.243163	NA	NA
MAOC stock 15-30 cm	Conventional-Regenerative Classification	0.714882	Score.Result_using_winter_cover_cropsTransition	Effect of management classification	parametric	0.655147	1.68016	0.38993	0.698861	NA	NA
MAOC stock 15-30 cm	Conventional-Regenerative Classification	0.714882	s(clay_farm_mean_mean)	Clay (%)	smooth	NA	NA	4.633	9.23443e-07	0.965344	6
MAOC stock 15-30 cm	Conventional-Regenerative Classification	0.714882	s(Longitude_mean,Latitude_mean)	Spatial (longitude x latitude)	smooth	NA	NA	1.0943	0.000735676	5.97012	24
MAOC stock 15-30 cm	Conventional-Regenerative Classification	0.714882	s(silt_farm_mean_mean)	Silt (%)	smooth	NA	NA	2.11741e-07	0.815012	6.95526e-06	6
MAOC stock 15-30 cm	Conventional-Regenerative Classification	0.714882	s(Ca_sat_0_15cm_mean)	Ca saturation 0-15 cm	smooth	NA	NA	0.167229	0.195896	0.662181	6
MAOC stock 0-30 cm	Grazing (Y/N)	0.799387	(Intercept)	Intercept	parametric	43.8785	1.11862	39.2256	4.48915e-33	NA	NA
MAOC stock 0-30 cm	Grazing (Y/N)	0.799387	Grazing_Y_NNG	Effect of No Grazing (vs Grazing)	parametric	-4.06296	1.64787	-2.46559	0.0181592	NA	NA
MAOC stock 0-30 cm	Grazing (Y/N)	0.799387	s(clay_farm_mean_mean)	Clay (%)	smooth	NA	NA	9.49477	0	0.982797	6
MAOC stock 0-30 cm	Grazing (Y/N)	0.799387	s(Longitude_mean,Latitude_mean)	Spatial (longitude x latitude)	smooth	NA	NA	2.12307	2.48962e-07	3.28455	24
MAOC stock 0-30 cm	Grazing (Y/N)	0.799387	s(silt_farm_mean_mean)	Silt (%)	smooth	NA	NA	1.99956e-05	0.310408	0.000116198	6
MAOC stock 0-30 cm	Grazing (Y/N)	0.799387	s(Ca_sat_0_15cm_mean)	Ca saturation 0-15 cm	smooth	NA	NA	0.720721	0.0542943	1.52935	6
MAOC stock 0-30 cm	Conventional-Regenerative Classification	0.769138	(Intercept)	Intercept	parametric	39.9291	1.59456	25.0407	1.22736e-25	NA	NA
MAOC stock 0-30 cm	Conventional-Regenerative Classification	0.769138	Score.Result_using_winter_cover_cropsRegenerative	Effect of management classification	parametric	3.42848	2.11591	1.62034	0.113221	NA	NA
MAOC stock 0-30 cm	Conventional-Regenerative Classification	0.769138	Score.Result_using_winter_cover_cropsTransition	Effect of management classification	parametric	1.9933	2.95576	0.674377	0.504051	NA	NA
MAOC stock 0-30 cm	Conventional-Regenerative Classification	0.769138	s(clay_farm_mean_mean)	Clay (%)	smooth	NA	NA	8.46439	0	0.980699	6
MAOC stock 0-30 cm	Conventional-Regenerative Classification	0.769138	s(Longitude_mean,Latitude_mean)	Spatial (longitude x latitude)	smooth	NA	NA	1.46901	3.4856e-06	2.76474	24
MAOC stock 0-30 cm	Conventional-Regenerative Classification	0.769138	s(silt_farm_mean_mean)	Silt (%)	smooth	NA	NA	1.14171e-06	0.349329	7.57957e-06	6
MAOC stock 0-30 cm	Conventional-Regenerative Classification	0.769138	s(Ca_sat_0_15cm_mean)	Ca saturation 0-15 cm	smooth	NA	NA	0.484823	0.0968647	1.26745	6
MAOC stock 30-60 cm	Grazing (Y/N)	0.591533	(Intercept)	Intercept	parametric	27.2786	1.41198	19.3195	1.9826e-21	NA	NA
MAOC stock 30-60 cm	Grazing (Y/N)	0.591533	Grazing_Y_NNG	Effect of No Grazing (vs Grazing)	parametric	-1.96334	2.08899	-0.939852	0.353145	NA	NA
MAOC stock 30-60 cm	Grazing (Y/N)	0.591533	s(clay_farm_mean_mean)	Clay (%)	smooth	NA	NA	3.63983	5.81198e-06	0.956263	6
MAOC stock 30-60 cm	Grazing (Y/N)	0.591533	s(Longitude_mean,Latitude_mean)	Spatial (longitude x latitude)	smooth	NA	NA	0.898719	0.00217294	5.48792	24
MAOC stock 30-60 cm	Grazing (Y/N)	0.591533	s(silt_farm_mean_mean)	Silt (%)	smooth	NA	NA	1.16414e-06	0.887217	5.57917e-05	6
MAOC stock 30-60 cm	Grazing (Y/N)	0.591533	s(Ca_sat_0_15cm_mean)	Ca saturation 0-15 cm	smooth	NA	NA	9.26641e-06	0.391486	6.79044e-05	6
MAOC stock 30-60 cm	Conventional-Regenerative Classification	0.571912	(Intercept)	Intercept	parametric	26.2544	1.94249	13.5159	4.85026e-16	NA	NA
MAOC stock 30-60 cm	Conventional-Regenerative Classification	0.571912	Score.Result_using_winter_cover_cropsRegenerative	Effect of management classification	parametric	0.403233	2.6045	0.154821	0.877787	NA	NA
MAOC stock 30-60 cm	Conventional-Regenerative Classification	0.571912	Score.Result_using_winter_cover_cropsTransition	Effect of management classification	parametric	-0.676429	3.6283	-0.186431	0.853105	NA	NA
MAOC stock 30-60 cm	Conventional-Regenerative Classification	0.571912	s(clay_farm_mean_mean)	Clay (%)	smooth	NA	NA	3.43452	8.8169e-06	0.953787	6
MAOC stock 30-60 cm	Conventional-Regenerative Classification	0.571912	s(Longitude_mean,Latitude_mean)	Spatial (longitude x latitude)	smooth	NA	NA	0.768482	0.00522135	5.30329	24
MAOC stock 30-60 cm	Conventional-Regenerative Classification	0.571912	s(silt_farm_mean_mean)	Silt (%)	smooth	NA	NA	4.55253e-07	0.92994	3.17969e-05	6
MAOC stock 30-60 cm	Conventional-Regenerative Classification	0.571912	s(Ca_sat_0_15cm_mean)	Ca saturation 0-15 cm	smooth	NA	NA	3.06353e-06	0.416125	2.4528e-05	6
MAOC stock 0-60 cm	Grazing (Y/N)	0.714606	(Intercept)	Intercept	parametric	71.2925	2.43289	29.3037	2.56465e-27	NA	NA
MAOC stock 0-60 cm	Grazing (Y/N)	0.714606	Grazing_Y_NNG	Effect of No Grazing (vs Grazing)	parametric	-6.31563	3.61491	-1.7471	0.0888654	NA	NA
MAOC stock 0-60 cm	Grazing (Y/N)	0.714606	s(clay_farm_mean_mean)	Clay (%)	smooth	NA	NA	4.63088	9.71222e-07	0.96558	6
MAOC stock 0-60 cm	Grazing (Y/N)	0.714606	s(Longitude_mean,Latitude_mean)	Spatial (longitude x latitude)	smooth	NA	NA	1.28134	0.000250745	6.21698	24
MAOC stock 0-60 cm	Grazing (Y/N)	0.714606	s(silt_farm_mean_mean)	Silt (%)	smooth	NA	NA	6.57596e-07	0.799256	2.16769e-05	6
MAOC stock 0-60 cm	Grazing (Y/N)	0.714606	s(Ca_sat_0_15cm_mean)	Ca saturation 0-15 cm	smooth	NA	NA	0.141075	0.211435	0.589794	6
MAOC stock 0-60 cm	Conventional-Regenerative Classification	0.685351	(Intercept)	Intercept	parametric	66.2565	3.45266	19.19	8.79916e-21	NA	NA
MAOC stock 0-60 cm	Conventional-Regenerative Classification	0.685351	Score.Result_using_winter_cover_cropsRegenerative	Effect of management classification	parametric	4.07225	4.6374	0.878134	0.385557	NA	NA
MAOC stock 0-60 cm	Conventional-Regenerative Classification	0.685351	Score.Result_using_winter_cover_cropsTransition	Effect of management classification	parametric	0.00211133	6.49614	0.000325013	0.999742	NA	NA
MAOC stock 0-60 cm	Conventional-Regenerative Classification	0.685351	s(clay_farm_mean_mean)	Clay (%)	smooth	NA	NA	4.14198	2.06328e-06	0.961514	6
MAOC stock 0-60 cm	Conventional-Regenerative Classification	0.685351	s(Longitude_mean,Latitude_mean)	Spatial (longitude x latitude)	smooth	NA	NA	1.00184	0.00129219	5.84217	24
MAOC stock 0-60 cm	Conventional-Regenerative Classification	0.685351	s(silt_farm_mean_mean)	Silt (%)	smooth	NA	NA	4.65757e-07	0.864136	2.1998e-05	6
MAOC stock 0-60 cm	Conventional-Regenerative Classification	0.685351	s(Ca_sat_0_15cm_mean)	Ca saturation 0-15 cm	smooth	NA	NA	0.0658534	0.258732	0.321582	6
MAOC RZE 0-15 cm	Grazing (Y/N)	0.685965	(Intercept)	Intercept	parametric	9.5799	0.524297	18.2719	9.59303e-20	NA	NA
MAOC RZE 0-15 cm	Grazing (Y/N)	0.685965	Grazing_Y_NNG	Effect of No Grazing (vs Grazing)	parametric	-1.36772	0.787196	-1.73745	0.0908953	NA	NA
MAOC RZE 0-15 cm	Grazing (Y/N)	0.685965	s(clay_farm_mean_mean)	Clay (%)	smooth	NA	NA	3.57904e-06	0.836889	0.00013491	6
MAOC RZE 0-15 cm	Grazing (Y/N)	0.685965	s(Longitude_mean,Latitude_mean)	Spatial (longitude x latitude)	smooth	NA	NA	2.91147	3.96089e-07	7.50584	24
MAOC RZE 0-15 cm	Grazing (Y/N)	0.685965	s(silt_farm_mean_mean)	Silt (%)	smooth	NA	NA	1.25629	0.00796634	1.65704	6
MAOC RZE 0-15 cm	Grazing (Y/N)	0.685965	s(Ca_sat_0_15cm_mean)	Ca saturation 0-15 cm	smooth	NA	NA	6.65575e-07	0.496566	8.2402e-06	6
MAOC RZE 0-15 cm	Conventional-Regenerative Classification	0.597169	(Intercept)	Intercept	parametric	8.27944	0.779994	10.6147	7.08888e-13	NA	NA
MAOC RZE 0-15 cm	Conventional-Regenerative Classification	0.597169	Score.Result_using_winter_cover_cropsRegenerative	Effect of management classification	parametric	1.49519	1.04483	1.43103	0.16067	NA	NA
MAOC RZE 0-15 cm	Conventional-Regenerative Classification	0.597169	Score.Result_using_winter_cover_cropsTransition	Effect of management classification	parametric	-0.693195	1.44831	-0.478625	0.634973	NA	NA
MAOC RZE 0-15 cm	Conventional-Regenerative Classification	0.597169	s(clay_farm_mean_mean)	Clay (%)	smooth	NA	NA	0.109146	0.160561	0.395795	6
MAOC RZE 0-15 cm	Conventional-Regenerative Classification	0.597169	s(Longitude_mean,Latitude_mean)	Spatial (longitude x latitude)	smooth	NA	NA	1.39783	1.65619e-05	4.39343	24
MAOC RZE 0-15 cm	Conventional-Regenerative Classification	0.597169	s(silt_farm_mean_mean)	Silt (%)	smooth	NA	NA	1.1042	0.0121957	1.55451	6
MAOC RZE 0-15 cm	Conventional-Regenerative Classification	0.597169	s(Ca_sat_0_15cm_mean)	Ca saturation 0-15 cm	smooth	NA	NA	1.01765e-06	0.606434	1.5504e-05	6
MAOC RZE 15-30 cm	Grazing (Y/N)	0.698202	(Intercept)	Intercept	parametric	2.36241	0.111015	21.2801	8.09659e-23	NA	NA
MAOC RZE 15-30 cm	Grazing (Y/N)	0.698202	Grazing_Y_NNG	Effect of No Grazing (vs Grazing)	parametric	-0.509949	0.164535	-3.09933	0.00362683	NA	NA
MAOC RZE 15-30 cm	Grazing (Y/N)	0.698202	s(clay_farm_mean_mean)	Clay (%)	smooth	NA	NA	0.242783	0.123751	0.783917	6
MAOC RZE 15-30 cm	Grazing (Y/N)	0.698202	s(Longitude_mean,Latitude_mean)	Spatial (longitude x latitude)	smooth	NA	NA	3.01857	0	4.86026	24
MAOC RZE 15-30 cm	Grazing (Y/N)	0.698202	s(silt_farm_mean_mean)	Silt (%)	smooth	NA	NA	1.18078e-06	0.802557	3.52218e-05	6
MAOC RZE 15-30 cm	Grazing (Y/N)	0.698202	s(Ca_sat_0_15cm_mean)	Ca saturation 0-15 cm	smooth	NA	NA	0.282732	0.180521	1.0626	6
MAOC RZE 15-30 cm	Conventional-Regenerative Classification	0.705069	(Intercept)	Intercept	parametric	1.67328	0.144059	11.6152	2.40349e-14	NA	NA
MAOC RZE 15-30 cm	Conventional-Regenerative Classification	0.705069	Score.Result_using_winter_cover_cropsRegenerative	Effect of management classification	parametric	0.796303	0.191703	4.15384	0.000168358	NA	NA
MAOC RZE 15-30 cm	Conventional-Regenerative Classification	0.705069	Score.Result_using_winter_cover_cropsTransition	Effect of management classification	parametric	0.294121	0.267356	1.10011	0.277907	NA	NA
MAOC RZE 15-30 cm	Conventional-Regenerative Classification	0.705069	s(clay_farm_mean_mean)	Clay (%)	smooth	NA	NA	6.4701e-06	0.410369	5.32481e-05	6
MAOC RZE 15-30 cm	Conventional-Regenerative Classification	0.705069	s(Longitude_mean,Latitude_mean)	Spatial (longitude x latitude)	smooth	NA	NA	2.57334	0	4.28274	24
MAOC RZE 15-30 cm	Conventional-Regenerative Classification	0.705069	s(silt_farm_mean_mean)	Silt (%)	smooth	NA	NA	3.89657e-07	0.877288	1.73659e-05	6
MAOC RZE 15-30 cm	Conventional-Regenerative Classification	0.705069	s(Ca_sat_0_15cm_mean)	Ca saturation 0-15 cm	smooth	NA	NA	2.5983e-06	0.353457	1.70198e-05	6
MAOC RZE 0-30 cm	Grazing (Y/N)	0.731524	(Intercept)	Intercept	parametric	11.9332	0.562853	21.2013	6.20359e-22	NA	NA
MAOC RZE 0-30 cm	Grazing (Y/N)	0.731524	Grazing_Y_NNG	Effect of No Grazing (vs Grazing)	parametric	-1.85829	0.844354	-2.20085	0.0342422	NA	NA
MAOC RZE 0-30 cm	Grazing (Y/N)	0.731524	s(clay_farm_mean_mean)	Clay (%)	smooth	NA	NA	1.65275e-06	0.83792	6.25784e-05	6
MAOC RZE 0-30 cm	Grazing (Y/N)	0.731524	s(Longitude_mean,Latitude_mean)	Spatial (longitude x latitude)	smooth	NA	NA	3.67816	0	7.3751	24
MAOC RZE 0-30 cm	Grazing (Y/N)	0.731524	s(silt_farm_mean_mean)	Silt (%)	smooth	NA	NA	1.16648	0.009924	1.60847	6
MAOC RZE 0-30 cm	Grazing (Y/N)	0.731524	s(Ca_sat_0_15cm_mean)	Ca saturation 0-15 cm	smooth	NA	NA	1.00219e-06	0.540131	1.23904e-05	6
MAOC RZE 0-30 cm	Conventional-Regenerative Classification	0.678167	(Intercept)	Intercept	parametric	10.0387	0.817693	12.2769	1.20852e-14	NA	NA
MAOC RZE 0-30 cm	Conventional-Regenerative Classification	0.678167	Score.Result_using_winter_cover_cropsRegenerative	Effect of management classification	parametric	2.09476	1.09788	1.908	0.0641404	NA	NA
MAOC RZE 0-30 cm	Conventional-Regenerative Classification	0.678167	Score.Result_using_winter_cover_cropsTransition	Effect of management classification	parametric	-0.302091	1.52964	-0.197492	0.844519	NA	NA
MAOC RZE 0-30 cm	Conventional-Regenerative Classification	0.678167	s(clay_farm_mean_mean)	Clay (%)	smooth	NA	NA	2.64351e-06	0.742871	6.4164e-05	6
MAOC RZE 0-30 cm	Conventional-Regenerative Classification	0.678167	s(Longitude_mean,Latitude_mean)	Spatial (longitude x latitude)	smooth	NA	NA	2.06958	1.43481e-06	5.35705	24
MAOC RZE 0-30 cm	Conventional-Regenerative Classification	0.678167	s(silt_farm_mean_mean)	Silt (%)	smooth	NA	NA	0.941684	0.0191206	1.48233	6
MAOC RZE 0-30 cm	Conventional-Regenerative Classification	0.678167	s(Ca_sat_0_15cm_mean)	Ca saturation 0-15 cm	smooth	NA	NA	4.97992e-07	0.453932	5.28091e-06	6
MAOC RZE 30-60 cm	Grazing (Y/N)	0.197693	(Intercept)	Intercept	parametric	3.10044	0.406153	7.63367	1.75857e-09	NA	NA
MAOC RZE 30-60 cm	Grazing (Y/N)	0.197693	Grazing_Y_NNG	Effect of No Grazing (vs Grazing)	parametric	0.172666	0.597594	0.288935	0.774044	NA	NA
MAOC RZE 30-60 cm	Grazing (Y/N)	0.197693	s(clay_farm_mean_mean)	Clay (%)	smooth	NA	NA	0.783962	0.0338448	1.37572	6
MAOC RZE 30-60 cm	Grazing (Y/N)	0.197693	s(Longitude_mean,Latitude_mean)	Spatial (longitude x latitude)	smooth	NA	NA	0.197881	0.0231496	1.13244	24
MAOC RZE 30-60 cm	Grazing (Y/N)	0.197693	s(silt_farm_mean_mean)	Silt (%)	smooth	NA	NA	0.0463443	0.282819	0.233069	6
MAOC RZE 30-60 cm	Grazing (Y/N)	0.197693	s(Ca_sat_0_15cm_mean)	Ca saturation 0-15 cm	smooth	NA	NA	2.57503e-08	0.884959	1.68226e-06	6
MAOC RZE 30-60 cm	Conventional-Regenerative Classification	0.254553	(Intercept)	Intercept	parametric	2.68251	0.511269	5.24677	5.11461e-06	NA	NA
MAOC RZE 30-60 cm	Conventional-Regenerative Classification	0.254553	Score.Result_using_winter_cover_cropsRegenerative	Effect of management classification	parametric	0.458178	0.680153	0.67364	0.504338	NA	NA
MAOC RZE 30-60 cm	Conventional-Regenerative Classification	0.254553	Score.Result_using_winter_cover_cropsTransition	Effect of management classification	parametric	1.77784	0.922794	1.92658	0.0610162	NA	NA
MAOC RZE 30-60 cm	Conventional-Regenerative Classification	0.254553	s(clay_farm_mean_mean)	Clay (%)	smooth	NA	NA	0.525168	0.0619442	1.11933	6
MAOC RZE 30-60 cm	Conventional-Regenerative Classification	0.254553	s(Longitude_mean,Latitude_mean)	Spatial (longitude x latitude)	smooth	NA	NA	0.347306	0.00431873	1.3516	24
MAOC RZE 30-60 cm	Conventional-Regenerative Classification	0.254553	s(silt_farm_mean_mean)	Silt (%)	smooth	NA	NA	0.219236	0.15792	0.723238	6
MAOC RZE 30-60 cm	Conventional-Regenerative Classification	0.254553	s(Ca_sat_0_15cm_mean)	Ca saturation 0-15 cm	smooth	NA	NA	3.16829e-07	0.874936	1.79249e-05	6
MAOC RZE 0-60 cm	Grazing (Y/N)	0.772224	(Intercept)	Intercept	parametric	15.034	0.571301	26.3153	8.16342e-26	NA	NA
MAOC RZE 0-60 cm	Grazing (Y/N)	0.772224	Grazing_Y_NNG	Effect of No Grazing (vs Grazing)	parametric	-1.68625	0.850987	-1.98152	0.0548828	NA	NA
MAOC RZE 0-60 cm	Grazing (Y/N)	0.772224	s(clay_farm_mean_mean)	Clay (%)	smooth	NA	NA	6.00708e-05	0.355178	0.000419196	6
MAOC RZE 0-60 cm	Grazing (Y/N)	0.772224	s(Longitude_mean,Latitude_mean)	Spatial (longitude x latitude)	smooth	NA	NA	5.10431	0	6.25601	24
MAOC RZE 0-60 cm	Grazing (Y/N)	0.772224	s(silt_farm_mean_mean)	Silt (%)	smooth	NA	NA	0.472282	0.0749411	1.16054	6
MAOC RZE 0-60 cm	Grazing (Y/N)	0.772224	s(Ca_sat_0_15cm_mean)	Ca saturation 0-15 cm	smooth	NA	NA	3.67834e-06	0.482163	4.02273e-05	6
MAOC RZE 0-60 cm	Conventional-Regenerative Classification	0.762519	(Intercept)	Intercept	parametric	12.7154	0.777922	16.3454	1.1432e-18	NA	NA
MAOC RZE 0-60 cm	Conventional-Regenerative Classification	0.762519	Score.Result_using_winter_cover_cropsRegenerative	Effect of management classification	parametric	2.54876	1.04274	2.44429	0.0193204	NA	NA
MAOC RZE 0-60 cm	Conventional-Regenerative Classification	0.762519	Score.Result_using_winter_cover_cropsTransition	Effect of management classification	parametric	1.5291	1.45909	1.04798	0.301341	NA	NA
MAOC RZE 0-60 cm	Conventional-Regenerative Classification	0.762519	s(clay_farm_mean_mean)	Clay (%)	smooth	NA	NA	5.53353e-06	0.723512	0.000122549	6
MAOC RZE 0-60 cm	Conventional-Regenerative Classification	0.762519	s(Longitude_mean,Latitude_mean)	Spatial (longitude x latitude)	smooth	NA	NA	3.94982	0	5.54722	24
MAOC RZE 0-60 cm	Conventional-Regenerative Classification	0.762519	s(silt_farm_mean_mean)	Silt (%)	smooth	NA	NA	0.274364	0.1339	0.870422	6
MAOC RZE 0-60 cm	Conventional-Regenerative Classification	0.762519	s(Ca_sat_0_15cm_mean)	Ca saturation 0-15 cm	smooth	NA	NA	1.95074e-06	0.554695	2.49801e-05	6
POC baseline 0-15 cm	Grazing (Y/N)	0.635763	(Intercept)	Intercept	parametric	3.97241	0.264106	15.041	7.26911e-18	NA	NA
POC baseline 0-15 cm	Grazing (Y/N)	0.635763	Grazing_Y_NNG	Effect of No Grazing (vs Grazing)	parametric	-0.078788	0.390769	-0.201623	0.841255	NA	NA
POC baseline 0-15 cm	Grazing (Y/N)	0.635763	s(clay_farm_mean_mean)	Clay (%)	smooth	NA	NA	0.318453	0.0632965	0.656582	6
POC baseline 0-15 cm	Grazing (Y/N)	0.635763	s(Longitude_mean,Latitude_mean)	Spatial (longitude x latitude)	smooth	NA	NA	2.199	1.39265e-06	6.42494	24
POC baseline 0-15 cm	Grazing (Y/N)	0.635763	s(silt_farm_mean_mean)	Silt (%)	smooth	NA	NA	1.53885e-07	0.921926	1.29641e-05	6
POC baseline 0-15 cm	Grazing (Y/N)	0.635763	s(Ca_sat_0_15cm_mean)	Ca saturation 0-15 cm	smooth	NA	NA	0.496585	0.0445471	0.748716	6
POC baseline 0-15 cm	Conventional-Regenerative Classification	0.641993	(Intercept)	Intercept	parametric	4.43398	0.340601	13.0181	9.40906e-16	NA	NA
POC baseline 0-15 cm	Conventional-Regenerative Classification	0.641993	Score.Result_using_winter_cover_cropsRegenerative	Effect of management classification	parametric	-0.64131	0.470277	-1.36369	0.18051	NA	NA
POC baseline 0-15 cm	Conventional-Regenerative Classification	0.641993	Score.Result_using_winter_cover_cropsTransition	Effect of management classification	parametric	-1.29109	0.662637	-1.94842	0.058609	NA	NA
POC baseline 0-15 cm	Conventional-Regenerative Classification	0.641993	s(clay_farm_mean_mean)	Clay (%)	smooth	NA	NA	0.666587	0.0158863	0.800046	6
POC baseline 0-15 cm	Conventional-Regenerative Classification	0.641993	s(Longitude_mean,Latitude_mean)	Spatial (longitude x latitude)	smooth	NA	NA	1.56265	2.10631e-05	5.51792	24
POC baseline 0-15 cm	Conventional-Regenerative Classification	0.641993	s(silt_farm_mean_mean)	Silt (%)	smooth	NA	NA	3.42082e-08	0.975335	4.8187e-06	6
POC baseline 0-15 cm	Conventional-Regenerative Classification	0.641993	s(Ca_sat_0_15cm_mean)	Ca saturation 0-15 cm	smooth	NA	NA	0.673471	0.0263779	0.801621	6
POC baseline 15-30 cm	Grazing (Y/N)	0.635763	(Intercept)	Intercept	parametric	3.97241	0.264106	15.041	7.26911e-18	NA	NA
POC baseline 15-30 cm	Grazing (Y/N)	0.635763	Grazing_Y_NNG	Effect of No Grazing (vs Grazing)	parametric	-0.078788	0.390769	-0.201623	0.841255	NA	NA
POC baseline 15-30 cm	Grazing (Y/N)	0.635763	s(clay_farm_mean_mean)	Clay (%)	smooth	NA	NA	0.318453	0.0632965	0.656582	6
POC baseline 15-30 cm	Grazing (Y/N)	0.635763	s(Longitude_mean,Latitude_mean)	Spatial (longitude x latitude)	smooth	NA	NA	2.199	1.39265e-06	6.42494	24
POC baseline 15-30 cm	Grazing (Y/N)	0.635763	s(silt_farm_mean_mean)	Silt (%)	smooth	NA	NA	1.53885e-07	0.921926	1.29641e-05	6
POC baseline 15-30 cm	Grazing (Y/N)	0.635763	s(Ca_sat_0_15cm_mean)	Ca saturation 0-15 cm	smooth	NA	NA	0.496585	0.0445471	0.748716	6
POC baseline 15-30 cm	Conventional-Regenerative Classification	0.641993	(Intercept)	Intercept	parametric	4.43398	0.340601	13.0181	9.40906e-16	NA	NA
POC baseline 15-30 cm	Conventional-Regenerative Classification	0.641993	Score.Result_using_winter_cover_cropsRegenerative	Effect of management classification	parametric	-0.64131	0.470277	-1.36369	0.18051	NA	NA
POC baseline 15-30 cm	Conventional-Regenerative Classification	0.641993	Score.Result_using_winter_cover_cropsTransition	Effect of management classification	parametric	-1.29109	0.662637	-1.94842	0.058609	NA	NA
POC baseline 15-30 cm	Conventional-Regenerative Classification	0.641993	s(clay_farm_mean_mean)	Clay (%)	smooth	NA	NA	0.666587	0.0158863	0.800046	6
POC baseline 15-30 cm	Conventional-Regenerative Classification	0.641993	s(Longitude_mean,Latitude_mean)	Spatial (longitude x latitude)	smooth	NA	NA	1.56265	2.10631e-05	5.51792	24
POC baseline 15-30 cm	Conventional-Regenerative Classification	0.641993	s(silt_farm_mean_mean)	Silt (%)	smooth	NA	NA	3.42082e-08	0.975335	4.8187e-06	6
POC baseline 15-30 cm	Conventional-Regenerative Classification	0.641993	s(Ca_sat_0_15cm_mean)	Ca saturation 0-15 cm	smooth	NA	NA	0.673471	0.0263779	0.801621	6
POC baseline 0-30 cm	Grazing (Y/N)	0.635763	(Intercept)	Intercept	parametric	7.94481	0.528211	15.041	7.26904e-18	NA	NA
POC baseline 0-30 cm	Grazing (Y/N)	0.635763	Grazing_Y_NNG	Effect of No Grazing (vs Grazing)	parametric	-0.157576	0.781537	-0.201623	0.841255	NA	NA
POC baseline 0-30 cm	Grazing (Y/N)	0.635763	s(clay_farm_mean_mean)	Clay (%)	smooth	NA	NA	0.318453	0.0632965	0.656582	6
POC baseline 0-30 cm	Grazing (Y/N)	0.635763	s(Longitude_mean,Latitude_mean)	Spatial (longitude x latitude)	smooth	NA	NA	2.199	1.39266e-06	6.42494	24
POC baseline 0-30 cm	Grazing (Y/N)	0.635763	s(silt_farm_mean_mean)	Silt (%)	smooth	NA	NA	5.66119e-08	0.921925	4.7692e-06	6
POC baseline 0-30 cm	Grazing (Y/N)	0.635763	s(Ca_sat_0_15cm_mean)	Ca saturation 0-15 cm	smooth	NA	NA	0.496585	0.044547	0.748713	6
POC baseline 0-30 cm	Conventional-Regenerative Classification	0.641992	(Intercept)	Intercept	parametric	8.86796	0.681204	13.0181	9.41047e-16	NA	NA
POC baseline 0-30 cm	Conventional-Regenerative Classification	0.641992	Score.Result_using_winter_cover_cropsRegenerative	Effect of management classification	parametric	-1.28262	0.940558	-1.36368	0.180512	NA	NA
POC baseline 0-30 cm	Conventional-Regenerative Classification	0.641992	Score.Result_using_winter_cover_cropsTransition	Effect of management classification	parametric	-2.58219	1.32528	-1.94841	0.0586097	NA	NA
POC baseline 0-30 cm	Conventional-Regenerative Classification	0.641992	s(clay_farm_mean_mean)	Clay (%)	smooth	NA	NA	0.666597	0.0158875	0.80016	6
POC baseline 0-30 cm	Conventional-Regenerative Classification	0.641992	s(Longitude_mean,Latitude_mean)	Spatial (longitude x latitude)	smooth	NA	NA	1.56262	2.10638e-05	5.51791	24
POC baseline 0-30 cm	Conventional-Regenerative Classification	0.641992	s(silt_farm_mean_mean)	Silt (%)	smooth	NA	NA	9.29859e-08	0.975336	1.30986e-05	6
POC baseline 0-30 cm	Conventional-Regenerative Classification	0.641992	s(Ca_sat_0_15cm_mean)	Ca saturation 0-15 cm	smooth	NA	NA	0.673467	0.026378	0.801621	6
POC baseline 0-60 cm	Grazing (Y/N)	0.547347	(Intercept)	Intercept	parametric	12.4641	0.918359	13.5722	1.2571e-16	NA	NA
POC baseline 0-60 cm	Grazing (Y/N)	0.547347	Grazing_Y_NNG	Effect of No Grazing (vs Grazing)	parametric	-0.150464	1.35229	-0.111266	0.911957	NA	NA
POC baseline 0-60 cm	Grazing (Y/N)	0.547347	s(clay_farm_mean_mean)	Clay (%)	smooth	NA	NA	0.559928	0.0247451	0.770744	6
POC baseline 0-60 cm	Grazing (Y/N)	0.547347	s(Longitude_mean,Latitude_mean)	Spatial (longitude x latitude)	smooth	NA	NA	1.38946	4.19437e-05	5.22509	24
POC baseline 0-60 cm	Grazing (Y/N)	0.547347	s(silt_farm_mean_mean)	Silt (%)	smooth	NA	NA	1.78679e-07	0.779046	6.19727e-06	6
POC baseline 0-60 cm	Grazing (Y/N)	0.547347	s(Ca_sat_0_15cm_mean)	Ca saturation 0-15 cm	smooth	NA	NA	0.331482	0.0833811	0.665433	6
POC baseline 0-60 cm	Conventional-Regenerative Classification	0.567266	(Intercept)	Intercept	parametric	14.2131	1.15333	12.3236	3.39368e-15	NA	NA
POC baseline 0-60 cm	Conventional-Regenerative Classification	0.567266	Score.Result_using_winter_cover_cropsRegenerative	Effect of management classification	parametric	-2.30931	1.58342	-1.45843	0.152534	NA	NA
POC baseline 0-60 cm	Conventional-Regenerative Classification	0.567266	Score.Result_using_winter_cover_cropsTransition	Effect of management classification	parametric	-4.81957	2.23146	-2.15983	0.036838	NA	NA
POC baseline 0-60 cm	Conventional-Regenerative Classification	0.567266	s(clay_farm_mean_mean)	Clay (%)	smooth	NA	NA	1.00329	0.00516497	0.857697	6
POC baseline 0-60 cm	Conventional-Regenerative Classification	0.567266	s(Longitude_mean,Latitude_mean)	Spatial (longitude x latitude)	smooth	NA	NA	0.993967	0.000342095	4.43733	24
POC baseline 0-60 cm	Conventional-Regenerative Classification	0.567266	s(silt_farm_mean_mean)	Silt (%)	smooth	NA	NA	4.04483e-07	0.575774	6.55614e-06	6
POC baseline 0-60 cm	Conventional-Regenerative Classification	0.567266	s(Ca_sat_0_15cm_mean)	Ca saturation 0-15 cm	smooth	NA	NA	0.437862	0.0584624	0.72431	6
POC baseline 30-60 cm	Grazing (Y/N)	0.547347	(Intercept)	Intercept	parametric	6.23206	0.459179	13.5722	1.2571e-16	NA	NA
POC baseline 30-60 cm	Grazing (Y/N)	0.547347	Grazing_Y_NNG	Effect of No Grazing (vs Grazing)	parametric	-0.0752316	0.676145	-0.111265	0.911958	NA	NA
POC baseline 30-60 cm	Grazing (Y/N)	0.547347	s(clay_farm_mean_mean)	Clay (%)	smooth	NA	NA	0.559928	0.0247451	0.770744	6
POC baseline 30-60 cm	Grazing (Y/N)	0.547347	s(Longitude_mean,Latitude_mean)	Spatial (longitude x latitude)	smooth	NA	NA	1.38946	4.19438e-05	5.22509	24
POC baseline 30-60 cm	Grazing (Y/N)	0.547347	s(silt_farm_mean_mean)	Silt (%)	smooth	NA	NA	1.78679e-07	0.779046	6.19731e-06	6
POC baseline 30-60 cm	Grazing (Y/N)	0.547347	s(Ca_sat_0_15cm_mean)	Ca saturation 0-15 cm	smooth	NA	NA	0.331482	0.0833809	0.665429	6
POC baseline 30-60 cm	Conventional-Regenerative Classification	0.567267	(Intercept)	Intercept	parametric	7.10654	0.576661	12.3236	3.39322e-15	NA	NA
POC baseline 30-60 cm	Conventional-Regenerative Classification	0.567267	Score.Result_using_winter_cover_cropsRegenerative	Effect of management classification	parametric	-1.15465	0.791708	-1.45843	0.152533	NA	NA
POC baseline 30-60 cm	Conventional-Regenerative Classification	0.567267	Score.Result_using_winter_cover_cropsTransition	Effect of management classification	parametric	-2.40978	1.11572	-2.15983	0.0368379	NA	NA
POC baseline 30-60 cm	Conventional-Regenerative Classification	0.567267	s(clay_farm_mean_mean)	Clay (%)	smooth	NA	NA	1.00329	0.00516457	0.8576	6
POC baseline 30-60 cm	Conventional-Regenerative Classification	0.567267	s(Longitude_mean,Latitude_mean)	Spatial (longitude x latitude)	smooth	NA	NA	0.993983	0.000342083	4.43734	24
POC baseline 30-60 cm	Conventional-Regenerative Classification	0.567267	s(silt_farm_mean_mean)	Silt (%)	smooth	NA	NA	1.48801e-07	0.575774	2.41187e-06	6
POC baseline 30-60 cm	Conventional-Regenerative Classification	0.567267	s(Ca_sat_0_15cm_mean)	Ca saturation 0-15 cm	smooth	NA	NA	0.437866	0.0584616	0.724306	6
POC stock 0-15 cm	Grazing (Y/N)	0.665316	(Intercept)	Intercept	parametric	12.7622	0.575233	22.1862	8.91348e-24	NA	NA
POC stock 0-15 cm	Grazing (Y/N)	0.665316	Grazing_Y_NNG	Effect of No Grazing (vs Grazing)	parametric	-2.63569	0.852039	-3.09339	0.00364231	NA	NA
POC stock 0-15 cm	Grazing (Y/N)	0.665316	s(clay_farm_mean_mean)	Clay (%)	smooth	NA	NA	1.79907	0.000630943	1.35125	6
POC stock 0-15 cm	Grazing (Y/N)	0.665316	s(Longitude_mean,Latitude_mean)	Spatial (longitude x latitude)	smooth	NA	NA	1.4933	1.12376e-05	4.9247	24
POC stock 0-15 cm	Grazing (Y/N)	0.665316	s(silt_farm_mean_mean)	Silt (%)	smooth	NA	NA	1.33818e-06	0.793806	6.54138e-05	6
POC stock 0-15 cm	Grazing (Y/N)	0.665316	s(Ca_sat_0_15cm_mean)	Ca saturation 0-15 cm	smooth	NA	NA	0.918905	0.0277382	1.58343	6
POC stock 0-15 cm	Conventional-Regenerative Classification	0.65053	(Intercept)	Intercept	parametric	10.5034	0.752407	13.9597	5.76348e-17	NA	NA
POC stock 0-15 cm	Conventional-Regenerative Classification	0.65053	Score.Result_using_winter_cover_cropsRegenerative	Effect of management classification	parametric	2.62789	1.03287	2.54425	0.0149166	NA	NA
POC stock 0-15 cm	Conventional-Regenerative Classification	0.65053	Score.Result_using_winter_cover_cropsTransition	Effect of management classification	parametric	-1.85798	1.45145	-1.28009	0.207888	NA	NA
POC stock 0-15 cm	Conventional-Regenerative Classification	0.65053	s(clay_farm_mean_mean)	Clay (%)	smooth	NA	NA	2.02278	0.000339757	1.2861	6
POC stock 0-15 cm	Conventional-Regenerative Classification	0.65053	s(Longitude_mean,Latitude_mean)	Spatial (longitude x latitude)	smooth	NA	NA	0.798811	0.000881858	3.95924	24
POC stock 0-15 cm	Conventional-Regenerative Classification	0.65053	s(silt_farm_mean_mean)	Silt (%)	smooth	NA	NA	6.27118e-06	0.677294	0.000113223	6
POC stock 0-15 cm	Conventional-Regenerative Classification	0.65053	s(Ca_sat_0_15cm_mean)	Ca saturation 0-15 cm	smooth	NA	NA	0.505621	0.0457418	0.752106	6
POC stock 15-30 cm	Grazing (Y/N)	0.631784	(Intercept)	Intercept	parametric	5.07366	0.3153	16.0915	6.35045e-19	NA	NA
POC stock 15-30 cm	Grazing (Y/N)	0.631784	Grazing_Y_NNG	Effect of No Grazing (vs Grazing)	parametric	-0.341044	0.465997	-0.731859	0.468582	NA	NA
POC stock 15-30 cm	Grazing (Y/N)	0.631784	s(clay_farm_mean_mean)	Clay (%)	smooth	NA	NA	0.416013	0.0424359	0.714147	6
POC stock 15-30 cm	Grazing (Y/N)	0.631784	s(Longitude_mean,Latitude_mean)	Spatial (longitude x latitude)	smooth	NA	NA	2.03414	2.52876e-06	6.13143	24
POC stock 15-30 cm	Grazing (Y/N)	0.631784	s(silt_farm_mean_mean)	Silt (%)	smooth	NA	NA	1.46366e-07	0.888624	9.229e-06	6
POC stock 15-30 cm	Grazing (Y/N)	0.631784	s(Ca_sat_0_15cm_mean)	Ca saturation 0-15 cm	smooth	NA	NA	0.440783	0.0542109	0.725633	6
POC stock 15-30 cm	Conventional-Regenerative Classification	0.628336	(Intercept)	Intercept	parametric	5.27133	0.412244	12.7869	1.60486e-15	NA	NA
POC stock 15-30 cm	Conventional-Regenerative Classification	0.628336	Score.Result_using_winter_cover_cropsRegenerative	Effect of management classification	parametric	-0.355457	0.569338	-0.624333	0.536048	NA	NA
POC stock 15-30 cm	Conventional-Regenerative Classification	0.628336	Score.Result_using_winter_cover_cropsTransition	Effect of management classification	parametric	-1.28554	0.800464	-1.60599	0.116351	NA	NA
POC stock 15-30 cm	Conventional-Regenerative Classification	0.628336	s(clay_farm_mean_mean)	Clay (%)	smooth	NA	NA	0.629697	0.0180756	0.790806	6
POC stock 15-30 cm	Conventional-Regenerative Classification	0.628336	s(Longitude_mean,Latitude_mean)	Spatial (longitude x latitude)	smooth	NA	NA	1.49028	3.18274e-05	5.47698	24
POC stock 15-30 cm	Conventional-Regenerative Classification	0.628336	s(silt_farm_mean_mean)	Silt (%)	smooth	NA	NA	1.1156e-07	0.939053	9.36278e-06	6
POC stock 15-30 cm	Conventional-Regenerative Classification	0.628336	s(Ca_sat_0_15cm_mean)	Ca saturation 0-15 cm	smooth	NA	NA	0.567164	0.0366743	0.77289	6
POC stock 0-30 cm	Grazing (Y/N)	0.722926	(Intercept)	Intercept	parametric	17.8048	0.748169	23.7978	1.4689e-24	NA	NA
POC stock 0-30 cm	Grazing (Y/N)	0.722926	Grazing_Y_NNG	Effect of No Grazing (vs Grazing)	parametric	-2.91042	1.11151	-2.61845	0.012583	NA	NA
POC stock 0-30 cm	Grazing (Y/N)	0.722926	s(clay_farm_mean_mean)	Clay (%)	smooth	NA	NA	1.68487	0.000930731	1.37949	6
POC stock 0-30 cm	Grazing (Y/N)	0.722926	s(Longitude_mean,Latitude_mean)	Spatial (longitude x latitude)	smooth	NA	NA	2.19369	6.78163e-07	5.83869	24
POC stock 0-30 cm	Grazing (Y/N)	0.722926	s(silt_farm_mean_mean)	Silt (%)	smooth	NA	NA	4.8019e-07	0.928411	0.00011486	6
POC stock 0-30 cm	Grazing (Y/N)	0.722926	s(Ca_sat_0_15cm_mean)	Ca saturation 0-15 cm	smooth	NA	NA	1.07482	0.0140956	1.46507	6
POC stock 0-30 cm	Conventional-Regenerative Classification	0.708844	(Intercept)	Intercept	parametric	15.7735	0.994707	15.8574	1.48391e-18	NA	NA
POC stock 0-30 cm	Conventional-Regenerative Classification	0.708844	Score.Result_using_winter_cover_cropsRegenerative	Effect of management classification	parametric	2.22406	1.37313	1.6197	0.11339	NA	NA
POC stock 0-30 cm	Conventional-Regenerative Classification	0.708844	Score.Result_using_winter_cover_cropsTransition	Effect of management classification	parametric	-2.96923	1.9319	-1.53695	0.132415	NA	NA
POC stock 0-30 cm	Conventional-Regenerative Classification	0.708844	s(clay_farm_mean_mean)	Clay (%)	smooth	NA	NA	1.73039	0.000602102	1.13088	6
POC stock 0-30 cm	Conventional-Regenerative Classification	0.708844	s(Longitude_mean,Latitude_mean)	Spatial (longitude x latitude)	smooth	NA	NA	1.42435	3.37775e-05	5.20256	24
POC stock 0-30 cm	Conventional-Regenerative Classification	0.708844	s(silt_farm_mean_mean)	Silt (%)	smooth	NA	NA	1.74956e-06	0.795846	5.11094e-05	6
POC stock 0-30 cm	Conventional-Regenerative Classification	0.708844	s(Ca_sat_0_15cm_mean)	Ca saturation 0-15 cm	smooth	NA	NA	0.837981	0.0158395	0.834237	6
POC stock 30-60 cm	Grazing (Y/N)	0.653763	(Intercept)	Intercept	parametric	6.77931	0.431945	15.6948	1.87022e-18	NA	NA
POC stock 30-60 cm	Grazing (Y/N)	0.653763	Grazing_Y_NNG	Effect of No Grazing (vs Grazing)	parametric	-0.0178151	0.639038	-0.027878	0.977901	NA	NA
POC stock 30-60 cm	Grazing (Y/N)	0.653763	s(clay_farm_mean_mean)	Clay (%)	smooth	NA	NA	0.393598	0.0473392	0.702667	6
POC stock 30-60 cm	Grazing (Y/N)	0.653763	s(Longitude_mean,Latitude_mean)	Spatial (longitude x latitude)	smooth	NA	NA	2.30801	9.16201e-07	6.46425	24
POC stock 30-60 cm	Grazing (Y/N)	0.653763	s(silt_farm_mean_mean)	Silt (%)	smooth	NA	NA	6.29804e-08	0.889026	3.87788e-06	6
POC stock 30-60 cm	Grazing (Y/N)	0.653763	s(Ca_sat_0_15cm_mean)	Ca saturation 0-15 cm	smooth	NA	NA	0.661853	0.0269812	0.798839	6
POC stock 30-60 cm	Conventional-Regenerative Classification	0.671779	(Intercept)	Intercept	parametric	7.72325	0.547705	14.1011	7.57731e-17	NA	NA
POC stock 30-60 cm	Conventional-Regenerative Classification	0.671779	Score.Result_using_winter_cover_cropsRegenerative	Effect of management classification	parametric	-1.22727	0.756346	-1.62263	0.112774	NA	NA
POC stock 30-60 cm	Conventional-Regenerative Classification	0.671779	Score.Result_using_winter_cover_cropsTransition	Effect of management classification	parametric	-2.45835	1.06667	-2.30469	0.0266281	NA	NA
POC stock 30-60 cm	Conventional-Regenerative Classification	0.671779	s(clay_farm_mean_mean)	Clay (%)	smooth	NA	NA	0.856346	0.00807967	0.837162	6
POC stock 30-60 cm	Conventional-Regenerative Classification	0.671779	s(Longitude_mean,Latitude_mean)	Spatial (longitude x latitude)	smooth	NA	NA	1.68342	1.09933e-05	5.56595	24
POC stock 30-60 cm	Conventional-Regenerative Classification	0.671779	s(silt_farm_mean_mean)	Silt (%)	smooth	NA	NA	2.78993e-07	0.616878	5.83577e-06	6
POC stock 30-60 cm	Conventional-Regenerative Classification	0.671779	s(Ca_sat_0_15cm_mean)	Ca saturation 0-15 cm	smooth	NA	NA	0.82739	0.0165063	0.832342	6
POC stock 0-60 cm	Grazing (Y/N)	0.730436	(Intercept)	Intercept	parametric	24.4986	1.0656	22.9904	3.06935e-24	NA	NA
POC stock 0-60 cm	Grazing (Y/N)	0.730436	Grazing_Y_NNG	Effect of No Grazing (vs Grazing)	parametric	-2.74615	1.57724	-1.74111	0.0895726	NA	NA
POC stock 0-60 cm	Grazing (Y/N)	0.730436	s(clay_farm_mean_mean)	Clay (%)	smooth	NA	NA	1.42639	0.00156104	1.09463	6
POC stock 0-60 cm	Grazing (Y/N)	0.730436	s(Longitude_mean,Latitude_mean)	Spatial (longitude x latitude)	smooth	NA	NA	2.54334	2.83181e-07	6.17654	24
POC stock 0-60 cm	Grazing (Y/N)	0.730436	s(silt_farm_mean_mean)	Silt (%)	smooth	NA	NA	3.56455e-07	0.964514	4.56818e-05	6
POC stock 0-60 cm	Grazing (Y/N)	0.730436	s(Ca_sat_0_15cm_mean)	Ca saturation 0-15 cm	smooth	NA	NA	0.928636	0.0117058	0.848786	6
POC stock 0-60 cm	Conventional-Regenerative Classification	0.734694	(Intercept)	Intercept	parametric	23.5025	1.37944	17.0377	1.54143e-19	NA	NA
POC stock 0-60 cm	Conventional-Regenerative Classification	0.734694	Score.Result_using_winter_cover_cropsRegenerative	Effect of management classification	parametric	0.968666	1.90643	0.508105	0.614275	NA	NA
POC stock 0-60 cm	Conventional-Regenerative Classification	0.734694	Score.Result_using_winter_cover_cropsTransition	Effect of management classification	parametric	-5.37171	2.68827	-1.99821	0.0527839	NA	NA
POC stock 0-60 cm	Conventional-Regenerative Classification	0.734694	s(clay_farm_mean_mean)	Clay (%)	smooth	NA	NA	1.57958	0.00077347	0.904988	6
POC stock 0-60 cm	Conventional-Regenerative Classification	0.734694	s(Longitude_mean,Latitude_mean)	Spatial (longitude x latitude)	smooth	NA	NA	1.8574	4.82127e-06	5.67869	24
POC stock 0-60 cm	Conventional-Regenerative Classification	0.734694	s(silt_farm_mean_mean)	Silt (%)	smooth	NA	NA	2.24934e-07	0.978592	3.44956e-05	6
POC stock 0-60 cm	Conventional-Regenerative Classification	0.734694	s(Ca_sat_0_15cm_mean)	Ca saturation 0-15 cm	smooth	NA	NA	1.08847	0.00759709	0.867227	6
POC RZE 0-15 cm	Grazing (Y/N)	0.429056	(Intercept)	Intercept	parametric	8.82737	0.584244	15.109	1.29722e-18	NA	NA
POC RZE 0-15 cm	Grazing (Y/N)	0.429056	Grazing_Y_NNG	Effect of No Grazing (vs Grazing)	parametric	-2.63691	0.857223	-3.07611	0.0036762	NA	NA
POC RZE 0-15 cm	Grazing (Y/N)	0.429056	s(clay_farm_mean_mean)	Clay (%)	smooth	NA	NA	0.823027	0.0110513	0.831608	6
POC RZE 0-15 cm	Grazing (Y/N)	0.429056	s(Longitude_mean,Latitude_mean)	Spatial (longitude x latitude)	smooth	NA	NA	0.48212	0.00364787	2.67957	24
POC RZE 0-15 cm	Grazing (Y/N)	0.429056	s(silt_farm_mean_mean)	Silt (%)	smooth	NA	NA	3.02327e-06	0.830513	0.000121121	6
POC RZE 0-15 cm	Grazing (Y/N)	0.429056	s(Ca_sat_0_15cm_mean)	Ca saturation 0-15 cm	smooth	NA	NA	0.499048	0.0999578	1.35697	6
POC RZE 0-15 cm	Conventional-Regenerative Classification	0.451322	(Intercept)	Intercept	parametric	5.92503	0.693037	8.54937	6.50441e-11	NA	NA
POC RZE 0-15 cm	Conventional-Regenerative Classification	0.451322	Score.Result_using_winter_cover_cropsRegenerative	Effect of management classification	parametric	3.60845	0.93061	3.87752	0.000347349	NA	NA
POC RZE 0-15 cm	Conventional-Regenerative Classification	0.451322	Score.Result_using_winter_cover_cropsTransition	Effect of management classification	parametric	-0.719597	1.31565	-0.54695	0.587169	NA	NA
POC RZE 0-15 cm	Conventional-Regenerative Classification	0.451322	s(clay_farm_mean_mean)	Clay (%)	smooth	NA	NA	1.19518	0.00629339	0.877621	6
POC RZE 0-15 cm	Conventional-Regenerative Classification	0.451322	s(Longitude_mean,Latitude_mean)	Spatial (longitude x latitude)	smooth	NA	NA	0.155122	0.039026	1.0005	24
POC RZE 0-15 cm	Conventional-Regenerative Classification	0.451322	s(silt_farm_mean_mean)	Silt (%)	smooth	NA	NA	1.30634e-07	0.832082	5.52788e-06	6
POC RZE 0-15 cm	Conventional-Regenerative Classification	0.451322	s(Ca_sat_0_15cm_mean)	Ca saturation 0-15 cm	smooth	NA	NA	1.75088e-06	0.460606	1.56563e-05	6
POC RZE 15-30 cm	Grazing (Y/N)	0.335569	(Intercept)	Intercept	parametric	1.10329	0.0967172	11.4073	1.24176e-14	NA	NA
POC RZE 15-30 cm	Grazing (Y/N)	0.335569	Grazing_Y_NNG	Effect of No Grazing (vs Grazing)	parametric	-0.26659	0.141489	-1.88417	0.0662673	NA	NA
POC RZE 15-30 cm	Grazing (Y/N)	0.335569	s(clay_farm_mean_mean)	Clay (%)	smooth	NA	NA	0.335916	0.0660061	0.668426	6
POC RZE 15-30 cm	Grazing (Y/N)	0.335569	s(Longitude_mean,Latitude_mean)	Spatial (longitude x latitude)	smooth	NA	NA	0.539134	0.00378497	3.03534	24
POC RZE 15-30 cm	Grazing (Y/N)	0.335569	s(silt_farm_mean_mean)	Silt (%)	smooth	NA	NA	4.46054e-07	0.48182	4.3259e-06	6
POC RZE 15-30 cm	Grazing (Y/N)	0.335569	s(Ca_sat_0_15cm_mean)	Ca saturation 0-15 cm	smooth	NA	NA	9.61738e-07	0.427785	9.37135e-06	6
POC RZE 15-30 cm	Conventional-Regenerative Classification	0.314383	(Intercept)	Intercept	parametric	0.851967	0.122157	6.97438	1.44343e-08	NA	NA
POC RZE 15-30 cm	Conventional-Regenerative Classification	0.314383	Score.Result_using_winter_cover_cropsRegenerative	Effect of management classification	parametric	0.276845	0.165626	1.6715	0.101927	NA	NA
POC RZE 15-30 cm	Conventional-Regenerative Classification	0.314383	Score.Result_using_winter_cover_cropsTransition	Effect of management classification	parametric	-0.0658915	0.233672	-0.281983	0.779317	NA	NA
POC RZE 15-30 cm	Conventional-Regenerative Classification	0.314383	s(clay_farm_mean_mean)	Clay (%)	smooth	NA	NA	0.464563	0.0436903	0.736013	6
POC RZE 15-30 cm	Conventional-Regenerative Classification	0.314383	s(Longitude_mean,Latitude_mean)	Spatial (longitude x latitude)	smooth	NA	NA	0.381195	0.0121745	2.51055	24
POC RZE 15-30 cm	Conventional-Regenerative Classification	0.314383	s(silt_farm_mean_mean)	Silt (%)	smooth	NA	NA	2.83584e-07	0.473893	2.72769e-06	6
POC RZE 15-30 cm	Conventional-Regenerative Classification	0.314383	s(Ca_sat_0_15cm_mean)	Ca saturation 0-15 cm	smooth	NA	NA	1.65876e-07	0.570265	2.60896e-06	6
POC RZE 0-30 cm	Grazing (Y/N)	0.466935	(Intercept)	Intercept	parametric	9.92831	0.620964	15.9885	2.09171e-19	NA	NA
POC RZE 0-30 cm	Grazing (Y/N)	0.466935	Grazing_Y_NNG	Effect of No Grazing (vs Grazing)	parametric	-2.89849	0.911895	-3.17854	0.00278662	NA	NA
POC RZE 0-30 cm	Grazing (Y/N)	0.466935	s(clay_farm_mean_mean)	Clay (%)	smooth	NA	NA	0.863202	0.00936299	0.838194	6
POC RZE 0-30 cm	Grazing (Y/N)	0.466935	s(Longitude_mean,Latitude_mean)	Spatial (longitude x latitude)	smooth	NA	NA	0.582374	0.0018149	2.95828	24
POC RZE 0-30 cm	Grazing (Y/N)	0.466935	s(silt_farm_mean_mean)	Silt (%)	smooth	NA	NA	3.15611e-06	0.707929	6.77782e-05	6
POC RZE 0-30 cm	Grazing (Y/N)	0.466935	s(Ca_sat_0_15cm_mean)	Ca saturation 0-15 cm	smooth	NA	NA	0.564403	0.0868254	1.45155	6
POC RZE 0-30 cm	Conventional-Regenerative Classification	0.471138	(Intercept)	Intercept	parametric	6.78166	0.749145	9.05253	1.31051e-11	NA	NA
POC RZE 0-30 cm	Conventional-Regenerative Classification	0.471138	Score.Result_using_winter_cover_cropsRegenerative	Effect of management classification	parametric	3.87507	1.00756	3.84599	0.000383436	NA	NA
POC RZE 0-30 cm	Conventional-Regenerative Classification	0.471138	Score.Result_using_winter_cover_cropsTransition	Effect of management classification	parametric	-0.78304	1.42154	-0.550839	0.58453	NA	NA
POC RZE 0-30 cm	Conventional-Regenerative Classification	0.471138	s(clay_farm_mean_mean)	Clay (%)	smooth	NA	NA	1.37767	0.00381956	0.89208	6
POC RZE 0-30 cm	Conventional-Regenerative Classification	0.471138	s(Longitude_mean,Latitude_mean)	Spatial (longitude x latitude)	smooth	NA	NA	0.202224	0.0230072	1.10318	24
POC RZE 0-30 cm	Conventional-Regenerative Classification	0.471138	s(silt_farm_mean_mean)	Silt (%)	smooth	NA	NA	2.15411e-07	0.714112	4.90224e-06	6
POC RZE 0-30 cm	Conventional-Regenerative Classification	0.471138	s(Ca_sat_0_15cm_mean)	Ca saturation 0-15 cm	smooth	NA	NA	1.21658e-05	0.362966	8.78099e-05	6
POC RZE 30-60 cm	Grazing (Y/N)	0.0264278	(Intercept)	Intercept	parametric	0.550894	0.200536	2.7471	0.00856735	NA	NA
POC RZE 30-60 cm	Grazing (Y/N)	0.0264278	Grazing_Y_NNG	Effect of No Grazing (vs Grazing)	parametric	0.049646	0.293233	0.169305	0.866302	NA	NA
POC RZE 30-60 cm	Grazing (Y/N)	0.0264278	s(clay_farm_mean_mean)	Clay (%)	smooth	NA	NA	0.2611	0.13896	0.784104	6
POC RZE 30-60 cm	Grazing (Y/N)	0.0264278	s(Longitude_mean,Latitude_mean)	Spatial (longitude x latitude)	smooth	NA	NA	0.0239543	0.232644	0.409379	24
POC RZE 30-60 cm	Grazing (Y/N)	0.0264278	s(silt_farm_mean_mean)	Silt (%)	smooth	NA	NA	3.15592e-06	0.505547	3.36244e-05	6
POC RZE 30-60 cm	Grazing (Y/N)	0.0264278	s(Ca_sat_0_15cm_mean)	Ca saturation 0-15 cm	smooth	NA	NA	1.39926e-06	0.682215	2.64243e-05	6
POC RZE 30-60 cm	Conventional-Regenerative Classification	0.0187882	(Intercept)	Intercept	parametric	0.73488	0.246585	2.98022	0.00463536	NA	NA
POC RZE 30-60 cm	Conventional-Regenerative Classification	0.0187882	Score.Result_using_winter_cover_cropsRegenerative	Effect of management classification	parametric	-0.225169	0.330759	-0.680765	0.499513	NA	NA
POC RZE 30-60 cm	Conventional-Regenerative Classification	0.0187882	Score.Result_using_winter_cover_cropsTransition	Effect of management classification	parametric	-0.35277	0.462703	-0.762411	0.449798	NA	NA
POC RZE 30-60 cm	Conventional-Regenerative Classification	0.0187882	s(clay_farm_mean_mean)	Clay (%)	smooth	NA	NA	0.305772	0.116502	0.830335	6
POC RZE 30-60 cm	Conventional-Regenerative Classification	0.0187882	s(Longitude_mean,Latitude_mean)	Spatial (longitude x latitude)	smooth	NA	NA	0.0118661	0.272795	0.234767	24
POC RZE 30-60 cm	Conventional-Regenerative Classification	0.0187882	s(silt_farm_mean_mean)	Silt (%)	smooth	NA	NA	2.3874e-06	0.599416	3.43457e-05	6
POC RZE 30-60 cm	Conventional-Regenerative Classification	0.0187882	s(Ca_sat_0_15cm_mean)	Ca saturation 0-15 cm	smooth	NA	NA	3.09907e-06	0.572659	3.7535e-05	6
POC RZE 0-60 cm	Grazing (Y/N)	0.505663	(Intercept)	Intercept	parametric	10.4446	0.620044	16.8449	3.65983e-20	NA	NA
POC RZE 0-60 cm	Grazing (Y/N)	0.505663	Grazing_Y_NNG	Effect of No Grazing (vs Grazing)	parametric	-2.77515	0.910777	-3.04702	0.00400829	NA	NA
POC RZE 0-60 cm	Grazing (Y/N)	0.505663	s(clay_farm_mean_mean)	Clay (%)	smooth	NA	NA	1.02003	0.0053452	0.859578	6
POC RZE 0-60 cm	Grazing (Y/N)	0.505663	s(Longitude_mean,Latitude_mean)	Spatial (longitude x latitude)	smooth	NA	NA	0.720391	0.00077679	3.33882	24
POC RZE 0-60 cm	Grazing (Y/N)	0.505663	s(silt_farm_mean_mean)	Silt (%)	smooth	NA	NA	2.62947e-05	0.439961	0.000224216	6
POC RZE 0-60 cm	Grazing (Y/N)	0.505663	s(Ca_sat_0_15cm_mean)	Ca saturation 0-15 cm	smooth	NA	NA	0.448753	0.114505	1.29773	6
POC RZE 0-60 cm	Conventional-Regenerative Classification	0.49508	(Intercept)	Intercept	parametric	7.4957	0.760843	9.85184	1.09872e-12	NA	NA
POC RZE 0-60 cm	Conventional-Regenerative Classification	0.49508	Score.Result_using_winter_cover_cropsRegenerative	Effect of management classification	parametric	3.65565	1.02564	3.56427	0.000895374	NA	NA
POC RZE 0-60 cm	Conventional-Regenerative Classification	0.49508	Score.Result_using_winter_cover_cropsTransition	Effect of management classification	parametric	-1.00965	1.4423	-0.700024	0.487611	NA	NA
POC RZE 0-60 cm	Conventional-Regenerative Classification	0.49508	s(clay_farm_mean_mean)	Clay (%)	smooth	NA	NA	1.82862	0.00117741	0.916488	6
POC RZE 0-60 cm	Conventional-Regenerative Classification	0.49508	s(Longitude_mean,Latitude_mean)	Spatial (longitude x latitude)	smooth	NA	NA	0.276723	0.0108473	1.24165	24
POC RZE 0-60 cm	Conventional-Regenerative Classification	0.49508	s(silt_farm_mean_mean)	Silt (%)	smooth	NA	NA	3.34687e-05	0.38418	0.000230068	6
POC RZE 0-60 cm	Conventional-Regenerative Classification	0.49508	s(Ca_sat_0_15cm_mean)	Ca saturation 0-15 cm	smooth	NA	NA	2.70569e-05	0.360643	0.000191637	6
MAN baseline 0-15 cm	Grazing (Y/N)	0.794632	(Intercept)	Intercept	parametric	1.43601	0.0444818	32.283	4.26854e-27	NA	NA
MAN baseline 0-15 cm	Grazing (Y/N)	0.794632	Grazing_Y_NNG	Effect of No Grazing (vs Grazing)	parametric	-0.0415546	0.0668208	-0.621882	0.538167	NA	NA
MAN baseline 0-15 cm	Grazing (Y/N)	0.794632	s(clay_farm_mean_mean)	Clay (%)	smooth	NA	NA	3.10549	2.73049e-05	0.949078	6
MAN baseline 0-15 cm	Grazing (Y/N)	0.794632	s(Longitude_mean,Latitude_mean)	Spatial (longitude x latitude)	smooth	NA	NA	3.44874	3.74933e-07	8.79582	24
MAN baseline 0-15 cm	Grazing (Y/N)	0.794632	s(silt_farm_mean_mean)	Silt (%)	smooth	NA	NA	4.61534e-08	0.78386	1.44971e-06	6
MAN baseline 0-15 cm	Grazing (Y/N)	0.794632	s(Ca_sat_0_15cm_mean)	Ca saturation 0-15 cm	smooth	NA	NA	0.645774	0.0399263	1.25087	6
MAN baseline 0-15 cm	Conventional-Regenerative Classification	0.78836	(Intercept)	Intercept	parametric	1.42212	0.0616613	23.0633	5.43202e-22	NA	NA
MAN baseline 0-15 cm	Conventional-Regenerative Classification	0.78836	Score.Result_using_winter_cover_cropsRegenerative	Effect of management classification	parametric	0.000164632	0.0856307	0.00192258	0.998478	NA	NA
MAN baseline 0-15 cm	Conventional-Regenerative Classification	0.78836	Score.Result_using_winter_cover_cropsTransition	Effect of management classification	parametric	-0.0378695	0.121622	-0.31137	0.757469	NA	NA
MAN baseline 0-15 cm	Conventional-Regenerative Classification	0.78836	s(clay_farm_mean_mean)	Clay (%)	smooth	NA	NA	2.95615	3.62751e-05	0.946644	6
MAN baseline 0-15 cm	Conventional-Regenerative Classification	0.78836	s(Longitude_mean,Latitude_mean)	Spatial (longitude x latitude)	smooth	NA	NA	3.18828	6.85502e-07	8.72446	24
MAN baseline 0-15 cm	Conventional-Regenerative Classification	0.78836	s(silt_farm_mean_mean)	Silt (%)	smooth	NA	NA	2.73415e-08	0.782833	8.97204e-07	6
MAN baseline 0-15 cm	Conventional-Regenerative Classification	0.78836	s(Ca_sat_0_15cm_mean)	Ca saturation 0-15 cm	smooth	NA	NA	0.595437	0.043461	1.17464	6
MAN baseline 15-30 cm	Grazing (Y/N)	0.794632	(Intercept)	Intercept	parametric	1.43601	0.0444818	32.283	4.26854e-27	NA	NA
MAN baseline 15-30 cm	Grazing (Y/N)	0.794632	Grazing_Y_NNG	Effect of No Grazing (vs Grazing)	parametric	-0.0415546	0.0668208	-0.621882	0.538167	NA	NA
MAN baseline 15-30 cm	Grazing (Y/N)	0.794632	s(clay_farm_mean_mean)	Clay (%)	smooth	NA	NA	3.10549	2.73049e-05	0.949078	6
MAN baseline 15-30 cm	Grazing (Y/N)	0.794632	s(Longitude_mean,Latitude_mean)	Spatial (longitude x latitude)	smooth	NA	NA	3.44874	3.74933e-07	8.79582	24
MAN baseline 15-30 cm	Grazing (Y/N)	0.794632	s(silt_farm_mean_mean)	Silt (%)	smooth	NA	NA	4.61534e-08	0.78386	1.44971e-06	6
MAN baseline 15-30 cm	Grazing (Y/N)	0.794632	s(Ca_sat_0_15cm_mean)	Ca saturation 0-15 cm	smooth	NA	NA	0.645774	0.0399263	1.25087	6
MAN baseline 15-30 cm	Conventional-Regenerative Classification	0.78836	(Intercept)	Intercept	parametric	1.42212	0.0616613	23.0633	5.43202e-22	NA	NA
MAN baseline 15-30 cm	Conventional-Regenerative Classification	0.78836	Score.Result_using_winter_cover_cropsRegenerative	Effect of management classification	parametric	0.000164632	0.0856307	0.00192258	0.998478	NA	NA
MAN baseline 15-30 cm	Conventional-Regenerative Classification	0.78836	Score.Result_using_winter_cover_cropsTransition	Effect of management classification	parametric	-0.0378695	0.121622	-0.31137	0.757469	NA	NA
MAN baseline 15-30 cm	Conventional-Regenerative Classification	0.78836	s(clay_farm_mean_mean)	Clay (%)	smooth	NA	NA	2.95615	3.62751e-05	0.946644	6
MAN baseline 15-30 cm	Conventional-Regenerative Classification	0.78836	s(Longitude_mean,Latitude_mean)	Spatial (longitude x latitude)	smooth	NA	NA	3.18828	6.85502e-07	8.72446	24
MAN baseline 15-30 cm	Conventional-Regenerative Classification	0.78836	s(silt_farm_mean_mean)	Silt (%)	smooth	NA	NA	2.73415e-08	0.782833	8.97204e-07	6
MAN baseline 15-30 cm	Conventional-Regenerative Classification	0.78836	s(Ca_sat_0_15cm_mean)	Ca saturation 0-15 cm	smooth	NA	NA	0.595437	0.043461	1.17464	6
MAN baseline 0-30 cm	Grazing (Y/N)	0.794632	(Intercept)	Intercept	parametric	2.87202	0.0889636	32.283	4.26869e-27	NA	NA
MAN baseline 0-30 cm	Grazing (Y/N)	0.794632	Grazing_Y_NNG	Effect of No Grazing (vs Grazing)	parametric	-0.0831095	0.133642	-0.621883	0.538166	NA	NA
MAN baseline 0-30 cm	Grazing (Y/N)	0.794632	s(clay_farm_mean_mean)	Clay (%)	smooth	NA	NA	3.10549	2.73053e-05	0.949099	6
MAN baseline 0-30 cm	Grazing (Y/N)	0.794632	s(Longitude_mean,Latitude_mean)	Spatial (longitude x latitude)	smooth	NA	NA	3.44874	3.74929e-07	8.79582	24
MAN baseline 0-30 cm	Grazing (Y/N)	0.794632	s(silt_farm_mean_mean)	Silt (%)	smooth	NA	NA	1.25465e-07	0.783858	3.94098e-06	6
MAN baseline 0-30 cm	Grazing (Y/N)	0.794632	s(Ca_sat_0_15cm_mean)	Ca saturation 0-15 cm	smooth	NA	NA	0.645774	0.0399262	1.25087	6
MAN baseline 0-30 cm	Conventional-Regenerative Classification	0.78836	(Intercept)	Intercept	parametric	2.84423	0.123323	23.0633	5.43227e-22	NA	NA
MAN baseline 0-30 cm	Conventional-Regenerative Classification	0.78836	Score.Result_using_winter_cover_cropsRegenerative	Effect of management classification	parametric	0.000329453	0.171262	0.00192368	0.998477	NA	NA
MAN baseline 0-30 cm	Conventional-Regenerative Classification	0.78836	Score.Result_using_winter_cover_cropsTransition	Effect of management classification	parametric	-0.0757387	0.243245	-0.311369	0.75747	NA	NA
MAN baseline 0-30 cm	Conventional-Regenerative Classification	0.78836	s(clay_farm_mean_mean)	Clay (%)	smooth	NA	NA	2.95615	3.62757e-05	0.946669	6
MAN baseline 0-30 cm	Conventional-Regenerative Classification	0.78836	s(Longitude_mean,Latitude_mean)	Spatial (longitude x latitude)	smooth	NA	NA	3.18828	6.85495e-07	8.72446	24
MAN baseline 0-30 cm	Conventional-Regenerative Classification	0.78836	s(silt_farm_mean_mean)	Silt (%)	smooth	NA	NA	7.43255e-08	0.78283	2.43898e-06	6
MAN baseline 0-30 cm	Conventional-Regenerative Classification	0.78836	s(Ca_sat_0_15cm_mean)	Ca saturation 0-15 cm	smooth	NA	NA	0.595438	0.0434609	1.17464	6
MAN baseline 0-60 cm	Grazing (Y/N)	0.62208	(Intercept)	Intercept	parametric	4.67746	0.243496	19.2096	8.79841e-21	NA	NA
MAN baseline 0-60 cm	Grazing (Y/N)	0.62208	Grazing_Y_NNG	Effect of No Grazing (vs Grazing)	parametric	-0.237108	0.361206	-0.656435	0.515625	NA	NA
MAN baseline 0-60 cm	Grazing (Y/N)	0.62208	s(clay_farm_mean_mean)	Clay (%)	smooth	NA	NA	2.42408	7.84407e-05	0.935723	6
MAN baseline 0-60 cm	Grazing (Y/N)	0.62208	s(Longitude_mean,Latitude_mean)	Spatial (longitude x latitude)	smooth	NA	NA	1.63045	3.22983e-05	6.32154	24
MAN baseline 0-60 cm	Grazing (Y/N)	0.62208	s(silt_farm_mean_mean)	Silt (%)	smooth	NA	NA	4.27499e-06	0.483134	4.13725e-05	6
MAN baseline 0-60 cm	Grazing (Y/N)	0.62208	s(Ca_sat_0_15cm_mean)	Ca saturation 0-15 cm	smooth	NA	NA	0.330043	0.103646	0.913314	6
MAN baseline 0-60 cm	Conventional-Regenerative Classification	0.61731	(Intercept)	Intercept	parametric	4.78676	0.325972	14.6846	8.25487e-17	NA	NA
MAN baseline 0-60 cm	Conventional-Regenerative Classification	0.61731	Score.Result_using_winter_cover_cropsRegenerative	Effect of management classification	parametric	-0.256928	0.45061	-0.570178	0.572085	NA	NA
MAN baseline 0-60 cm	Conventional-Regenerative Classification	0.61731	Score.Result_using_winter_cover_cropsTransition	Effect of management classification	parametric	-0.634853	0.621719	-1.02113	0.313981	NA	NA
MAN baseline 0-60 cm	Conventional-Regenerative Classification	0.61731	s(clay_farm_mean_mean)	Clay (%)	smooth	NA	NA	2.61674	4.45434e-05	0.940137	6
MAN baseline 0-60 cm	Conventional-Regenerative Classification	0.61731	s(Longitude_mean,Latitude_mean)	Spatial (longitude x latitude)	smooth	NA	NA	1.63395	2.78715e-05	6.00537	24
MAN baseline 0-60 cm	Conventional-Regenerative Classification	0.61731	s(silt_farm_mean_mean)	Silt (%)	smooth	NA	NA	5.10507e-06	0.511206	5.42114e-05	6
MAN baseline 0-60 cm	Conventional-Regenerative Classification	0.61731	s(Ca_sat_0_15cm_mean)	Ca saturation 0-15 cm	smooth	NA	NA	0.344293	0.0950639	0.908275	6
MAN baseline 30-60 cm	Grazing (Y/N)	0.62208	(Intercept)	Intercept	parametric	2.33873	0.121748	19.2096	8.79841e-21	NA	NA
MAN baseline 30-60 cm	Grazing (Y/N)	0.62208	Grazing_Y_NNG	Effect of No Grazing (vs Grazing)	parametric	-0.118554	0.180603	-0.656435	0.515625	NA	NA
MAN baseline 30-60 cm	Grazing (Y/N)	0.62208	s(clay_farm_mean_mean)	Clay (%)	smooth	NA	NA	2.42408	7.84407e-05	0.935723	6
MAN baseline 30-60 cm	Grazing (Y/N)	0.62208	s(Longitude_mean,Latitude_mean)	Spatial (longitude x latitude)	smooth	NA	NA	1.63045	3.22983e-05	6.32154	24
MAN baseline 30-60 cm	Grazing (Y/N)	0.62208	s(silt_farm_mean_mean)	Silt (%)	smooth	NA	NA	4.27499e-06	0.483134	4.13725e-05	6
MAN baseline 30-60 cm	Grazing (Y/N)	0.62208	s(Ca_sat_0_15cm_mean)	Ca saturation 0-15 cm	smooth	NA	NA	0.330043	0.103646	0.913314	6
MAN baseline 30-60 cm	Conventional-Regenerative Classification	0.61731	(Intercept)	Intercept	parametric	2.39338	0.162986	14.6846	8.25486e-17	NA	NA
MAN baseline 30-60 cm	Conventional-Regenerative Classification	0.61731	Score.Result_using_winter_cover_cropsRegenerative	Effect of management classification	parametric	-0.128464	0.225305	-0.570177	0.572085	NA	NA
MAN baseline 30-60 cm	Conventional-Regenerative Classification	0.61731	Score.Result_using_winter_cover_cropsTransition	Effect of management classification	parametric	-0.317427	0.31086	-1.02113	0.313981	NA	NA
MAN baseline 30-60 cm	Conventional-Regenerative Classification	0.61731	s(clay_farm_mean_mean)	Clay (%)	smooth	NA	NA	2.61674	4.45435e-05	0.940137	6
MAN baseline 30-60 cm	Conventional-Regenerative Classification	0.61731	s(Longitude_mean,Latitude_mean)	Spatial (longitude x latitude)	smooth	NA	NA	1.63395	2.78715e-05	6.00537	24
MAN baseline 30-60 cm	Conventional-Regenerative Classification	0.61731	s(silt_farm_mean_mean)	Silt (%)	smooth	NA	NA	5.10507e-06	0.511206	5.42114e-05	6
MAN baseline 30-60 cm	Conventional-Regenerative Classification	0.61731	s(Ca_sat_0_15cm_mean)	Ca saturation 0-15 cm	smooth	NA	NA	0.344293	0.0950636	0.908273	6
MAN stock 0-15 cm	Grazing (Y/N)	0.834294	(Intercept)	Intercept	parametric	2.26389	0.0518707	43.6448	1.39514e-29	NA	NA
MAN stock 0-15 cm	Grazing (Y/N)	0.834294	Grazing_Y_NNG	Effect of No Grazing (vs Grazing)	parametric	-0.254106	0.0791264	-3.2114	0.00305433	NA	NA
MAN stock 0-15 cm	Grazing (Y/N)	0.834294	s(clay_farm_mean_mean)	Clay (%)	smooth	NA	NA	2.09984	0.000375686	0.926489	6
MAN stock 0-15 cm	Grazing (Y/N)	0.834294	s(Longitude_mean,Latitude_mean)	Spatial (longitude x latitude)	smooth	NA	NA	4.20604	0	10.2051	24
MAN stock 0-15 cm	Grazing (Y/N)	0.834294	s(silt_farm_mean_mean)	Silt (%)	smooth	NA	NA	0.273441	0.113339	0.836337	6
MAN stock 0-15 cm	Grazing (Y/N)	0.834294	s(Ca_sat_0_15cm_mean)	Ca saturation 0-15 cm	smooth	NA	NA	1.38374	0.00645226	1.76976	6
MAN stock 0-15 cm	Conventional-Regenerative Classification	0.793561	(Intercept)	Intercept	parametric	2.05355	0.0796487	25.7826	1.20987e-22	NA	NA
MAN stock 0-15 cm	Conventional-Regenerative Classification	0.793561	Score.Result_using_winter_cover_cropsRegenerative	Effect of management classification	parametric	0.181184	0.111015	1.63206	0.112692	NA	NA
MAN stock 0-15 cm	Conventional-Regenerative Classification	0.793561	Score.Result_using_winter_cover_cropsTransition	Effect of management classification	parametric	0.0183064	0.159021	0.115119	0.909086	NA	NA
MAN stock 0-15 cm	Conventional-Regenerative Classification	0.793561	s(clay_farm_mean_mean)	Clay (%)	smooth	NA	NA	1.60204	0.00125254	0.905797	6
MAN stock 0-15 cm	Conventional-Regenerative Classification	0.793561	s(Longitude_mean,Latitude_mean)	Spatial (longitude x latitude)	smooth	NA	NA	3.37613	1.00855e-06	9.90124	24
MAN stock 0-15 cm	Conventional-Regenerative Classification	0.793561	s(silt_farm_mean_mean)	Silt (%)	smooth	NA	NA	0.0961269	0.205931	0.418932	6
MAN stock 0-15 cm	Conventional-Regenerative Classification	0.793561	s(Ca_sat_0_15cm_mean)	Ca saturation 0-15 cm	smooth	NA	NA	0.90175	0.0209091	1.48389	6
MAN stock 15-30 cm	Grazing (Y/N)	0.826381	(Intercept)	Intercept	parametric	1.61174	0.0418555	38.5073	2.71814e-29	NA	NA
MAN stock 15-30 cm	Grazing (Y/N)	0.826381	Grazing_Y_NNG	Effect of No Grazing (vs Grazing)	parametric	-0.0734366	0.0630626	-1.1645	0.252457	NA	NA
MAN stock 15-30 cm	Grazing (Y/N)	0.826381	s(clay_farm_mean_mean)	Clay (%)	smooth	NA	NA	3.53859	1.27307e-05	0.955028	6
MAN stock 15-30 cm	Grazing (Y/N)	0.826381	s(Longitude_mean,Latitude_mean)	Spatial (longitude x latitude)	smooth	NA	NA	4.11681	0	9.21186	24
MAN stock 15-30 cm	Grazing (Y/N)	0.826381	s(silt_farm_mean_mean)	Silt (%)	smooth	NA	NA	6.1536e-08	0.511936	8.60211e-07	6
MAN stock 15-30 cm	Grazing (Y/N)	0.826381	s(Ca_sat_0_15cm_mean)	Ca saturation 0-15 cm	smooth	NA	NA	0.806021	0.0258607	1.37686	6
MAN stock 15-30 cm	Conventional-Regenerative Classification	0.818219	(Intercept)	Intercept	parametric	1.55263	0.058682	26.4584	1.27342e-23	NA	NA
MAN stock 15-30 cm	Conventional-Regenerative Classification	0.818219	Score.Result_using_winter_cover_cropsRegenerative	Effect of management classification	parametric	0.0512914	0.0815379	0.629049	0.533696	NA	NA
MAN stock 15-30 cm	Conventional-Regenerative Classification	0.818219	Score.Result_using_winter_cover_cropsTransition	Effect of management classification	parametric	-0.0024524	0.116286	-0.0210894	0.983303	NA	NA
MAN stock 15-30 cm	Conventional-Regenerative Classification	0.818219	s(clay_farm_mean_mean)	Clay (%)	smooth	NA	NA	3.17301	2.43542e-05	0.950103	6
MAN stock 15-30 cm	Conventional-Regenerative Classification	0.818219	s(Longitude_mean,Latitude_mean)	Spatial (longitude x latitude)	smooth	NA	NA	3.60806	4.38176e-07	9.12611	24
MAN stock 15-30 cm	Conventional-Regenerative Classification	0.818219	s(silt_farm_mean_mean)	Silt (%)	smooth	NA	NA	4.02684e-08	0.609292	7.02957e-07	6
MAN stock 15-30 cm	Conventional-Regenerative Classification	0.818219	s(Ca_sat_0_15cm_mean)	Ca saturation 0-15 cm	smooth	NA	NA	0.736542	0.0293296	1.29424	6
MAN stock 0-30 cm	Grazing (Y/N)	0.852721	(Intercept)	Intercept	parametric	3.87365	0.0847814	45.6898	1.21337e-30	NA	NA
MAN stock 0-30 cm	Grazing (Y/N)	0.852721	Grazing_Y_NNG	Effect of No Grazing (vs Grazing)	parametric	-0.323313	0.12888	-2.50864	0.0173987	NA	NA
MAN stock 0-30 cm	Grazing (Y/N)	0.852721	s(clay_farm_mean_mean)	Clay (%)	smooth	NA	NA	3.20904	2.89862e-05	0.950654	6
MAN stock 0-30 cm	Grazing (Y/N)	0.852721	s(Longitude_mean,Latitude_mean)	Spatial (longitude x latitude)	smooth	NA	NA	4.78745	0	10.1043	24
MAN stock 0-30 cm	Grazing (Y/N)	0.852721	s(silt_farm_mean_mean)	Silt (%)	smooth	NA	NA	0.0801905	0.222269	0.36523	6
MAN stock 0-30 cm	Grazing (Y/N)	0.852721	s(Ca_sat_0_15cm_mean)	Ca saturation 0-15 cm	smooth	NA	NA	1.3253	0.00678318	1.68276	6
MAN stock 0-30 cm	Conventional-Regenerative Classification	0.831348	(Intercept)	Intercept	parametric	3.60523	0.124825	28.8821	2.92054e-24	NA	NA
MAN stock 0-30 cm	Conventional-Regenerative Classification	0.831348	Score.Result_using_winter_cover_cropsRegenerative	Effect of management classification	parametric	0.231207	0.17369	1.33115	0.192679	NA	NA
MAN stock 0-30 cm	Conventional-Regenerative Classification	0.831348	Score.Result_using_winter_cover_cropsTransition	Effect of management classification	parametric	0.0264523	0.249458	0.106039	0.916223	NA	NA
MAN stock 0-30 cm	Conventional-Regenerative Classification	0.831348	s(clay_farm_mean_mean)	Clay (%)	smooth	NA	NA	2.66611	9.26613e-05	0.941206	6
MAN stock 0-30 cm	Conventional-Regenerative Classification	0.831348	s(Longitude_mean,Latitude_mean)	Spatial (longitude x latitude)	smooth	NA	NA	4.14588	0	10.0189	24
MAN stock 0-30 cm	Conventional-Regenerative Classification	0.831348	s(silt_farm_mean_mean)	Silt (%)	smooth	NA	NA	5.33321e-05	0.312855	0.000330471	6
MAN stock 0-30 cm	Conventional-Regenerative Classification	0.831348	s(Ca_sat_0_15cm_mean)	Ca saturation 0-15 cm	smooth	NA	NA	1.01163	0.0142337	1.48837	6
MAN stock 30-60 cm	Grazing (Y/N)	0.732647	(Intercept)	Intercept	parametric	2.54955	0.100487	25.3719	5.31643e-24	NA	NA
MAN stock 30-60 cm	Grazing (Y/N)	0.732647	Grazing_Y_NNG	Effect of No Grazing (vs Grazing)	parametric	-0.0917932	0.150408	-0.610293	0.545641	NA	NA
MAN stock 30-60 cm	Grazing (Y/N)	0.732647	s(clay_farm_mean_mean)	Clay (%)	smooth	NA	NA	2.36283	0.000134157	0.934145	6
MAN stock 30-60 cm	Grazing (Y/N)	0.732647	s(Longitude_mean,Latitude_mean)	Spatial (longitude x latitude)	smooth	NA	NA	2.61321	1.77468e-06	8.23325	24
MAN stock 30-60 cm	Grazing (Y/N)	0.732647	s(silt_farm_mean_mean)	Silt (%)	smooth	NA	NA	1.64521e-06	0.640038	2.64647e-05	6
MAN stock 30-60 cm	Grazing (Y/N)	0.732647	s(Ca_sat_0_15cm_mean)	Ca saturation 0-15 cm	smooth	NA	NA	0.51261	0.0563319	1.10598	6
MAN stock 30-60 cm	Conventional-Regenerative Classification	0.727566	(Intercept)	Intercept	parametric	2.55847	0.137854	18.5593	2.57793e-19	NA	NA
MAN stock 30-60 cm	Conventional-Regenerative Classification	0.727566	Score.Result_using_winter_cover_cropsRegenerative	Effect of management classification	parametric	-0.0489533	0.19124	-0.255979	0.799516	NA	NA
MAN stock 30-60 cm	Conventional-Regenerative Classification	0.727566	Score.Result_using_winter_cover_cropsTransition	Effect of management classification	parametric	-0.187529	0.270271	-0.693854	0.492509	NA	NA
MAN stock 30-60 cm	Conventional-Regenerative Classification	0.727566	s(clay_farm_mean_mean)	Clay (%)	smooth	NA	NA	2.3515	0.000129413	0.933827	6
MAN stock 30-60 cm	Conventional-Regenerative Classification	0.727566	s(Longitude_mean,Latitude_mean)	Spatial (longitude x latitude)	smooth	NA	NA	2.53598	2.58344e-06	8.14846	24
MAN stock 30-60 cm	Conventional-Regenerative Classification	0.727566	s(silt_farm_mean_mean)	Silt (%)	smooth	NA	NA	1.49041e-06	0.634059	2.38684e-05	6
MAN stock 30-60 cm	Conventional-Regenerative Classification	0.727566	s(Ca_sat_0_15cm_mean)	Ca saturation 0-15 cm	smooth	NA	NA	0.504414	0.0547018	1.06819	6
MAN stock 0-60 cm	Grazing (Y/N)	0.802305	(Intercept)	Intercept	parametric	6.42033	0.178999	35.8679	3.53668e-28	NA	NA
MAN stock 0-60 cm	Grazing (Y/N)	0.802305	Grazing_Y_NNG	Effect of No Grazing (vs Grazing)	parametric	-0.40898	0.269989	-1.5148	0.139265	NA	NA
MAN stock 0-60 cm	Grazing (Y/N)	0.802305	s(clay_farm_mean_mean)	Clay (%)	smooth	NA	NA	2.83075	5.88044e-05	0.944473	6
MAN stock 0-60 cm	Grazing (Y/N)	0.802305	s(Longitude_mean,Latitude_mean)	Spatial (longitude x latitude)	smooth	NA	NA	3.53286	0	9.37725	24
MAN stock 0-60 cm	Grazing (Y/N)	0.802305	s(silt_farm_mean_mean)	Silt (%)	smooth	NA	NA	8.48625e-06	0.425201	7.14783e-05	6
MAN stock 0-60 cm	Grazing (Y/N)	0.802305	s(Ca_sat_0_15cm_mean)	Ca saturation 0-15 cm	smooth	NA	NA	0.866312	0.0212141	1.40131	6
MAN stock 0-60 cm	Conventional-Regenerative Classification	0.788776	(Intercept)	Intercept	parametric	6.16545	0.253574	24.3142	1.99482e-22	NA	NA
MAN stock 0-60 cm	Conventional-Regenerative Classification	0.788776	Score.Result_using_winter_cover_cropsRegenerative	Effect of management classification	parametric	0.183096	0.352442	0.519506	0.606927	NA	NA
MAN stock 0-60 cm	Conventional-Regenerative Classification	0.788776	Score.Result_using_winter_cover_cropsTransition	Effect of management classification	parametric	-0.175615	0.50295	-0.349169	0.729214	NA	NA
MAN stock 0-60 cm	Conventional-Regenerative Classification	0.788776	s(clay_farm_mean_mean)	Clay (%)	smooth	NA	NA	2.55168	0.000101239	0.938736	6
MAN stock 0-60 cm	Conventional-Regenerative Classification	0.788776	s(Longitude_mean,Latitude_mean)	Spatial (longitude x latitude)	smooth	NA	NA	3.26502	7.52842e-07	9.27055	24
MAN stock 0-60 cm	Conventional-Regenerative Classification	0.788776	s(silt_farm_mean_mean)	Silt (%)	smooth	NA	NA	1.85118e-06	0.471954	1.85467e-05	6
MAN stock 0-60 cm	Conventional-Regenerative Classification	0.788776	s(Ca_sat_0_15cm_mean)	Ca saturation 0-15 cm	smooth	NA	NA	0.759794	0.0258126	1.28239	6
MAN RZE 0-15 cm	Grazing (Y/N)	0.562235	(Intercept)	Intercept	parametric	0.836691	0.0463586	18.0482	1.73789e-20	NA	NA
MAN RZE 0-15 cm	Grazing (Y/N)	0.562235	Grazing_Y_NNG	Effect of No Grazing (vs Grazing)	parametric	-0.231378	0.0684921	-3.37817	0.00167072	NA	NA
MAN RZE 0-15 cm	Grazing (Y/N)	0.562235	s(clay_farm_mean_mean)	Clay (%)	smooth	NA	NA	7.37271e-08	0.943206	6.81145e-06	6
MAN RZE 0-15 cm	Grazing (Y/N)	0.562235	s(Longitude_mean,Latitude_mean)	Spatial (longitude x latitude)	smooth	NA	NA	1.57326	4.93163e-06	4.46015	24
MAN RZE 0-15 cm	Grazing (Y/N)	0.562235	s(silt_farm_mean_mean)	Silt (%)	smooth	NA	NA	0.480057	0.0724346	1.15669	6
MAN RZE 0-15 cm	Grazing (Y/N)	0.562235	s(Ca_sat_0_15cm_mean)	Ca saturation 0-15 cm	smooth	NA	NA	0.111086	0.258773	0.538096	6
MAN RZE 0-15 cm	Conventional-Regenerative Classification	0.466385	(Intercept)	Intercept	parametric	0.640793	0.0652236	9.82456	3.70752e-12	NA	NA
MAN RZE 0-15 cm	Conventional-Regenerative Classification	0.466385	Score.Result_using_winter_cover_cropsRegenerative	Effect of management classification	parametric	0.188297	0.0890422	2.11469	0.0408224	NA	NA
MAN RZE 0-15 cm	Conventional-Regenerative Classification	0.466385	Score.Result_using_winter_cover_cropsTransition	Effect of management classification	parametric	-0.0305594	0.122438	-0.249591	0.804198	NA	NA
MAN RZE 0-15 cm	Conventional-Regenerative Classification	0.466385	s(clay_farm_mean_mean)	Clay (%)	smooth	NA	NA	1.25432e-07	0.812514	4.2561e-06	6
MAN RZE 0-15 cm	Conventional-Regenerative Classification	0.466385	s(Longitude_mean,Latitude_mean)	Spatial (longitude x latitude)	smooth	NA	NA	0.882648	0.000300075	3.59711	24
MAN RZE 0-15 cm	Conventional-Regenerative Classification	0.466385	s(silt_farm_mean_mean)	Silt (%)	smooth	NA	NA	0.322002	0.116529	0.935577	6
MAN RZE 0-15 cm	Conventional-Regenerative Classification	0.466385	s(Ca_sat_0_15cm_mean)	Ca saturation 0-15 cm	smooth	NA	NA	1.06211e-06	0.505552	1.09952e-05	6
MAN RZE 15-30 cm	Grazing (Y/N)	0.631285	(Intercept)	Intercept	parametric	0.176663	0.00954891	18.5008	8.94534e-21	NA	NA
MAN RZE 15-30 cm	Grazing (Y/N)	0.631285	Grazing_Y_NNG	Effect of No Grazing (vs Grazing)	parametric	-0.0338698	0.0140987	-2.40233	0.0212077	NA	NA
MAN RZE 15-30 cm	Grazing (Y/N)	0.631285	s(clay_farm_mean_mean)	Clay (%)	smooth	NA	NA	3.32673e-06	0.526693	3.95434e-05	6
MAN RZE 15-30 cm	Grazing (Y/N)	0.631285	s(Longitude_mean,Latitude_mean)	Spatial (longitude x latitude)	smooth	NA	NA	2.69691	0	5.92407	24
MAN RZE 15-30 cm	Grazing (Y/N)	0.631285	s(silt_farm_mean_mean)	Silt (%)	smooth	NA	NA	0.176466	0.136504	0.514432	6
MAN RZE 15-30 cm	Grazing (Y/N)	0.631285	s(Ca_sat_0_15cm_mean)	Ca saturation 0-15 cm	smooth	NA	NA	3.84507e-06	0.502044	4.20714e-05	6
MAN RZE 15-30 cm	Conventional-Regenerative Classification	0.634193	(Intercept)	Intercept	parametric	0.125995	0.0122636	10.2739	1.10651e-12	NA	NA
MAN RZE 15-30 cm	Conventional-Regenerative Classification	0.634193	Score.Result_using_winter_cover_cropsRegenerative	Effect of management classification	parametric	0.0622122	0.016773	3.70906	0.000643024	NA	NA
MAN RZE 15-30 cm	Conventional-Regenerative Classification	0.634193	Score.Result_using_winter_cover_cropsTransition	Effect of management classification	parametric	0.0293393	0.0231495	1.26739	0.212489	NA	NA
MAN RZE 15-30 cm	Conventional-Regenerative Classification	0.634193	s(clay_farm_mean_mean)	Clay (%)	smooth	NA	NA	2.7673e-06	0.524208	3.22494e-05	6
MAN RZE 15-30 cm	Conventional-Regenerative Classification	0.634193	s(Longitude_mean,Latitude_mean)	Spatial (longitude x latitude)	smooth	NA	NA	1.58232	5.90065e-06	4.42881	24
MAN RZE 15-30 cm	Conventional-Regenerative Classification	0.634193	s(silt_farm_mean_mean)	Silt (%)	smooth	NA	NA	0.0876287	0.203117	0.344616	6
MAN RZE 15-30 cm	Conventional-Regenerative Classification	0.634193	s(Ca_sat_0_15cm_mean)	Ca saturation 0-15 cm	smooth	NA	NA	5.37221e-06	0.424143	4.33594e-05	6
MAN RZE 0-30 cm	Grazing (Y/N)	0.666237	(Intercept)	Intercept	parametric	1.01284	0.0469861	21.5563	1.3591e-22	NA	NA
MAN RZE 0-30 cm	Grazing (Y/N)	0.666237	Grazing_Y_NNG	Effect of No Grazing (vs Grazing)	parametric	-0.264158	0.069811	-3.7839	0.000545696	NA	NA
MAN RZE 0-30 cm	Grazing (Y/N)	0.666237	s(clay_farm_mean_mean)	Clay (%)	smooth	NA	NA	5.04422e-08	0.984915	1.02805e-05	6
MAN RZE 0-30 cm	Grazing (Y/N)	0.666237	s(Longitude_mean,Latitude_mean)	Spatial (longitude x latitude)	smooth	NA	NA	2.45739	2.45694e-07	5.38445	24
MAN RZE 0-30 cm	Grazing (Y/N)	0.666237	s(silt_farm_mean_mean)	Silt (%)	smooth	NA	NA	0.605449	0.0516382	1.30343	6
MAN RZE 0-30 cm	Grazing (Y/N)	0.666237	s(Ca_sat_0_15cm_mean)	Ca saturation 0-15 cm	smooth	NA	NA	0.350972	0.146201	1.17329	6
MAN RZE 0-30 cm	Conventional-Regenerative Classification	0.568122	(Intercept)	Intercept	parametric	0.770179	0.0686509	11.2188	9.78584e-14	NA	NA
MAN RZE 0-30 cm	Conventional-Regenerative Classification	0.568122	Score.Result_using_winter_cover_cropsRegenerative	Effect of management classification	parametric	0.242906	0.0941437	2.58017	0.0137838	NA	NA
MAN RZE 0-30 cm	Conventional-Regenerative Classification	0.568122	Score.Result_using_winter_cover_cropsTransition	Effect of management classification	parametric	0.000990991	0.129133	0.00767416	0.993916	NA	NA
MAN RZE 0-30 cm	Conventional-Regenerative Classification	0.568122	s(clay_farm_mean_mean)	Clay (%)	smooth	NA	NA	4.69776e-07	0.802052	1.51073e-05	6
MAN RZE 0-30 cm	Conventional-Regenerative Classification	0.568122	s(Longitude_mean,Latitude_mean)	Spatial (longitude x latitude)	smooth	NA	NA	1.31615	2.55537e-05	4.26531	24
MAN RZE 0-30 cm	Conventional-Regenerative Classification	0.568122	s(silt_farm_mean_mean)	Silt (%)	smooth	NA	NA	0.359447	0.103823	0.995574	6
MAN RZE 0-30 cm	Conventional-Regenerative Classification	0.568122	s(Ca_sat_0_15cm_mean)	Ca saturation 0-15 cm	smooth	NA	NA	1.76339e-07	0.476945	1.94522e-06	6
MAN RZE 30-60 cm	Grazing (Y/N)	0.0991979	(Intercept)	Intercept	parametric	0.209238	0.0349164	5.99255	3.80237e-07	NA	NA
MAN RZE 30-60 cm	Grazing (Y/N)	0.0991979	Grazing_Y_NNG	Effect of No Grazing (vs Grazing)	parametric	0.0301393	0.0511113	0.58968	0.558504	NA	NA
MAN RZE 30-60 cm	Grazing (Y/N)	0.0991979	s(clay_farm_mean_mean)	Clay (%)	smooth	NA	NA	4.31112e-07	0.433115	3.77245e-06	6
MAN RZE 30-60 cm	Grazing (Y/N)	0.0991979	s(Longitude_mean,Latitude_mean)	Spatial (longitude x latitude)	smooth	NA	NA	0.242666	0.0443333	2.17413	24
MAN RZE 30-60 cm	Grazing (Y/N)	0.0991979	s(silt_farm_mean_mean)	Silt (%)	smooth	NA	NA	1.02407e-08	0.875137	5.90713e-07	6
MAN RZE 30-60 cm	Grazing (Y/N)	0.0991979	s(Ca_sat_0_15cm_mean)	Ca saturation 0-15 cm	smooth	NA	NA	1.68694e-06	0.554733	1.94754e-05	6
MAN RZE 30-60 cm	Conventional-Regenerative Classification	0.120049	(Intercept)	Intercept	parametric	0.173292	0.0428219	4.0468	0.000217202	NA	NA
MAN RZE 30-60 cm	Conventional-Regenerative Classification	0.120049	Score.Result_using_winter_cover_cropsRegenerative	Effect of management classification	parametric	0.0620491	0.0575648	1.0779	0.287211	NA	NA
MAN RZE 30-60 cm	Conventional-Regenerative Classification	0.120049	Score.Result_using_winter_cover_cropsTransition	Effect of management classification	parametric	0.132202	0.0800416	1.65167	0.106037	NA	NA
MAN RZE 30-60 cm	Conventional-Regenerative Classification	0.120049	s(clay_farm_mean_mean)	Clay (%)	smooth	NA	NA	1.83356e-07	0.680331	4.62404e-06	6
MAN RZE 30-60 cm	Conventional-Regenerative Classification	0.120049	s(Longitude_mean,Latitude_mean)	Spatial (longitude x latitude)	smooth	NA	NA	0.191449	0.0621622	1.86655	24
MAN RZE 30-60 cm	Conventional-Regenerative Classification	0.120049	s(silt_farm_mean_mean)	Silt (%)	smooth	NA	NA	1.29097e-08	0.94979	1.20637e-06	6
MAN RZE 30-60 cm	Conventional-Regenerative Classification	0.120049	s(Ca_sat_0_15cm_mean)	Ca saturation 0-15 cm	smooth	NA	NA	2.0871e-06	0.369699	1.39675e-05	6
MAN RZE 0-60 cm	Grazing (Y/N)	0.765232	(Intercept)	Intercept	parametric	1.22336	0.0445116	27.484	1.22561e-25	NA	NA
MAN RZE 0-60 cm	Grazing (Y/N)	0.765232	Grazing_Y_NNG	Effect of No Grazing (vs Grazing)	parametric	-0.236746	0.0664513	-3.5627	0.00106255	NA	NA
MAN RZE 0-60 cm	Grazing (Y/N)	0.765232	s(clay_farm_mean_mean)	Clay (%)	smooth	NA	NA	4.20739e-07	0.786561	1.25804e-05	6
MAN RZE 0-60 cm	Grazing (Y/N)	0.765232	s(Longitude_mean,Latitude_mean)	Spatial (longitude x latitude)	smooth	NA	NA	4.27646	0	6.3522	24
MAN RZE 0-60 cm	Grazing (Y/N)	0.765232	s(silt_farm_mean_mean)	Silt (%)	smooth	NA	NA	0.336966	0.106512	0.973376	6
MAN RZE 0-60 cm	Grazing (Y/N)	0.765232	s(Ca_sat_0_15cm_mean)	Ca saturation 0-15 cm	smooth	NA	NA	1.18073	0.0180094	1.91992	6
MAN RZE 0-60 cm	Conventional-Regenerative Classification	0.730333	(Intercept)	Intercept	parametric	0.952351	0.0629594	15.1264	3.6163e-17	NA	NA
MAN RZE 0-60 cm	Conventional-Regenerative Classification	0.730333	Score.Result_using_winter_cover_cropsRegenerative	Effect of management classification	parametric	0.267245	0.0861727	3.10128	0.00373547	NA	NA
MAN RZE 0-60 cm	Conventional-Regenerative Classification	0.730333	Score.Result_using_winter_cover_cropsTransition	Effect of management classification	parametric	0.197471	0.123473	1.59931	0.1185	NA	NA
MAN RZE 0-60 cm	Conventional-Regenerative Classification	0.730333	s(clay_farm_mean_mean)	Clay (%)	smooth	NA	NA	2.03415e-08	0.971036	3.14828e-06	6
MAN RZE 0-60 cm	Conventional-Regenerative Classification	0.730333	s(Longitude_mean,Latitude_mean)	Spatial (longitude x latitude)	smooth	NA	NA	2.85889	0	5.74516	24
MAN RZE 0-60 cm	Conventional-Regenerative Classification	0.730333	s(silt_farm_mean_mean)	Silt (%)	smooth	NA	NA	0.0602717	0.221264	0.26562	6
MAN RZE 0-60 cm	Conventional-Regenerative Classification	0.730333	s(Ca_sat_0_15cm_mean)	Ca saturation 0-15 cm	smooth	NA	NA	1.14157	0.0240685	2.0167	6
PN baseline 0-15 cm	Grazing (Y/N)	0.392759	(Intercept)	Intercept	parametric	0.266396	0.0163702	16.2733	5.56304e-19	NA	NA
PN baseline 0-15 cm	Grazing (Y/N)	0.392759	Grazing_Y_NNG	Effect of No Grazing (vs Grazing)	parametric	-0.00284855	0.0241507	-0.117949	0.906713	NA	NA
PN baseline 0-15 cm	Grazing (Y/N)	0.392759	s(clay_farm_mean_mean)	Clay (%)	smooth	NA	NA	1.2446e-06	0.364576	9.8911e-06	6
PN baseline 0-15 cm	Grazing (Y/N)	0.392759	s(Longitude_mean,Latitude_mean)	Spatial (longitude x latitude)	smooth	NA	NA	1.18045	0.000104688	4.6166	24
PN baseline 0-15 cm	Grazing (Y/N)	0.392759	s(silt_farm_mean_mean)	Silt (%)	smooth	NA	NA	0.294699	0.0881285	0.638797	6
PN baseline 0-15 cm	Grazing (Y/N)	0.392759	s(Ca_sat_0_15cm_mean)	Ca saturation 0-15 cm	smooth	NA	NA	0.47269	0.049303	0.739332	6
PN baseline 0-15 cm	Conventional-Regenerative Classification	0.42263	(Intercept)	Intercept	parametric	0.30051	0.0212125	14.1667	7.71494e-17	NA	NA
PN baseline 0-15 cm	Conventional-Regenerative Classification	0.42263	Score.Result_using_winter_cover_cropsRegenerative	Effect of management classification	parametric	-0.0591112	0.0285744	-2.06867	0.0453525	NA	NA
PN baseline 0-15 cm	Conventional-Regenerative Classification	0.42263	Score.Result_using_winter_cover_cropsTransition	Effect of management classification	parametric	-0.0412254	0.0431157	-0.956157	0.34497	NA	NA
PN baseline 0-15 cm	Conventional-Regenerative Classification	0.42263	s(clay_farm_mean_mean)	Clay (%)	smooth	NA	NA	1.25134e-06	0.481034	1.85297e-05	6
PN baseline 0-15 cm	Conventional-Regenerative Classification	0.42263	s(Longitude_mean,Latitude_mean)	Spatial (longitude x latitude)	smooth	NA	NA	1.26231	4.31371e-05	4.28896	24
PN baseline 0-15 cm	Conventional-Regenerative Classification	0.42263	s(silt_farm_mean_mean)	Silt (%)	smooth	NA	NA	0.156506	0.150548	0.484292	6
PN baseline 0-15 cm	Conventional-Regenerative Classification	0.42263	s(Ca_sat_0_15cm_mean)	Ca saturation 0-15 cm	smooth	NA	NA	0.660375	0.0266429	0.798484	6
PN baseline 15-30 cm	Grazing (Y/N)	0.392759	(Intercept)	Intercept	parametric	0.266396	0.0163702	16.2733	5.56304e-19	NA	NA
PN baseline 15-30 cm	Grazing (Y/N)	0.392759	Grazing_Y_NNG	Effect of No Grazing (vs Grazing)	parametric	-0.00284855	0.0241507	-0.117949	0.906713	NA	NA
PN baseline 15-30 cm	Grazing (Y/N)	0.392759	s(clay_farm_mean_mean)	Clay (%)	smooth	NA	NA	1.2446e-06	0.364576	9.8911e-06	6
PN baseline 15-30 cm	Grazing (Y/N)	0.392759	s(Longitude_mean,Latitude_mean)	Spatial (longitude x latitude)	smooth	NA	NA	1.18045	0.000104688	4.6166	24
PN baseline 15-30 cm	Grazing (Y/N)	0.392759	s(silt_farm_mean_mean)	Silt (%)	smooth	NA	NA	0.294699	0.0881285	0.638797	6
PN baseline 15-30 cm	Grazing (Y/N)	0.392759	s(Ca_sat_0_15cm_mean)	Ca saturation 0-15 cm	smooth	NA	NA	0.47269	0.049303	0.739332	6
PN baseline 15-30 cm	Conventional-Regenerative Classification	0.42263	(Intercept)	Intercept	parametric	0.30051	0.0212125	14.1667	7.71494e-17	NA	NA
PN baseline 15-30 cm	Conventional-Regenerative Classification	0.42263	Score.Result_using_winter_cover_cropsRegenerative	Effect of management classification	parametric	-0.0591112	0.0285744	-2.06867	0.0453525	NA	NA
PN baseline 15-30 cm	Conventional-Regenerative Classification	0.42263	Score.Result_using_winter_cover_cropsTransition	Effect of management classification	parametric	-0.0412254	0.0431157	-0.956157	0.34497	NA	NA
PN baseline 15-30 cm	Conventional-Regenerative Classification	0.42263	s(clay_farm_mean_mean)	Clay (%)	smooth	NA	NA	1.25134e-06	0.481034	1.85297e-05	6
PN baseline 15-30 cm	Conventional-Regenerative Classification	0.42263	s(Longitude_mean,Latitude_mean)	Spatial (longitude x latitude)	smooth	NA	NA	1.26231	4.31371e-05	4.28896	24
PN baseline 15-30 cm	Conventional-Regenerative Classification	0.42263	s(silt_farm_mean_mean)	Silt (%)	smooth	NA	NA	0.156506	0.150548	0.484292	6
PN baseline 15-30 cm	Conventional-Regenerative Classification	0.42263	s(Ca_sat_0_15cm_mean)	Ca saturation 0-15 cm	smooth	NA	NA	0.660375	0.0266429	0.798484	6
PN baseline 0-30 cm	Grazing (Y/N)	0.392759	(Intercept)	Intercept	parametric	0.532793	0.0327404	16.2733	5.56281e-19	NA	NA
PN baseline 0-30 cm	Grazing (Y/N)	0.392759	Grazing_Y_NNG	Effect of No Grazing (vs Grazing)	parametric	-0.00569704	0.0483014	-0.117948	0.906714	NA	NA
PN baseline 0-30 cm	Grazing (Y/N)	0.392759	s(clay_farm_mean_mean)	Clay (%)	smooth	NA	NA	1.6844e-07	0.364577	1.33863e-06	6
PN baseline 0-30 cm	Grazing (Y/N)	0.392759	s(Longitude_mean,Latitude_mean)	Spatial (longitude x latitude)	smooth	NA	NA	1.18046	0.000104686	4.6166	24
PN baseline 0-30 cm	Grazing (Y/N)	0.392759	s(silt_farm_mean_mean)	Silt (%)	smooth	NA	NA	0.294694	0.0881259	0.638756	6
PN baseline 0-30 cm	Grazing (Y/N)	0.392759	s(Ca_sat_0_15cm_mean)	Ca saturation 0-15 cm	smooth	NA	NA	0.472692	0.0493023	0.739323	6
PN baseline 0-30 cm	Conventional-Regenerative Classification	0.42263	(Intercept)	Intercept	parametric	0.60102	0.0424249	14.1667	7.71479e-17	NA	NA
PN baseline 0-30 cm	Conventional-Regenerative Classification	0.42263	Score.Result_using_winter_cover_cropsRegenerative	Effect of management classification	parametric	-0.118222	0.0571489	-2.06867	0.0453524	NA	NA
PN baseline 0-30 cm	Conventional-Regenerative Classification	0.42263	Score.Result_using_winter_cover_cropsTransition	Effect of management classification	parametric	-0.0824508	0.0862313	-0.956158	0.344969	NA	NA
PN baseline 0-30 cm	Conventional-Regenerative Classification	0.42263	s(clay_farm_mean_mean)	Clay (%)	smooth	NA	NA	5.33731e-07	0.471247	7.37008e-06	6
PN baseline 0-30 cm	Conventional-Regenerative Classification	0.42263	s(Longitude_mean,Latitude_mean)	Spatial (longitude x latitude)	smooth	NA	NA	1.26233	4.3135e-05	4.28896	24
PN baseline 0-30 cm	Conventional-Regenerative Classification	0.42263	s(silt_farm_mean_mean)	Silt (%)	smooth	NA	NA	0.156505	0.150547	0.484282	6
PN baseline 0-30 cm	Conventional-Regenerative Classification	0.42263	s(Ca_sat_0_15cm_mean)	Ca saturation 0-15 cm	smooth	NA	NA	0.660376	0.0266428	0.798481	6
PN baseline 0-60 cm	Grazing (Y/N)	0.123228	(Intercept)	Intercept	parametric	0.885895	0.0672507	13.173	1.32043e-16	NA	NA
PN baseline 0-60 cm	Grazing (Y/N)	0.123228	Grazing_Y_NNG	Effect of No Grazing (vs Grazing)	parametric	0.0142953	0.098588	0.145	0.885396	NA	NA
PN baseline 0-60 cm	Grazing (Y/N)	0.123228	s(clay_farm_mean_mean)	Clay (%)	smooth	NA	NA	3.66434e-07	0.759598	1.098e-05	6
PN baseline 0-60 cm	Grazing (Y/N)	0.123228	s(Longitude_mean,Latitude_mean)	Spatial (longitude x latitude)	smooth	NA	NA	0.28784	0.0233273	2.18518	24
PN baseline 0-60 cm	Grazing (Y/N)	0.123228	s(silt_farm_mean_mean)	Silt (%)	smooth	NA	NA	3.93338e-07	0.638147	7.20971e-06	6
PN baseline 0-60 cm	Grazing (Y/N)	0.123228	s(Ca_sat_0_15cm_mean)	Ca saturation 0-15 cm	smooth	NA	NA	0.0679646	0.229815	0.289678	6
PN baseline 0-60 cm	Conventional-Regenerative Classification	0.1845	(Intercept)	Intercept	parametric	0.996541	0.0825809	12.0674	4.52623e-15	NA	NA
PN baseline 0-60 cm	Conventional-Regenerative Classification	0.1845	Score.Result_using_winter_cover_cropsRegenerative	Effect of management classification	parametric	-0.188836	0.1102	-1.71357	0.0941649	NA	NA
PN baseline 0-60 cm	Conventional-Regenerative Classification	0.1845	Score.Result_using_winter_cover_cropsTransition	Effect of management classification	parametric	-0.0589597	0.164627	-0.358141	0.722077	NA	NA
PN baseline 0-60 cm	Conventional-Regenerative Classification	0.1845	s(clay_farm_mean_mean)	Clay (%)	smooth	NA	NA	1.27555e-07	0.835239	5.20214e-06	6
PN baseline 0-60 cm	Conventional-Regenerative Classification	0.1845	s(Longitude_mean,Latitude_mean)	Spatial (longitude x latitude)	smooth	NA	NA	0.42514	0.00707647	2.52371	24
PN baseline 0-60 cm	Conventional-Regenerative Classification	0.1845	s(silt_farm_mean_mean)	Silt (%)	smooth	NA	NA	1.33041e-06	0.53657	2.1768e-05	6
PN baseline 0-60 cm	Conventional-Regenerative Classification	0.1845	s(Ca_sat_0_15cm_mean)	Ca saturation 0-15 cm	smooth	NA	NA	0.169144	0.15292	0.503694	6
PN baseline 30-60 cm	Grazing (Y/N)	0.123227	(Intercept)	Intercept	parametric	0.442948	0.0336254	13.173	1.32042e-16	NA	NA
PN baseline 30-60 cm	Grazing (Y/N)	0.123227	Grazing_Y_NNG	Effect of No Grazing (vs Grazing)	parametric	0.00714761	0.049294	0.145	0.885396	NA	NA
PN baseline 30-60 cm	Grazing (Y/N)	0.123227	s(clay_farm_mean_mean)	Clay (%)	smooth	NA	NA	1.34801e-07	0.7596	4.03929e-06	6
PN baseline 30-60 cm	Grazing (Y/N)	0.123227	s(Longitude_mean,Latitude_mean)	Spatial (longitude x latitude)	smooth	NA	NA	0.287841	0.0233274	2.18518	24
PN baseline 30-60 cm	Grazing (Y/N)	0.123227	s(silt_farm_mean_mean)	Silt (%)	smooth	NA	NA	1.44702e-07	0.638146	2.65231e-06	6
PN baseline 30-60 cm	Grazing (Y/N)	0.123227	s(Ca_sat_0_15cm_mean)	Ca saturation 0-15 cm	smooth	NA	NA	0.0679614	0.229814	0.28966	6
PN baseline 30-60 cm	Conventional-Regenerative Classification	0.1845	(Intercept)	Intercept	parametric	0.49827	0.0412905	12.0674	4.52616e-15	NA	NA
PN baseline 30-60 cm	Conventional-Regenerative Classification	0.1845	Score.Result_using_winter_cover_cropsRegenerative	Effect of management classification	parametric	-0.0944181	0.0551001	-1.71357	0.0941647	NA	NA
PN baseline 30-60 cm	Conventional-Regenerative Classification	0.1845	Score.Result_using_winter_cover_cropsTransition	Effect of management classification	parametric	-0.02948	0.0823136	-0.358142	0.722076	NA	NA
PN baseline 30-60 cm	Conventional-Regenerative Classification	0.1845	s(clay_farm_mean_mean)	Clay (%)	smooth	NA	NA	4.69248e-08	0.835239	1.91376e-06	6
PN baseline 30-60 cm	Conventional-Regenerative Classification	0.1845	s(Longitude_mean,Latitude_mean)	Spatial (longitude x latitude)	smooth	NA	NA	0.425141	0.00707653	2.52371	24
PN baseline 30-60 cm	Conventional-Regenerative Classification	0.1845	s(silt_farm_mean_mean)	Silt (%)	smooth	NA	NA	4.89435e-07	0.53657	8.00804e-06	6
PN baseline 30-60 cm	Conventional-Regenerative Classification	0.1845	s(Ca_sat_0_15cm_mean)	Ca saturation 0-15 cm	smooth	NA	NA	0.169144	0.15292	0.503691	6
PN stock 0-15 cm	Grazing (Y/N)	0.211595	(Intercept)	Intercept	parametric	1.04623	0.0900885	11.6134	6.40777e-15	NA	NA
PN stock 0-15 cm	Grazing (Y/N)	0.211595	Grazing_Y_NNG	Effect of No Grazing (vs Grazing)	parametric	-0.331423	0.132015	-2.5105	0.0158496	NA	NA
PN stock 0-15 cm	Grazing (Y/N)	0.211595	s(clay_farm_mean_mean)	Clay (%)	smooth	NA	NA	2.04862e-06	0.495361	2.21156e-05	6
PN stock 0-15 cm	Grazing (Y/N)	0.211595	s(Longitude_mean,Latitude_mean)	Spatial (longitude x latitude)	smooth	NA	NA	0.0776722	0.103766	0.780539	24
PN stock 0-15 cm	Grazing (Y/N)	0.211595	s(silt_farm_mean_mean)	Silt (%)	smooth	NA	NA	0.399532	0.0663556	0.705643	6
PN stock 0-15 cm	Grazing (Y/N)	0.211595	s(Ca_sat_0_15cm_mean)	Ca saturation 0-15 cm	smooth	NA	NA	2.84825e-07	0.745059	8.78156e-06	6
PN stock 0-15 cm	Conventional-Regenerative Classification	0.207622	(Intercept)	Intercept	parametric	0.771575	0.110634	6.97416	1.37266e-08	NA	NA
PN stock 0-15 cm	Conventional-Regenerative Classification	0.207622	Score.Result_using_winter_cover_cropsRegenerative	Effect of management classification	parametric	0.29418	0.145114	2.02723	0.0488399	NA	NA
PN stock 0-15 cm	Conventional-Regenerative Classification	0.207622	Score.Result_using_winter_cover_cropsTransition	Effect of management classification	parametric	-0.240452	0.216443	-1.11092	0.27275	NA	NA
PN stock 0-15 cm	Conventional-Regenerative Classification	0.207622	s(clay_farm_mean_mean)	Clay (%)	smooth	NA	NA	9.63618e-06	0.380583	6.6406e-05	6
PN stock 0-15 cm	Conventional-Regenerative Classification	0.207622	s(Longitude_mean,Latitude_mean)	Spatial (longitude x latitude)	smooth	NA	NA	4.99762e-05	0.325203	0.00120237	24
PN stock 0-15 cm	Conventional-Regenerative Classification	0.207622	s(silt_farm_mean_mean)	Silt (%)	smooth	NA	NA	0.744373	0.0240945	0.817077	6
PN stock 0-15 cm	Conventional-Regenerative Classification	0.207622	s(Ca_sat_0_15cm_mean)	Ca saturation 0-15 cm	smooth	NA	NA	1.09805e-07	0.909309	8.44926e-06	6
PN stock 15-30 cm	Grazing (Y/N)	0.424508	(Intercept)	Intercept	parametric	0.317253	0.0196907	16.1118	1.04992e-18	NA	NA
PN stock 15-30 cm	Grazing (Y/N)	0.424508	Grazing_Y_NNG	Effect of No Grazing (vs Grazing)	parametric	-0.022353	0.0290552	-0.769328	0.446392	NA	NA
PN stock 15-30 cm	Grazing (Y/N)	0.424508	s(clay_farm_mean_mean)	Clay (%)	smooth	NA	NA	0.245997	0.114411	0.806992	6
PN stock 15-30 cm	Grazing (Y/N)	0.424508	s(Longitude_mean,Latitude_mean)	Spatial (longitude x latitude)	smooth	NA	NA	0.836896	0.000604296	4.22332	24
PN stock 15-30 cm	Grazing (Y/N)	0.424508	s(silt_farm_mean_mean)	Silt (%)	smooth	NA	NA	0.344995	0.0714679	0.674279	6
PN stock 15-30 cm	Grazing (Y/N)	0.424508	s(Ca_sat_0_15cm_mean)	Ca saturation 0-15 cm	smooth	NA	NA	0.610132	0.0304528	0.785446	6
PN stock 15-30 cm	Conventional-Regenerative Classification	0.418785	(Intercept)	Intercept	parametric	0.338625	0.0262905	12.8801	1.94368e-15	NA	NA
PN stock 15-30 cm	Conventional-Regenerative Classification	0.418785	Score.Result_using_winter_cover_cropsRegenerative	Effect of management classification	parametric	-0.0485323	0.0354221	-1.37011	0.178692	NA	NA
PN stock 15-30 cm	Conventional-Regenerative Classification	0.418785	Score.Result_using_winter_cover_cropsTransition	Effect of management classification	parametric	-0.0552403	0.0533642	-1.03516	0.307139	NA	NA
PN stock 15-30 cm	Conventional-Regenerative Classification	0.418785	s(clay_farm_mean_mean)	Clay (%)	smooth	NA	NA	0.16571	0.150083	0.61896	6
PN stock 15-30 cm	Conventional-Regenerative Classification	0.418785	s(Longitude_mean,Latitude_mean)	Spatial (longitude x latitude)	smooth	NA	NA	0.853023	0.000468523	4.03777	24
PN stock 15-30 cm	Conventional-Regenerative Classification	0.418785	s(silt_farm_mean_mean)	Silt (%)	smooth	NA	NA	0.184323	0.132555	0.525155	6
PN stock 15-30 cm	Conventional-Regenerative Classification	0.418785	s(Ca_sat_0_15cm_mean)	Ca saturation 0-15 cm	smooth	NA	NA	0.750331	0.0196454	0.818275	6
PN stock 0-30 cm	Grazing (Y/N)	0.293228	(Intercept)	Intercept	parametric	1.3627	0.0869586	15.6706	3.40657e-19	NA	NA
PN stock 0-30 cm	Grazing (Y/N)	0.293228	Grazing_Y_NNG	Effect of No Grazing (vs Grazing)	parametric	-0.352088	0.127538	-2.76065	0.00850285	NA	NA
PN stock 0-30 cm	Grazing (Y/N)	0.293228	s(clay_farm_mean_mean)	Clay (%)	smooth	NA	NA	1.05557e-06	0.717645	2.40236e-05	6
PN stock 0-30 cm	Grazing (Y/N)	0.293228	s(Longitude_mean,Latitude_mean)	Spatial (longitude x latitude)	smooth	NA	NA	0.309321	0.0186543	2.27666	24
PN stock 0-30 cm	Grazing (Y/N)	0.293228	s(silt_farm_mean_mean)	Silt (%)	smooth	NA	NA	0.197833	0.131513	0.542754	6
PN stock 0-30 cm	Grazing (Y/N)	0.293228	s(Ca_sat_0_15cm_mean)	Ca saturation 0-15 cm	smooth	NA	NA	2.33777e-09	0.998937	1.97103e-06	6
PN stock 0-30 cm	Conventional-Regenerative Classification	0.501106	(Intercept)	Intercept	parametric	1.07198	0.102323	10.4764	2.10025e-12	NA	NA
PN stock 0-30 cm	Conventional-Regenerative Classification	0.501106	Score.Result_using_winter_cover_cropsRegenerative	Effect of management classification	parametric	0.289371	0.139314	2.07712	0.0450919	NA	NA
PN stock 0-30 cm	Conventional-Regenerative Classification	0.501106	Score.Result_using_winter_cover_cropsTransition	Effect of management classification	parametric	-0.171159	0.216928	-0.789013	0.435345	NA	NA
PN stock 0-30 cm	Conventional-Regenerative Classification	0.501106	s(clay_farm_mean_mean)	Clay (%)	smooth	NA	NA	0.000128433	0.296452	0.000778869	6
PN stock 0-30 cm	Conventional-Regenerative Classification	0.501106	s(Longitude_mean,Latitude_mean)	Spatial (longitude x latitude)	smooth	NA	NA	1.24489	0.00168299	8.28269	24
PN stock 0-30 cm	Conventional-Regenerative Classification	0.501106	s(silt_farm_mean_mean)	Silt (%)	smooth	NA	NA	0.0510164	0.218093	0.234366	6
PN stock 0-30 cm	Conventional-Regenerative Classification	0.501106	s(Ca_sat_0_15cm_mean)	Ca saturation 0-15 cm	smooth	NA	NA	1.09451e-07	0.864492	6.85464e-06	6
PN stock 30-60 cm	Grazing (Y/N)	0.259279	(Intercept)	Intercept	parametric	0.473064	0.0310344	15.2432	1.96558e-18	NA	NA
PN stock 30-60 cm	Grazing (Y/N)	0.259279	Grazing_Y_NNG	Effect of No Grazing (vs Grazing)	parametric	0.00717806	0.0456119	0.157372	0.875728	NA	NA
PN stock 30-60 cm	Grazing (Y/N)	0.259279	s(clay_farm_mean_mean)	Clay (%)	smooth	NA	NA	8.10141e-07	0.4675	8.52632e-06	6
PN stock 30-60 cm	Grazing (Y/N)	0.259279	s(Longitude_mean,Latitude_mean)	Spatial (longitude x latitude)	smooth	NA	NA	0.654732	0.00164832	3.35275	24
PN stock 30-60 cm	Grazing (Y/N)	0.259279	s(silt_farm_mean_mean)	Silt (%)	smooth	NA	NA	0.0895274	0.201346	0.349461	6
PN stock 30-60 cm	Grazing (Y/N)	0.259279	s(Ca_sat_0_15cm_mean)	Ca saturation 0-15 cm	smooth	NA	NA	0.201393	0.130866	0.547184	6
PN stock 30-60 cm	Conventional-Regenerative Classification	0.327659	(Intercept)	Intercept	parametric	0.540935	0.0385424	14.0348	5.65597e-17	NA	NA
PN stock 30-60 cm	Conventional-Regenerative Classification	0.327659	Score.Result_using_winter_cover_cropsRegenerative	Effect of management classification	parametric	-0.112733	0.0517235	-2.17954	0.0352886	NA	NA
PN stock 30-60 cm	Conventional-Regenerative Classification	0.327659	Score.Result_using_winter_cover_cropsTransition	Effect of management classification	parametric	-0.0544037	0.0775269	-0.701739	0.486938	NA	NA
PN stock 30-60 cm	Conventional-Regenerative Classification	0.327659	s(clay_farm_mean_mean)	Clay (%)	smooth	NA	NA	1.278e-07	0.623241	2.21662e-06	6
PN stock 30-60 cm	Conventional-Regenerative Classification	0.327659	s(Longitude_mean,Latitude_mean)	Spatial (longitude x latitude)	smooth	NA	NA	0.845119	0.000385649	3.4757	24
PN stock 30-60 cm	Conventional-Regenerative Classification	0.327659	s(silt_farm_mean_mean)	Silt (%)	smooth	NA	NA	0.0286311	0.262005	0.146605	6
PN stock 30-60 cm	Conventional-Regenerative Classification	0.327659	s(Ca_sat_0_15cm_mean)	Ca saturation 0-15 cm	smooth	NA	NA	0.39911	0.0645982	0.705428	6
PN stock 0-60 cm	Grazing (Y/N)	0.597339	(Intercept)	Intercept	parametric	1.7958	0.0785694	22.8562	8.36986e-23	NA	NA
PN stock 0-60 cm	Grazing (Y/N)	0.597339	Grazing_Y_NNG	Effect of No Grazing (vs Grazing)	parametric	-0.259528	0.118551	-2.18916	0.0352559	NA	NA
PN stock 0-60 cm	Grazing (Y/N)	0.597339	s(clay_farm_mean_mean)	Clay (%)	smooth	NA	NA	6.02338e-06	0.381461	4.62194e-05	6
PN stock 0-60 cm	Grazing (Y/N)	0.597339	s(Longitude_mean,Latitude_mean)	Spatial (longitude x latitude)	smooth	NA	NA	2.34742	1.8386e-05	9.55067	24
PN stock 0-60 cm	Grazing (Y/N)	0.597339	s(silt_farm_mean_mean)	Silt (%)	smooth	NA	NA	5.31408e-08	0.945748	4.84122e-06	6
PN stock 0-60 cm	Grazing (Y/N)	0.597339	s(Ca_sat_0_15cm_mean)	Ca saturation 0-15 cm	smooth	NA	NA	3.36984e-06	0.426668	3.01912e-05	6
PN stock 0-60 cm	Conventional-Regenerative Classification	0.608046	(Intercept)	Intercept	parametric	1.59046	0.107153	14.8429	2.57715e-16	NA	NA
PN stock 0-60 cm	Conventional-Regenerative Classification	0.608046	Score.Result_using_winter_cover_cropsRegenerative	Effect of management classification	parametric	0.205244	0.146501	1.40098	0.170392	NA	NA
PN stock 0-60 cm	Conventional-Regenerative Classification	0.608046	Score.Result_using_winter_cover_cropsTransition	Effect of management classification	parametric	-0.164109	0.230683	-0.711405	0.481745	NA	NA
PN stock 0-60 cm	Conventional-Regenerative Classification	0.608046	s(clay_farm_mean_mean)	Clay (%)	smooth	NA	NA	0.0539725	0.216016	0.244636	6
PN stock 0-60 cm	Conventional-Regenerative Classification	0.608046	s(Longitude_mean,Latitude_mean)	Spatial (longitude x latitude)	smooth	NA	NA	2.46563	1.23132e-05	9.99525	24
PN stock 0-60 cm	Conventional-Regenerative Classification	0.608046	s(silt_farm_mean_mean)	Silt (%)	smooth	NA	NA	3.14594e-07	0.779668	9.75807e-06	6
PN stock 0-60 cm	Conventional-Regenerative Classification	0.608046	s(Ca_sat_0_15cm_mean)	Ca saturation 0-15 cm	smooth	NA	NA	0.0343772	0.254157	0.171004	6
PN RZE 0-15 cm	Grazing (Y/N)	0.192265	(Intercept)	Intercept	parametric	0.776289	0.0925403	8.38865	1.21319e-10	NA	NA
PN RZE 0-15 cm	Grazing (Y/N)	0.192265	Grazing_Y_NNG	Effect of No Grazing (vs Grazing)	parametric	-0.320993	0.135605	-2.36713	0.0224362	NA	NA
PN RZE 0-15 cm	Grazing (Y/N)	0.192265	s(clay_farm_mean_mean)	Clay (%)	smooth	NA	NA	0.115838	0.224518	0.474008	6
PN RZE 0-15 cm	Grazing (Y/N)	0.192265	s(Longitude_mean,Latitude_mean)	Spatial (longitude x latitude)	smooth	NA	NA	0.00574764	0.337315	0.130533	24
PN RZE 0-15 cm	Grazing (Y/N)	0.192265	s(silt_farm_mean_mean)	Silt (%)	smooth	NA	NA	0.79515	0.0186074	0.826721	6
PN RZE 0-15 cm	Grazing (Y/N)	0.192265	s(Ca_sat_0_15cm_mean)	Ca saturation 0-15 cm	smooth	NA	NA	1.08466e-06	0.774544	2.79442e-05	6
PN RZE 0-15 cm	Conventional-Regenerative Classification	0.238502	(Intercept)	Intercept	parametric	0.480853	0.111682	4.30555	9.65927e-05	NA	NA
PN RZE 0-15 cm	Conventional-Regenerative Classification	0.238502	Score.Result_using_winter_cover_cropsRegenerative	Effect of management classification	parametric	0.332366	0.147518	2.25305	0.0294904	NA	NA
PN RZE 0-15 cm	Conventional-Regenerative Classification	0.238502	Score.Result_using_winter_cover_cropsTransition	Effect of management classification	parametric	-0.192197	0.217085	-0.885353	0.380963	NA	NA
PN RZE 0-15 cm	Conventional-Regenerative Classification	0.238502	s(clay_farm_mean_mean)	Clay (%)	smooth	NA	NA	0.259743	0.141487	0.780977	6
PN RZE 0-15 cm	Conventional-Regenerative Classification	0.238502	s(Longitude_mean,Latitude_mean)	Spatial (longitude x latitude)	smooth	NA	NA	2.52905e-07	0.740052	1.91333e-05	24
PN RZE 0-15 cm	Conventional-Regenerative Classification	0.238502	s(silt_farm_mean_mean)	Silt (%)	smooth	NA	NA	0.919192	0.0133588	0.846519	6
PN RZE 0-15 cm	Conventional-Regenerative Classification	0.238502	s(Ca_sat_0_15cm_mean)	Ca saturation 0-15 cm	smooth	NA	NA	7.39055e-08	0.674197	1.33915e-06	6
PN RZE 15-30 cm	Grazing (Y/N)	0.260922	(Intercept)	Intercept	parametric	0.0507635	0.00680456	7.46022	2.80871e-09	NA	NA
PN RZE 15-30 cm	Grazing (Y/N)	0.260922	Grazing_Y_NNG	Effect of No Grazing (vs Grazing)	parametric	-0.0193043	0.00996944	-1.93635	0.0594219	NA	NA
PN RZE 15-30 cm	Grazing (Y/N)	0.260922	s(clay_farm_mean_mean)	Clay (%)	smooth	NA	NA	2.16765	0.000466248	0.928604	6
PN RZE 15-30 cm	Grazing (Y/N)	0.260922	s(Longitude_mean,Latitude_mean)	Spatial (longitude x latitude)	smooth	NA	NA	1.04849e-06	0.513426	3.53655e-05	24
PN RZE 15-30 cm	Grazing (Y/N)	0.260922	s(silt_farm_mean_mean)	Silt (%)	smooth	NA	NA	0.508932	0.0496376	0.753348	6
PN RZE 15-30 cm	Grazing (Y/N)	0.260922	s(Ca_sat_0_15cm_mean)	Ca saturation 0-15 cm	smooth	NA	NA	0.094531	0.217007	0.361925	6
PN RZE 15-30 cm	Conventional-Regenerative Classification	0.232674	(Intercept)	Intercept	parametric	0.0384405	0.0085291	4.50698	5.18687e-05	NA	NA
PN RZE 15-30 cm	Conventional-Regenerative Classification	0.232674	Score.Result_using_winter_cover_cropsRegenerative	Effect of management classification	parametric	0.0105576	0.0112081	0.941957	0.351603	NA	NA
PN RZE 15-30 cm	Conventional-Regenerative Classification	0.232674	Score.Result_using_winter_cover_cropsTransition	Effect of management classification	parametric	-0.0164825	0.0166651	-0.989041	0.328309	NA	NA
PN RZE 15-30 cm	Conventional-Regenerative Classification	0.232674	s(clay_farm_mean_mean)	Clay (%)	smooth	NA	NA	1.91858	0.000869771	0.920077	6
PN RZE 15-30 cm	Conventional-Regenerative Classification	0.232674	s(Longitude_mean,Latitude_mean)	Spatial (longitude x latitude)	smooth	NA	NA	9.68608e-08	0.832282	8.24495e-06	24
PN RZE 15-30 cm	Conventional-Regenerative Classification	0.232674	s(silt_farm_mean_mean)	Silt (%)	smooth	NA	NA	0.36664	0.0798396	0.687707	6
PN RZE 15-30 cm	Conventional-Regenerative Classification	0.232674	s(Ca_sat_0_15cm_mean)	Ca saturation 0-15 cm	smooth	NA	NA	0.112372	0.202244	0.402712	6
PN RZE 0-30 cm	Grazing (Y/N)	0.204919	(Intercept)	Intercept	parametric	0.827061	0.0895635	9.23435	7.90452e-12	NA	NA
PN RZE 0-30 cm	Grazing (Y/N)	0.204919	Grazing_Y_NNG	Effect of No Grazing (vs Grazing)	parametric	-0.340316	0.131209	-2.59369	0.0128737	NA	NA
PN RZE 0-30 cm	Grazing (Y/N)	0.204919	s(clay_farm_mean_mean)	Clay (%)	smooth	NA	NA	0.0258719	0.304062	0.139897	6
PN RZE 0-30 cm	Grazing (Y/N)	0.204919	s(Longitude_mean,Latitude_mean)	Spatial (longitude x latitude)	smooth	NA	NA	0.0190627	0.301667	0.388082	24
PN RZE 0-30 cm	Grazing (Y/N)	0.204919	s(silt_farm_mean_mean)	Silt (%)	smooth	NA	NA	0.703916	0.0242718	0.808558	6
PN RZE 0-30 cm	Grazing (Y/N)	0.204919	s(Ca_sat_0_15cm_mean)	Ca saturation 0-15 cm	smooth	NA	NA	1.05432e-06	0.798464	3.14639e-05	6
PN RZE 0-30 cm	Conventional-Regenerative Classification	0.250212	(Intercept)	Intercept	parametric	0.519858	0.107581	4.83226	1.78114e-05	NA	NA
PN RZE 0-30 cm	Conventional-Regenerative Classification	0.250212	Score.Result_using_winter_cover_cropsRegenerative	Effect of management classification	parametric	0.341889	0.141759	2.41176	0.0202588	NA	NA
PN RZE 0-30 cm	Conventional-Regenerative Classification	0.250212	Score.Result_using_winter_cover_cropsTransition	Effect of management classification	parametric	-0.208961	0.209579	-0.997052	0.324368	NA	NA
PN RZE 0-30 cm	Conventional-Regenerative Classification	0.250212	s(clay_farm_mean_mean)	Clay (%)	smooth	NA	NA	0.145716	0.205202	0.552372	6
PN RZE 0-30 cm	Conventional-Regenerative Classification	0.250212	s(Longitude_mean,Latitude_mean)	Spatial (longitude x latitude)	smooth	NA	NA	4.71256e-08	0.699682	2.6456e-06	24
PN RZE 0-30 cm	Conventional-Regenerative Classification	0.250212	s(silt_farm_mean_mean)	Silt (%)	smooth	NA	NA	0.861228	0.0159019	0.837855	6
PN RZE 0-30 cm	Conventional-Regenerative Classification	0.250212	s(Ca_sat_0_15cm_mean)	Ca saturation 0-15 cm	smooth	NA	NA	6.08546e-08	0.691489	1.27507e-06	6
PN RZE 30-60 cm	Grazing (Y/N)	0.0500827	(Intercept)	Intercept	parametric	0.0323188	0.0111376	2.90177	0.00577513	NA	NA
PN RZE 30-60 cm	Grazing (Y/N)	0.0500827	Grazing_Y_NNG	Effect of No Grazing (vs Grazing)	parametric	-0.00467397	0.0162877	-0.286964	0.775487	NA	NA
PN RZE 30-60 cm	Grazing (Y/N)	0.0500827	s(clay_farm_mean_mean)	Clay (%)	smooth	NA	NA	0.545582	0.0428608	0.765994	6
PN RZE 30-60 cm	Grazing (Y/N)	0.0500827	s(Longitude_mean,Latitude_mean)	Spatial (longitude x latitude)	smooth	NA	NA	1.61497e-06	0.503268	5.28104e-05	24
PN RZE 30-60 cm	Grazing (Y/N)	0.0500827	s(silt_farm_mean_mean)	Silt (%)	smooth	NA	NA	0.0444149	0.262204	0.210562	6
PN RZE 30-60 cm	Grazing (Y/N)	0.0500827	s(Ca_sat_0_15cm_mean)	Ca saturation 0-15 cm	smooth	NA	NA	5.43543e-07	0.766213	1.7637e-05	6
PN RZE 30-60 cm	Conventional-Regenerative Classification	0.0521519	(Intercept)	Intercept	parametric	0.0401675	0.0138539	2.89936	0.00587402	NA	NA
PN RZE 30-60 cm	Conventional-Regenerative Classification	0.0521519	Score.Result_using_winter_cover_cropsRegenerative	Effect of management classification	parametric	-0.0120795	0.0183401	-0.658642	0.513648	NA	NA
PN RZE 30-60 cm	Conventional-Regenerative Classification	0.0521519	Score.Result_using_winter_cover_cropsTransition	Effect of management classification	parametric	-0.030301	0.0268082	-1.13029	0.264638	NA	NA
PN RZE 30-60 cm	Conventional-Regenerative Classification	0.0521519	s(clay_farm_mean_mean)	Clay (%)	smooth	NA	NA	0.581746	0.0526685	1.12413	6
PN RZE 30-60 cm	Conventional-Regenerative Classification	0.0521519	s(Longitude_mean,Latitude_mean)	Spatial (longitude x latitude)	smooth	NA	NA	2.07e-06	0.525532	7.31804e-05	24
PN RZE 30-60 cm	Conventional-Regenerative Classification	0.0521519	s(silt_farm_mean_mean)	Silt (%)	smooth	NA	NA	1.15066e-06	0.398349	8.6876e-06	6
PN RZE 30-60 cm	Conventional-Regenerative Classification	0.0521519	s(Ca_sat_0_15cm_mean)	Ca saturation 0-15 cm	smooth	NA	NA	4.98015e-07	0.666982	1.00824e-05	6
PN RZE 0-60 cm	Grazing (Y/N)	0.218202	(Intercept)	Intercept	parametric	0.859044	0.0868769	9.88806	1.07335e-12	NA	NA
PN RZE 0-60 cm	Grazing (Y/N)	0.218202	Grazing_Y_NNG	Effect of No Grazing (vs Grazing)	parametric	-0.344273	0.127282	-2.70481	0.00971913	NA	NA
PN RZE 0-60 cm	Grazing (Y/N)	0.218202	s(clay_farm_mean_mean)	Clay (%)	smooth	NA	NA	3.40844e-06	0.450031	3.09059e-05	6
PN RZE 0-60 cm	Grazing (Y/N)	0.218202	s(Longitude_mean,Latitude_mean)	Spatial (longitude x latitude)	smooth	NA	NA	0.0417984	0.24033	0.723626	24
PN RZE 0-60 cm	Grazing (Y/N)	0.218202	s(silt_farm_mean_mean)	Silt (%)	smooth	NA	NA	0.626145	0.0301358	0.789793	6
PN RZE 0-60 cm	Grazing (Y/N)	0.218202	s(Ca_sat_0_15cm_mean)	Ca saturation 0-15 cm	smooth	NA	NA	2.68326e-07	0.777053	9.20345e-06	6
PN RZE 0-60 cm	Conventional-Regenerative Classification	0.24741	(Intercept)	Intercept	parametric	0.559002	0.104609	5.34373	3.24906e-06	NA	NA
PN RZE 0-60 cm	Conventional-Regenerative Classification	0.24741	Score.Result_using_winter_cover_cropsRegenerative	Effect of management classification	parametric	0.330867	0.137325	2.40937	0.0203275	NA	NA
PN RZE 0-60 cm	Conventional-Regenerative Classification	0.24741	Score.Result_using_winter_cover_cropsTransition	Effect of management classification	parametric	-0.235473	0.204497	-1.15147	0.255892	NA	NA
PN RZE 0-60 cm	Conventional-Regenerative Classification	0.24741	s(clay_farm_mean_mean)	Clay (%)	smooth	NA	NA	0.0210079	0.318508	0.115583	6
PN RZE 0-60 cm	Conventional-Regenerative Classification	0.24741	s(Longitude_mean,Latitude_mean)	Spatial (longitude x latitude)	smooth	NA	NA	3.03609e-07	0.625326	1.29815e-05	24
PN RZE 0-60 cm	Conventional-Regenerative Classification	0.24741	s(silt_farm_mean_mean)	Silt (%)	smooth	NA	NA	0.76641	0.0221248	0.821388	6
PN RZE 0-60 cm	Conventional-Regenerative Classification	0.24741	s(Ca_sat_0_15cm_mean)	Ca saturation 0-15 cm	smooth	NA	NA	3.42455e-08	0.762982	9.38703e-07	6
