# Supplementary material
Source: Research Square preprint supplement (doi:10.21203/rs.3.rs-9350796/v1)
Supplement: Supplementary file 3 [file 792cb6f43ec05e7a81a07e23.pdf]

## Grazing in Vineyards Management Survey - UC Davis & Ecdysis Foundation

### Implied Consent to Participate in Research

Data collected from this confidential survey will be used for completion of a PhD at UC Davis.

The information gathered will be used for research on Vineyard Management Practices. The survey questions will be about vineyard management practices and operating costs/revenues. You have been invited to participate because your vineyard was a part of the biological and soil sampling aspect of this study. You must be 18 years of age or older to participate. There are no risks or benefits to you in participating in this survey. You may choose to participate or not. You may answer only the questions you feel comfortable answering, and you may stop at any time. If you do not wish to participate, you may simply return the blank survey, with no penalty to yourself. If you do participate, completion and return of the survey indicates your consent to the above conditions. The survey should take approximately 40 minutes to complete. If you have any questions during the survey please feel

free to reach out to Tommy Fenster,  
tlfenster@ucdavis.edu

Contact Information (optional)

First name

Last name

\* Please provide the name of the vineyard and if applicable the name of the block studied.

\* What year was the vineyard/block in the study planted?

\* How long has this vineyard/block been under this management system?

*(number of years)*

How many total acres is your farm?

How many of the total acres do you lease to farm?

How many acres was the block we sampled?

---

---

How many vines per acre are in the block that is a part of the study?

---

---

What is the row and vine spacing of the block that is a part of the study?

**Please indicate units.**

---

---

What is the grape scion variety(s) in the vineyard/block being studied?

---

---

What is the rootstock variety (s) of the vineyard/block being studied?

---

---

How is the vineyard/block trellised and trained?

For example Geneva Double Curtain, VSP spur trained, High wire cordon, etc.

---

---

What was your yield for the block being studied?

Please **indicate the units** and if you are referring to per vine, per acre, or total block yield.

---

---

What was the crop yield to winter pruning weight ratio for the vineyard/block in the study?

---

---

What was your average yield over the last 5 years from the vineyard/block under study?

Please **indicate the units** if you are referring to per vine, per acre, or total block yield.

---

---

Did you deal with any vineyards pests and diseases for the block in the study? If so please list and indicate if the pressure was low, medium or high.

|                 | Name of Pest/Disease | Intensity of pest pressure<br>(low, medium, high) |
|-----------------|----------------------|---------------------------------------------------|
| Pest/Disease 1  |                      |                                                   |
| Pest/ Disease 2 |                      |                                                   |
| Pest/Disease 3  |                      |                                                   |
| Pest/Disease 4  |                      |                                                   |
| Pest/Disease 5  |                      |                                                   |
| Pest/ Disease 6 |                      |                                                   |
| Pest/Disease 7  |                      |                                                   |
| Pest/Disease 8  |                      |                                                   |
| Pest/Disease 9  |                      |                                                   |
| Pest/Disease 10 |                      |                                                   |

How do you sell your grapes? (Check all that apply)

- Wholesale to wineries
- Make into your own wine which is then sold directly to consumers

Make into your own wine which is then sold in the wholesale market

Other

---

Is this vineyard/block certified organic?

Yes

No

Organically managed but not certified

Transitioning to organic

Which organization certified your vineyard/block?

---

---

How long has your vineyard/block been certified organic?

*(number of years)*

---

---

Select the type of ground cover in in your vineyard.

Mark all that apply

|                                                                    | Naturally occurring<br>vegetation | Cover crop mix           | Try to maintain bare ground |
|--------------------------------------------------------------------|-----------------------------------|--------------------------|-----------------------------|
| Tractor row ground cover during<br>the winter dormant season       | <input type="checkbox"/>          | <input type="checkbox"/> | <input type="checkbox"/>    |
| Tractor row ground cover during<br>the growing season              | <input type="checkbox"/>          | <input type="checkbox"/> | <input type="checkbox"/>    |
| Under the vine ground cover<br>during the winter dormant<br>season | <input type="checkbox"/>          | <input type="checkbox"/> | <input type="checkbox"/>    |
| Under the vine ground cover<br>during the growing season           | <input type="checkbox"/>          | <input type="checkbox"/> | <input type="checkbox"/>    |

---

\* How do you manage the ground cover in the **tractor row** of your vineyard?

Mark all the apply

- Mowing
- Grazers
- Herbicides
- Tillage
- Flaming
- Other

How often do you till the tractor row of the vineyard we sampled?

- More than 1x per year
- Every year
- Every two years
- Every three years
- Every four years
- Every five years or more

In the tractor row do you till every row or every other row?

- Every row
- every other row

---

Please complete the following table regarding tractor row tillage

|                     | Number of tillage events from post-harvest to harvest (1 year) | Per acre labor hours for each tillage event | Number of years under vine tillage has been practice | approximate tillage depth |
|---------------------|----------------------------------------------------------------|---------------------------------------------|------------------------------------------------------|---------------------------|
| Tractor row tillage |                                                                |                                             |                                                      |                           |

\* How do you manage the ground cover **under the vines** of your vineyard?

Mark all the apply

- Mowing
- Grazers
- Herbicides
- Tillage
- Flaming
- Other

How often do you till **under the vine**?

- More than 1x per year
- Every year
- Every two years
- Every three years
- Every four years
- Every five years or more

Please complete the following table regarding under vine tillage

|                    | Number of tillage events from post-harvest to harvest (1 year) | Per acre labor hours for each tillage event | Number of years under vine tillage has been practice | approximate tillage depth |
|--------------------|----------------------------------------------------------------|---------------------------------------------|------------------------------------------------------|---------------------------|
| Under vine tillage |                                                                |                                             |                                                      |                           |

Are there any strips of managed perennial vegetation (*pollinator strips, shelterbelts, etc.*) on the field/vineyard or on the borders of field/vineyard we sampled?

Yes

No

Please complete the cells of the table relevant to the vineyard/block in the study.

**Tip:** Take the total revenue for your entire farm and divide by the total number of acres.

|                                                      | Total <b>per acre</b> costs (including labor) | Total <b>per acre</b> revenue |
|------------------------------------------------------|-----------------------------------------------|-------------------------------|
| Vineyard operations (growing and selling the grapes) |                                               |                               |
| Winery operations (selling wine)                     |                                               |                               |
| Crop insurance                                       |                                               |                               |
| Government subsidies                                 |                                               |                               |

If you have a document detailing your management and financial records, feel free to upload here.

**You can then skip filling out this information in future questions.**

File 0 of 1

Max file size: 10.0 MB

 Press here to [Browse](#)

\* Between fall and spring, did you plant a cover crop in the field/orchard we sampled?

*(Cover crops planted during the growing season will be asked about later.)*

Yes

No

Please complete the table for as many cool season cover crops as you seeded between **fall and spring**.

*(Cover crops inter-seeded during the growing season will be asked about later.)*

|               | Species of cover crop | Seeding rate<br><i>(specify unit/acre)</i> | Cost of cover crop seed<br><i>(dollars per pound)</i> | Labor hours to plant<br><i>(per acre)</i> | Did you graze the cover crop?<br><b>Yes/No</b> | How did you terminate the cover crop?<br><i>(Example herbicide, tillage, mowing)</i> |
|---------------|-----------------------|--------------------------------------------|-------------------------------------------------------|-------------------------------------------|------------------------------------------------|--------------------------------------------------------------------------------------|
| Cover Crop 1  |                       |                                            |                                                       |                                           |                                                |                                                                                      |
| Cover Crop 2  |                       |                                            |                                                       |                                           |                                                |                                                                                      |
| Cover Crop 3  |                       |                                            |                                                       |                                           |                                                |                                                                                      |
| Cover Crop 4  |                       |                                            |                                                       |                                           |                                                |                                                                                      |
| Cover Crop 5  |                       |                                            |                                                       |                                           |                                                |                                                                                      |
| Cover Crop 6  |                       |                                            |                                                       |                                           |                                                |                                                                                      |
| Cover Crop 7  |                       |                                            |                                                       |                                           |                                                |                                                                                      |
| Cover Crop 8  |                       |                                            |                                                       |                                           |                                                |                                                                                      |
| Cover Crop 9  |                       |                                            |                                                       |                                           |                                                |                                                                                      |
| Cover Crop 10 |                       |                                            |                                                       |                                           |                                                |                                                                                      |

During the **growing season**, did you plant a warm season cover crop into the vineyard block we sampled?

Yes

No

Please complete the table for as many cover crops inter-seeded during the **growing season**.

|                           | Species of interseeded cover crop | Seeding rate (specify rate/acre) | Cost of seed (dollars per pound) | labor hours to plant (per acre) | Did you graze the interseeded crop? <b>Yes/No</b> | How did you terminate the interseeded crop? (Ex: harvested, herbicide) |
|---------------------------|-----------------------------------|----------------------------------|----------------------------------|---------------------------------|---------------------------------------------------|------------------------------------------------------------------------|
| Interseeded cover crop 1  |                                   |                                  |                                  |                                 |                                                   |                                                                        |
| Interseeded cover crop 2  |                                   |                                  |                                  |                                 |                                                   |                                                                        |
| Interseeded cover crop 3  |                                   |                                  |                                  |                                 |                                                   |                                                                        |
| Interseeded cover crop 4  |                                   |                                  |                                  |                                 |                                                   |                                                                        |
| Interseeded cover crop 5  |                                   |                                  |                                  |                                 |                                                   |                                                                        |
| Interseeded cover crop 6  |                                   |                                  |                                  |                                 |                                                   |                                                                        |
| Interseeded cover crop 7  |                                   |                                  |                                  |                                 |                                                   |                                                                        |
| Interseeded cover crop 8  |                                   |                                  |                                  |                                 |                                                   |                                                                        |
| Interseeded cover crop 9  |                                   |                                  |                                  |                                 |                                                   |                                                                        |
| Interseeded cover crop 10 |                                   |                                  |                                  |                                 |                                                   |                                                                        |

\* Did you apply fertilizers, micronutrients, gypsum and/or lime on the field/orchard we sampled?

*\* Additional manure, biologics, compost, and compost tea is covered in the next question.*

Yes

No

Please complete the table for any applied.

*\* Additional manure, biologics, compost, and compost tea is covered in the next question.*

|               | Name of fertilizer | How did you apply? (Ex: <i>foliar, fertigation, dry, knifed in, incorporated by tillage</i> ) | Application rate (specify unit/acre) | Cost per acre | Number times applied from post-harvest to harvest (1 year) | labor hours for 1 application (per acre) | Is this an organic fertilizer (OMRI)? <b>yes/no</b> |
|---------------|--------------------|-----------------------------------------------------------------------------------------------|--------------------------------------|---------------|------------------------------------------------------------|------------------------------------------|-----------------------------------------------------|
| Fertilizer 1  |                    |                                                                                               |                                      |               |                                                            |                                          |                                                     |
| Fertilizer 2  |                    |                                                                                               |                                      |               |                                                            |                                          |                                                     |
| Fertilizer 3  |                    |                                                                                               |                                      |               |                                                            |                                          |                                                     |
| Fertilizer 4  |                    |                                                                                               |                                      |               |                                                            |                                          |                                                     |
| Fertilizer 5  |                    |                                                                                               |                                      |               |                                                            |                                          |                                                     |
| Fertilizer 6  |                    |                                                                                               |                                      |               |                                                            |                                          |                                                     |
| Fertilizer 7  |                    |                                                                                               |                                      |               |                                                            |                                          |                                                     |
| Fertilizer 8  |                    |                                                                                               |                                      |               |                                                            |                                          |                                                     |
| Fertilizer 9  |                    |                                                                                               |                                      |               |                                                            |                                          |                                                     |
| Fertilizer 10 |                    |                                                                                               |                                      |               |                                                            |                                          |                                                     |

\* Did you apply additional manure or other biologicals (compost or compost tea) to your field/orchard we sampled?

Yes

No

Please complete the table for any applied.

|                             | Type of manure/biologic/compost/compost tea | How did you apply? (Ex: foliar, fertigation, dry, knifed in, incorporated by tillage) | Application rate (specify units/acre) | Cost per acre | Number times applied from post-harvest to harvest (1 year) | Labor hours for 1 application (per acre) |
|-----------------------------|---------------------------------------------|---------------------------------------------------------------------------------------|---------------------------------------|---------------|------------------------------------------------------------|------------------------------------------|
| Manure/biologics/compost 1  |                                             |                                                                                       |                                       |               |                                                            |                                          |
| Manure/biologics/compost 2  |                                             |                                                                                       |                                       |               |                                                            |                                          |
| Manure/biologics/compost 3  |                                             |                                                                                       |                                       |               |                                                            |                                          |
| Manure/biologics/compost 4  |                                             |                                                                                       |                                       |               |                                                            |                                          |
| Manure/biologics/compost 5  |                                             |                                                                                       |                                       |               |                                                            |                                          |
| Manure/biologics/compost 6  |                                             |                                                                                       |                                       |               |                                                            |                                          |
| Manure/biologics/compost 7  |                                             |                                                                                       |                                       |               |                                                            |                                          |
| Manure/biologics/compost 8  |                                             |                                                                                       |                                       |               |                                                            |                                          |
| Manure/biologics/compost 9  |                                             |                                                                                       |                                       |               |                                                            |                                          |
| Manure/biologics/compost 10 |                                             |                                                                                       |                                       |               |                                                            |                                          |

\* Did you apply herbicides on the field we sampled?

Yes

No

Please complete the table for any applied.

|              | Herbicide name | How did you apply it? (Ex. <i>foliar, preemergent, desiccant</i> ) | Application rate (specify unit/acre) | Cost per acre | Number of times applied post-harvest to harvest (1 year) | Labor hours for 1 application (per acre) | Is this an organic herbicide (OMRI)? <b>Yes/No</b> |
|--------------|----------------|--------------------------------------------------------------------|--------------------------------------|---------------|----------------------------------------------------------|------------------------------------------|----------------------------------------------------|
| Herbicide 1  |                |                                                                    |                                      |               |                                                          |                                          |                                                    |
| Herbicide 2  |                |                                                                    |                                      |               |                                                          |                                          |                                                    |
| Herbicide 3  |                |                                                                    |                                      |               |                                                          |                                          |                                                    |
| Herbicide 4  |                |                                                                    |                                      |               |                                                          |                                          |                                                    |
| Herbicide 5  |                |                                                                    |                                      |               |                                                          |                                          |                                                    |
| Herbicide 6  |                |                                                                    |                                      |               |                                                          |                                          |                                                    |
| Herbicide 7  |                |                                                                    |                                      |               |                                                          |                                          |                                                    |
| Herbicide 8  |                |                                                                    |                                      |               |                                                          |                                          |                                                    |
| Herbicide 9  |                |                                                                    |                                      |               |                                                          |                                          |                                                    |
| Herbicide 10 |                |                                                                    |                                      |               |                                                          |                                          |                                                    |

Did you mow, use burning, or electric zapping on ground cover in your vineyard?

Yes

No

|                       | Number of passes Post-harvest to harvest (1 year) | Labor hours for 1 pass (per acre) |
|-----------------------|---------------------------------------------------|-----------------------------------|
| Mowing                |                                                   |                                   |
| burning weeds         |                                                   |                                   |
| electric weed zapping |                                                   |                                   |

\* Did you apply insecticides, utilize pheromone disruptors, or release beneficial insects on the vineyard we sampled?

Yes

No

Please complete the table for all applied.

|                | Name of<br>Insecticide,<br>Pheromone<br>disruptor,<br>or<br>Beneficial<br>insect<br>released | How did<br>you apply?<br>( <i>Ex: Foliar</i> ) | Application<br>rate ( <i>specify<br/>unit/acre</i> ) | Cost per<br>acre | Number of<br>times<br>applied<br>post-<br>harvest to<br>harvest<br>(1 year) | Labor<br>hours for 1<br>pass<br>( <i>per acre</i> ) | Is this an<br>organic<br>insecticide<br>(OMRI)?<br><b>Yes/No</b> |
|----------------|----------------------------------------------------------------------------------------------|------------------------------------------------|------------------------------------------------------|------------------|-----------------------------------------------------------------------------|-----------------------------------------------------|------------------------------------------------------------------|
| Insecticide 1  |                                                                                              |                                                |                                                      |                  |                                                                             |                                                     |                                                                  |
| Insecticide 2  |                                                                                              |                                                |                                                      |                  |                                                                             |                                                     |                                                                  |
| Insecticide 3  |                                                                                              |                                                |                                                      |                  |                                                                             |                                                     |                                                                  |
| Insecticide 4  |                                                                                              |                                                |                                                      |                  |                                                                             |                                                     |                                                                  |
| Insecticide 5  |                                                                                              |                                                |                                                      |                  |                                                                             |                                                     |                                                                  |
| Insecticide 6  |                                                                                              |                                                |                                                      |                  |                                                                             |                                                     |                                                                  |
| Insecticide 7  |                                                                                              |                                                |                                                      |                  |                                                                             |                                                     |                                                                  |
| Insecticide 8  |                                                                                              |                                                |                                                      |                  |                                                                             |                                                     |                                                                  |
| Insecticide 9  |                                                                                              |                                                |                                                      |                  |                                                                             |                                                     |                                                                  |
| Insecticide 10 |                                                                                              |                                                |                                                      |                  |                                                                             |                                                     |                                                                  |

\* Did you apply fungicides to the field/orchard we sampled?

Yes

No

Please complete the table for all applied.

| Fungicide name | How did you apply it? (Ex: foliar, fertigation, etc.) | Application rate (Specify unit/acre) | Cost per acre | Number of times applied post-harvest (1 year) | Labor hours for 1 pass (per acre) | Is this an organic fungicide? <b>Yes/No</b> |
|----------------|-------------------------------------------------------|--------------------------------------|---------------|-----------------------------------------------|-----------------------------------|---------------------------------------------|
| Fungicide 1    |                                                       |                                      |               |                                               |                                   |                                             |
| Fungicide 2    |                                                       |                                      |               |                                               |                                   |                                             |
| Fungicide 3    |                                                       |                                      |               |                                               |                                   |                                             |
| Fungicide 4    |                                                       |                                      |               |                                               |                                   |                                             |
| Fungicide 5    |                                                       |                                      |               |                                               |                                   |                                             |
| Fungicide 6    |                                                       |                                      |               |                                               |                                   |                                             |
| Fungicide 7    |                                                       |                                      |               |                                               |                                   |                                             |
| Fungicide 8    |                                                       |                                      |               |                                               |                                   |                                             |
| Fungicide 9    |                                                       |                                      |               |                                               |                                   |                                             |
| Fungicide 10   |                                                       |                                      |               |                                               |                                   |                                             |

Did you irrigate the vineyard/block that we sampled?

Yes

No

Please complete the table for all irrigation types.

| Type of irrigation system (Ex: drip, micro spray) | Who is your water supplier? | How much water did you use Post-harvest to harvest (1 year)? (please indicate per acre units) | How much did you spend on the water for the field/orchard we sampled? |
|---------------------------------------------------|-----------------------------|-----------------------------------------------------------------------------------------------|-----------------------------------------------------------------------|
|---------------------------------------------------|-----------------------------|-----------------------------------------------------------------------------------------------|-----------------------------------------------------------------------|

|                   |  |  |  |  |
|-------------------|--|--|--|--|
| Irrigation type 1 |  |  |  |  |
| Irrigation type 2 |  |  |  |  |
| Irrigation type 3 |  |  |  |  |

Please fill out the columns in the table applicable to the vineyard/block in the study.

|                       | Did you do this<br>by hand?<br><b>Yes/No</b> | Did you do this<br>with sheep<br><b>Yes/No</b> | Did you do this<br>mechanically?<br><b>Yes/No</b> | Labor hours for 1<br>pass<br>( <i>per acre</i> ) | Number of<br>passes |
|-----------------------|----------------------------------------------|------------------------------------------------|---------------------------------------------------|--------------------------------------------------|---------------------|
| Pruning               |                                              |                                                |                                                   |                                                  |                     |
| Suckering             |                                              |                                                |                                                   |                                                  |                     |
| Shoot thinning        |                                              |                                                |                                                   |                                                  |                     |
| Leaf thinning         |                                              |                                                |                                                   |                                                  |                     |
| Dropping clusters     |                                              |                                                |                                                   |                                                  |                     |
| Bird or shade netting |                                              |                                                |                                                   |                                                  |                     |

About how many labor hours did you spend on harvesting fruit for your vineyard/block ?

Please provide the per acre amount.

\* Did you graze sheep in this vineyard/block?

Yes

No

How many years have you had sheep grazing in this vineyard/block.

Were insecticides or dewormers applied to the herd/flock?

- Yes
- Yes, but spot treated only
- No
- Not sure

|                         | Insecticide/dewormer name | Dosage per animal | Number of time applied post-harvest to harvest (1 year) | Cost per dose per animal | Was it applied during or immediately prior (<4weeks) to grazing in vineyard?<br><b>Yes/No</b> | Was the insecticide/dewormer organic?<br><b>Yes/No</b> |
|-------------------------|---------------------------|-------------------|---------------------------------------------------------|--------------------------|-----------------------------------------------------------------------------------------------|--------------------------------------------------------|
| Insecticide/dewormer 1  |                           |                   |                                                         |                          |                                                                                               |                                                        |
| Insecticide/dewormer 2  |                           |                   |                                                         |                          |                                                                                               |                                                        |
| Insecticide/dewormer 3  |                           |                   |                                                         |                          |                                                                                               |                                                        |
| Insecticide/dewormer 4  |                           |                   |                                                         |                          |                                                                                               |                                                        |
| Insecticide/dewormer 5  |                           |                   |                                                         |                          |                                                                                               |                                                        |
| Insecticide/dewormer 6  |                           |                   |                                                         |                          |                                                                                               |                                                        |
| Insecticide/dewormer 7  |                           |                   |                                                         |                          |                                                                                               |                                                        |
| Insecticide/dewormer 8  |                           |                   |                                                         |                          |                                                                                               |                                                        |
| Insecticide/dewormer 9  |                           |                   |                                                         |                          |                                                                                               |                                                        |
| Insecticide/dewormer 10 |                           |                   |                                                         |                          |                                                                                               |                                                        |

Contract grazers or own the flock

- Hired a contract grazer

Please describe the grazing events that occurred over the course of the year (post-harvest to harvest).

|                 | Approximate dates | Per acre stocking rate | Per acre cost |
|-----------------|-------------------|------------------------|---------------|
| Grazing event 1 |                   |                        |               |
| Grazing event 2 |                   |                        |               |
| Grazing event 3 |                   |                        |               |
| Grazing event 4 |                   |                        |               |
| Grazing event 5 |                   |                        |               |
| Grazing event 6 |                   |                        |               |
| Grazing event 7 |                   |                        |               |
| Grazing event 8 |                   |                        |               |

Please describe the grazing events that occurred over the course of the year (post-harvest to harvest).

|                 | Approximate dates | Per acre stocking rate |
|-----------------|-------------------|------------------------|
| Grazing event 1 |                   |                        |
| Grazing event 2 |                   |                        |
| Grazing event 3 |                   |                        |
| Grazing event 4 |                   |                        |
| Grazing event 5 |                   |                        |
| Grazing event 6 |                   |                        |
| Grazing event 7 |                   |                        |
| Grazing event 8 |                   |                        |

How was income earned from the flock? Check all that apply.

- selling lambs
- selling wool
- milk products
- grazing contracts (ex: other vineyards wildfire suppression, etc)

What was the gross annual income earned from the flock of sheep that grazed the vineyard?

What were the total variable costs (feed, labor, medications etc. ) from the flock of sheep that grazed the vineyard?

Did the use of grazers reduce the number of tractor and/or ATV passes you need to make in the vineyard?

Number of passes reduced by grazing

Tractor passes

ATV passes

Please indicate the approximate number of per row passes made from post-harvest through the following harvest (1 year).

For example

- 2 tillage passes and 3 mowing passes on a tractor = 5
- 3 herbicides spray on an ATV= 3

Number of passes

Tractor passes

ATV passes

Did you do any soil, leaf, or pest presence testing in the vineyard/block that we sampled?

Yes

No

Please fill out the table for any test performed.

|         | Type of testing | cost of test ( <i>Ex: lab fees, shipping, etc.</i> ) | On farm labor hours to do 1 test (per acre) | Number of times this test was done post-harvest to harvest (1 year) |
|---------|-----------------|------------------------------------------------------|---------------------------------------------|---------------------------------------------------------------------|
| Test 1  |                 |                                                      |                                             |                                                                     |
| Test 2  |                 |                                                      |                                             |                                                                     |
| Test 3  |                 |                                                      |                                             |                                                                     |
| Test 4  |                 |                                                      |                                             |                                                                     |
| Test 5  |                 |                                                      |                                             |                                                                     |
| Test 6  |                 |                                                      |                                             |                                                                     |
| Test 7  |                 |                                                      |                                             |                                                                     |
| Test 8  |                 |                                                      |                                             |                                                                     |
| Test 9  |                 |                                                      |                                             |                                                                     |
| Test 10 |                 |                                                      |                                             |                                                                     |

Did you use any management practices on your field/orchard not mentioned in the survey?

*(Please include cost and labor hours associated with the practice)*

---

---

The next series of questions pertain to the entire farm, not just the field we sampled.

What motivates your management decisions?

*(Select your top 3 choices)*

- Finances
- Expanding the size of your operation
- Well-being of future generations
- Legacy of past generations
- Mental & physical health of you/your family
- Soil health
- Yield
- Environmental stewardship
- Other

Which resources do you find most helpful when you are making management decisions on your farm?

*(Select all that apply)*

- Books/magazines

- Videos/Youtube
- Websites/internet articles
- Online social groups (e.g., Facebook groups)
- Friends, family, neighbors
- Structured mentorship program or peer group
- Local government agencies (USDA, NRCS)
- University extension
- In-person agronomist or consultant
- Remote agronomist or consultant

Are there any specific resources you would like other producers to know about?

*(Ex: person, book, online group)*

Check which economic status is true for your farm.

- The farm is the only income stream for the owner(s).
- The farm is one of two or more income streams for the owner(s).
- The farm is not for profit.
- Other

**Almost done!**

The following page has 4 open-ended questions that are optional. The point of this section is to get advice that can help us do our jobs better as we work with growers. Thank you!

What management practices would you recommend to a future farmer?

What changes to policy, culture, technology, and research would improve your life as a food producer?

Are there any obstacles or aids to your way of farming that you feel we should have asked about in this survey?

Is there anything else you would like us to know about the vineyard we sampled?

Feel free to submit any other documents here. Thanks!

File 0 of 1

Max file size: 10.0 MB

 Press here to [Browse](#)
