# Supplementary material
Source: Research Square preprint supplement (doi:10.21203/rs.3.rs-9350796/v1)
Supplement: Supplementary file 4 [file b64689195ada975b57c74249.xlsx]

## Sheet: 2026-03-05_SlopeInteractions_sp
outcome	response	model_id	interaction	n	edf_total_M0	dev_expl_M0	r2_adj_M0	aic_M0	resid_df_M0	resid_dev_M0	edf_total_M1	dev_expl_M1	r2_adj_M1	aic_M1	resid_df_M1	resid_dev_M1	smooth	edf	ref_df	stat	p_smooth	df_added	deviance_added	p_lrt	delta_aic	delta_r2
PAN	Plant_available_N_0_15cm_kg_ha	M1	clay_farm_mean_mean | by=d_Cg	49	9.073164612570743	0.48118763983820123	0.37628431990362776	367.90713436397454	39.92683538742926	3261.770094624215	13.53013231872757	0.7294395412975633	0.6338609962006188	345.84091483772266	35.46986768127243	1701.0119279120415	ti(clay_farm_mean_mean):d_Cg	4.004535027488882	6	4.741609773321916	1.20102718549564e-4	5.378100878925444	1560.7581667121733	6.896366131566065e-6	-22.0662	0.257577
PAN	Plant_available_N_0_15cm_kg_ha	M1	Ca_sat_0_15cm_mean | by=d_Rg	49	9.073164612570743	0.48118763983820123	0.37628431990362776	367.90713436397454	39.92683538742926	3261.770094624215	9.63439	0.5079750099001386	0.4000549900110799	366.9135961613792	39.365607066603516	3093.3580649755568	ti(Ca_sat_0_15cm_mean):d_Rg	0.6819072293132786	6	0.3389690410305717	0.0720957	1.0428591375764427	168.41202964865806	0.15100608699072077	-0.993538	0.023770670107452152
PAN	Plant_available_N_0_15cm_kg_ha	M1	space | by=d_Cg	49	9.073164612570743	0.48118763983820123	0.37628431990362776	367.90713436397454	39.92683538742926	3261.770094624215	9.072996785126868	0.48118663473369716	0.376286	367.9066252489346	39.92700321487313	3261.776413710006	ti(Longitude_mean,Latitude_mean):d_Cg	1.721007743924603e-5	23	4.669292854112804e-7	0.5103628415957311	-0.000436216	-0.00631909	0.00208801	-0.000509115	1.4133690872109028e-6
PAN	Plant_available_N_0_15cm_kg_ha	M1	space | by=d_Rg	49	9.073164612570743	0.48118763983820123	0.37628431990362776	367.90713436397454	39.92683538742926	3261.770094624215	9.073035139892276	0.48118690189424396	0.37628545529746293	367.90675261005094	39.926964860107724	3261.774734073303	ti(Longitude_mean,Latitude_mean):d_Rg	7.179196252224977e-5	35	1.0496004414472498e-6	0.5715358683310972	-0.000321977	-0.00463945	0.00159127	-0.000381754	1.1353938351721382e-6
PAN	Plant_available_N_0_15cm_kg_ha	M1	clay_farm_mean_mean | by=d_Ru	49	9.073164612570743	0.48118763983820123	0.37628431990362776	367.90713436397454	39.92683538742926	3261.770094624215	9.073043133460116	0.48118686079681117	0.37628528101968517	367.90677568428293	39.92695686653988	3261.774992452609	ti(clay_farm_mean_mean):d_Ru	8.561759117261855e-6	6	7.934537618604227e-7	0.4804115588070281	-0.000310778	-0.00489783	0.00152755	-0.00035868	9.611160574074518e-7
PAN	Plant_available_N_0_15cm_kg_ha	M1	silt_farm_mean_mean | by=d_Ru	49	9.073164612570743	0.48118763983820123	0.37628431990362776	367.90713436397454	39.92683538742926	3261.770094624215	9.073040980310868	0.4811866944333773	0.3762851146535483	367.9067908880195	39.926959019689136	3261.7760383784866	ti(silt_farm_mean_mean):d_Ru	2.6533832950910277e-5	6	4.532084051191157e-7	0.903949	-0.000309134	-0.00594375	0.00148961	-0.000343476	7.947499205407382e-7
PAN	Plant_available_N_0_15cm_kg_ha	M1	silt_farm_mean_mean | by=d_Cg	49	9.073164612570743	0.48118763983820123	0.37628431990362776	367.90713436397454	39.92683538742926	3261.770094624215	9.073045710842218	0.4811866666414687	0.37628500734472614	367.90681540376727	39.926954289157784	3261.776213106044	ti(silt_farm_mean_mean):d_Cg	3.152021333758657e-5	6	6.057379972634683e-7	0.8605341810602232	-0.000291973	-0.00611848	0.00140275	-0.00031896	6.8744109837926e-7
PAN	Plant_available_N_0_15cm_kg_ha	M1	clay_farm_mean_mean | by=cT	49	9.073164612570743	0.48118763983820123	0.37628431990362776	367.90713436397454	39.92683538742926	3261.770094624215	9.073085814898858	0.48118725785186567	0.376285	367.9068868167736	39.92691418510114	3261.7724961699405	ti(clay_farm_mean_mean):cT	1.3959387350340579e-5	6	2.3682223224085302e-7	0.9162617622847546	-0.000204827	-0.00240155	0.00107994	-0.000247547	7.717100112270003e-7
PAN	Plant_available_N_0_15cm_kg_ha	M1	clay_farm_mean_mean | by=d_Rg	49	9.073164612570743	0.48118763983820123	0.37628431990362776	367.90713436397454	39.92683538742926	3261.770094624215	9.07307	0.48118687074392325	0.3762847996210261	367.90689794383434	39.926925284425366	3261.7749299151765	ti(clay_farm_mean_mean):d_Rg	2.0895918558154668e-5	6	3.14269450651946e-7	0.9430331448451319	-0.000219161	-0.00483529	0.00107888	-0.00023642	4.797173983606129e-7
PAN	Plant_available_N_0_15cm_kg_ha	M1	Ca_sat_0_15cm_mean | by=cT	49	9.073164612570743	0.48118763983820123	0.37628431990362776	367.90713436397454	39.92683538742926	3261.770094624215	9.073087826961386	0.48118715183894845	0.37628493273399954	367.9069233364729	39.926912173038616	3261.7731626724944	ti(Ca_sat_0_15cm_mean):cT	9.362867006515242e-5	6	4.461032459512862e-6	0.7240025836993448	-0.000180332	-0.00306805	9.28791837708901e-4	-0.000211028	6.128303717822803e-7
PAN	Plant_available_N_0_15cm_kg_ha	M1	Ca_sat_0_15cm_mean | by=d_Cg	49	9.073164612570743	0.48118763983820123	0.37628431990362776	367.90713436397454	39.92683538742926	3261.770094624215	9.073107421654647	0.48118748275392226	0.3762850244619824	367.9069457558461	39.92689257834535	3261.771082212104	ti(Ca_sat_0_15cm_mean):d_Cg	2.6057273873326976e-5	6	2.474036303092934e-6	0.4732748751573801	-0.000146253	-0.000987588	8.361618257928133e-4	-0.000188608	7.045583546583245e-7
PAN	Plant_available_N_0_15cm_kg_ha	M1	space | by=d_Ru	49	9.073164612570743	0.48118763983820123	0.37628431990362776	367.90713436397454	39.92683538742926	3261.770094624215	9.073094240531569	0.481187	0.3762847108684818	367.90695751782783	39.92690575946843	3261.773798990042	ti(Longitude_mean,Latitude_mean):d_Ru	1.272183135730993e-4	28	1.3511575916630109e-6	0.60439	-0.000162123	-0.00370437	8.197823910270835e-4	-0.000176846	3.909648540467714e-7
PAN	Plant_available_N_0_15cm_kg_ha	M1	Ca_sat_0_15cm_mean | by=d_Ru	49	9.073164612570743	0.48118763983820123	0.37628431990362776	367.90713436397454	39.92683538742926	3261.770094624215	9.07311	0.48118706830807373	0.37628441009306257	367.907	39.92688514476312	3261.7736878305864	ti(Ca_sat_0_15cm_mean):d_Ru	1.0062088814891313e-4	6	2.0486676239661808e-6	0.8031829985427819	-0.000121104	-0.00359321	6.142746099458352e-4	-0.000116882	9.018943480931796e-8
PAN	Plant_available_N_0_15cm_kg_ha	M1	space | by=cT	49	9.073164612570743	0.48118763983820123	0.37628431990362776	367.90713436397454	39.92683538742926	3261.770094624215	9.073610225411255	0.4811992740971709	0.3762913455504806	367.90781289817505	39.92638977458874	3261.6969501101394	ti(Longitude_mean,Latitude_mean):cT	9.16370803201338e-4	48	2.6426486161879777e-5	0.18065049302973346	0.00133175	0.0731445	0.00473988	6.785342005173334e-4	7.025646852842904e-6
PAN	Plant_available_N_0_15cm_kg_ha	M1	silt_farm_mean_mean | by=cT	49	9.073164612570743	0.48118763983820123	0.37628431990362776	367.90713436397454	39.92683538742926	3261.770094624215	9.074123085842945	0.48120730363511655	0.3762929871507831	367.9090255349904	39.92587691415706	3261.646468454813	ti(silt_farm_mean_mean):cT	0.0010832	6	1.9586081072044833e-4	0.2944963678656157	0.00278991	0.12362616940163207	0.00918005	0.00189117	8.667247155313973e-6
PAN	Plant_available_N_0_15cm_kg_ha	M1	silt_farm_mean_mean | by=d_Rg	49	9.073164612570743	0.48118763983820123	0.37628431990362776	367.90713436397454	39.92683538742926	3261.770094624215	9.450302438954054	0.49263815734683947	0.3842337628559189	368.1473590171024	39.549697561045946	3189.780761976089	ti(silt_farm_mean_mean):d_Rg	0.4138243039581615	6	0.0983079	0.21728922547897622	0.9566606952475283	71.98933264812604	0.3299730609042317	0.240225	0.00794944
SOC	RZE_of_Mg_SOC_ha_surface_0_30cm	M1	silt_farm_mean_mean | by=d_Ru	49	14.606800301128452	0.8620108690923908	0.8074189566089554	282.21006718499393	34.39319969887155	433.68440023760076	17.51709482628973	0.90673	0.8577972600036561	268.8676508541271	31.48290517371027	293.13687238016394	ti(silt_farm_mean_mean):d_Ru	0.8871611899677501	6	1.2034390745190144	0.00414147	2.9394837043762365	140.54752785743682	0.00162929	-13.3424	0.0503783
SOC	RZE_of_Mg_SOC_ha_surface_0_30cm	M1	space | by=cT	49	14.606800301128452	0.8620108690923908	0.8074189566089554	282.21006718499393	34.39319969887155	433.68440023760076	16.63402046842423	0.8886087757269752	0.8348025042811092	276.474	32.365979531575775	350.0901554552432	ti(Longitude_mean,Latitude_mean):cT	1.5757324266834767	40	0.28218878069335285	0.0175382	2.7291735170773386	83.59424478235758	0.0418004	-5.7358	0.027383547672153896
SOC	RZE_of_Mg_SOC_ha_surface_0_30cm	M1	silt_farm_mean_mean | by=d_Rg	49	14.606800301128452	0.8620108690923908	0.8074189566089554	282.21006718499393	34.39319969887155	433.68440023760076	15.589110088212914	0.8810741583117526	0.8291443174334012	276.81649154349515	33.41088991178709	373.77061501932627	ti(silt_farm_mean_mean):d_Rg	0.8525336844826655	6	0.9036509810695335	0.011147068022561157	0.9091798082606317	59.913785218274484	0.017759030153401228	-5.39358	0.021725360824445872
SOC	RZE_of_Mg_SOC_ha_surface_0_30cm	M1	clay_farm_mean_mean | by=d_Rg	49	14.606800301128452	0.8620108690923908	0.8074189566089554	282.21006718499393	34.39319969887155	433.68440023760076	15.757864301322513	0.8808590299693008	0.827966	277.9606015184449	33.24213569867749	374.4467393311228	ti(clay_farm_mean_mean):d_Rg	1.403510902923685	6	0.8858165882256874	0.019257457342019446	1.7959781473059948	59.23766090647797	0.059283	-4.24947	0.020547374636690652
SOC	RZE_of_Mg_SOC_ha_surface_0_30cm	M1	silt_farm_mean_mean | by=cT	49	14.606800301128452	0.8620108690923908	0.8074189566089554	282.21006718499393	34.39319969887155	433.68440023760076	15.057795267190873	0.8671652577692334	0.8121492791270104	281.5394566813297	33.94220473280913	417.4847332985814	ti(silt_farm_mean_mean):cT	0.47393869985894077	6	0.14613539507224468	0.153238	0.7437806510297413	16.19966693901938	0.18078892553249915	-0.670611	0.00473032
SOC	RZE_of_Mg_SOC_ha_surface_0_30cm	M1	Ca_sat_0_15cm_mean | by=d_Rg	49	14.606800301128452	0.8620108690923908	0.8074189566089554	282.21006718499393	34.39319969887155	433.68440023760076	15.17959698345103	0.8679423216513638	0.8125756053932043	281.6896781165857	33.82040301654897	415.0425084548461	ti(Ca_sat_0_15cm_mean):d_Rg	0.6242603220818708	6	0.28048115377502286	0.0747467	1.0596849221514404	18.64189178275467	0.23273371294364154	-0.520389	0.00515665
SOC	RZE_of_Mg_SOC_ha_surface_0_30cm	M1	silt_farm_mean_mean | by=d_Cg	49	14.606800301128452	0.8620108690923908	0.8074189566089554	282.21006718499393	34.39319969887155	433.68440023760076	14.606272009630906	0.862007	0.8074166361686481	282.20979740199283	34.393727990369094	433.6962873948007	ti(silt_farm_mean_mean):d_Cg	5.1493700934402225e-6	6	4.7404856279497e-8	0.9186383646136836	-0.00108455	-0.0118872	0.00383389	-0.000269783	-2.32044e-06
SOC	RZE_of_Mg_SOC_ha_surface_0_30cm	M1	space | by=d_Cg	49	14.606800301128452	0.8620108690923908	0.8074189566089554	282.21006718499393	34.39319969887155	433.68440023760076	14.606323022456602	0.8620074570090942	0.8074168671210047	282.20980393418284	34.3937	433.6951240336583	ti(Longitude_mean,Latitude_mean):d_Cg	1.9829610221647917e-6	35	1.6372052396257054e-8	0.7421203002508358	-0.000997589	-0.0107238	0.00357818	-0.000263251	-2.08949e-06
SOC	RZE_of_Mg_SOC_ha_surface_0_30cm	M1	Ca_sat_0_15cm_mean | by=cT	49	14.606800301128452	0.8620108690923908	0.8074189566089554	282.21006718499393	34.39319969887155	433.68440023760076	14.606598175370548	0.8620095363083558	0.8074182283284423	282.20996204771154	34.39340182462945	433.6885890287109	ti(Ca_sat_0_15cm_mean):cT	1.2655948317624762e-4	6	1.8935002520250905e-5	0.3194204293894637	-0.000376281	-0.00418879	0.00152767	-0.000105137	-7.28281e-07
SOC	RZE_of_Mg_SOC_ha_surface_0_30cm	M1	clay_farm_mean_mean | by=cT	49	14.606800301128452	0.8620108690923908	0.8074189566089554	282.21006718499393	34.39319969887155	433.68440023760076	14.60651105010469	0.8620086741168775	0.8074175128891645	282.20996601017924	34.393488949895314	433.691	ti(clay_farm_mean_mean):cT	3.637488976006147e-5	6	1.8942602787661258e-6	0.6834173380662817	-0.000591354	-0.00689856	0.00225269	-0.000101175	-1.44372e-06
SOC	RZE_of_Mg_SOC_ha_surface_0_30cm	M1	Ca_sat_0_15cm_mean | by=d_Cg	49	14.606800301128452	0.8620108690923908	0.8074189566089554	282.21006718499393	34.39319969887155	433.68440023760076	14.606633707224104	0.8620096224010215	0.8074181495243111	282.2100274174797	34.393366292775895	433.68831844909454	ti(Ca_sat_0_15cm_mean):d_Cg	1.9001195759900382e-5	6	1.0455072747413316e-6	0.5875884316423332	-0.000315872	-0.00391821	0.0012931	-3.97675e-05	-8.07085e-07
SOC	RZE_of_Mg_SOC_ha_surface_0_30cm	M1	clay_farm_mean_mean | by=d_Cg	49	14.606800301128452	0.8620108690923908	0.8074189566089554	282.21006718499393	34.39319969887155	433.68440023760076	14.606674702439605	0.8620098808933492	0.8074182807328298	282.2100558848376	34.393325297560395	433.6875060366285	ti(clay_farm_mean_mean):d_Cg	3.2583293823462884e-5	6	9.43919414594961e-7	0.8071255050566379	-0.00023661	-0.0031058	9.962347196049211e-4	-1.13002e-05	-6.75876e-07
SOC	RZE_of_Mg_SOC_ha_surface_0_30cm	M1	clay_farm_mean_mean | by=d_Ru	49	14.606800301128452	0.8620108690923908	0.8074189566089554	282.21006718499393	34.39319969887155	433.68440023760076	14.607179634086146	0.8620135524056167	0.8074205774907982	282.2103499192367	34.392820365913856	433.67596688434037	ti(clay_farm_mean_mean):d_Ru	1.2945297629519031e-4	6	2.3637547253370743e-5	0.2508679514081804	8.562562354157421e-4	0.00843335	0.0031745	2.827342427735857e-4	1.6208818428564697e-6
SOC	RZE_of_Mg_SOC_ha_surface_0_30cm	M1	space | by=d_Rg	49	14.606800301128452	0.8620108690923908	0.8074189566089554	282.21006718499393	34.39319969887155	433.68440023760076	14.925391493055445	0.8635164186299213	0.8077391878345836	282.36640914715383	34.07460850694456	428.9526264818171	ti(Longitude_mean,Latitude_mean):d_Rg	1.3144470643231156	28	0.13552659013468943	0.0906108	0.37530998055103737	4.7317737557836494	0.22943599370885256	0.1563419621598996	3.20231225628298e-4
SOC	RZE_of_Mg_SOC_ha_surface_0_30cm	M1	space | by=d_Ru	49	14.606800301128452	0.8620108690923908	0.8074189566089554	282.21006718499393	34.39319969887155	433.68440023760076	13.584536895008325	0.848738	0.7949882294345119	283.9771683725547	35.41546310499167	475.40024975221473	ti(Longitude_mean,Latitude_mean):d_Ru	1.2099637186228438e-4	31	2.939032124502121e-7	0.8486691034838614	-1.7108	-41.7158	0.15134680434907066	1.7671011875607405	-0.0124307
SOC	RZE_of_Mg_SOC_ha_surface_0_30cm	M1	Ca_sat_0_15cm_mean | by=d_Ru	49	14.606800301128452	0.8620108690923908	0.8074189566089554	282.21006718499393	34.39319969887155	433.68440023760076	11.284555956134946	0.7970158925059774	0.741665	293.27314114776175	37.715444043865055	637.9563400196433	ti(Ca_sat_0_15cm_mean):d_Ru	1.2524232792907515	6	1.2675079052665672	0.00554764	-4.52637	-204.272	0.00433525	11.063073962767817	-0.0657544
TSN	RZE_of_Mg_TSN_ha_surface_0_30cm	M1	space | by=cT	49	13.856513366570642	0.8585347095090079	0.8067825764018393	20.036514165779927	35.14348663342936	2.18765	16.36759525327089	0.9077249550302445	0.8642698203541919	4.788729437687579	32.63240474672911	1.4269605017504448	ti(Longitude_mean,Latitude_mean):cT	1.9619670029169765	35	1.0652469340953707	5.214830071036403e-4	3.177885423796006	0.7606881953102052	7.122221091742986e-4	-15.2478	0.0574872
TSN	RZE_of_Mg_TSN_ha_surface_0_30cm	M1	clay_farm_mean_mean | by=d_Rg	49	13.856513366570642	0.8585347095090079	0.8067825764018393	20.036514165779927	35.14348663342936	2.18765	16.14454405981229	0.8958856381494426	0.847895	10.489522773140518	32.85545594018771	1.6100461622575626	ti(clay_farm_mean_mean):d_Rg	1.645072512969746	6	1.2544483155279598	0.00858166	3.186636549352354	0.5776025348030873	0.00968801	-9.54699	0.041112111837321774
TSN	RZE_of_Mg_TSN_ha_surface_0_30cm	M1	silt_farm_mean_mean | by=d_Rg	49	13.856513366570642	0.8585347095090079	0.8067825764018393	20.036514165779927	35.14348663342936	2.18765	15.303224222088755	0.877852	0.8260045357450461	16.44012621064067	33.69677577791124	1.8889163439199166	ti(silt_farm_mean_mean):d_Rg	0.9953373818993888	6	0.940752	0.010399296017012505	2.1512777336221873	0.2987323531407333	0.079711	-3.59639	0.019221959343206807
TSN	RZE_of_Mg_TSN_ha_surface_0_30cm	M1	Ca_sat_0_15cm_mean | by=cT	49	13.856513366570642	0.8585347095090079	0.8067825764018393	20.036514165779927	35.14348663342936	2.18765	14.693792339251862	0.8719200832534825	0.8207952314453293	17.222166643397042	34.306207660748136	1.9806544914139004	ti(Ca_sat_0_15cm_mean):cT	1.1309702618140263	6	0.531044	0.049331	1.2189721051514049	0.20699420564674953	0.0780061	-2.81435	0.0140127
TSN	RZE_of_Mg_TSN_ha_surface_0_30cm	M1	space | by=d_Rg	49	13.856513366570642	0.8585347095090079	0.8067825764018393	20.036514165779927	35.14348663342936	2.18765	15.847996195553858	0.8798208817143992	0.8259955050760704	17.60821566471992	33.15200380444614	1.8584748995240887	ti(Longitude_mean,Latitude_mean):d_Rg	2.0408598657701886	29	0.39339016490824164	0.027248505036383985	3.5707029544031315	0.3291737975365612	0.1670485253484317	-2.4283	0.0192129
TSN	RZE_of_Mg_TSN_ha_surface_0_30cm	M1	Ca_sat_0_15cm_mean | by=d_Rg	49	13.856513366570642	0.8585347095090079	0.8067825764018393	20.036514165779927	35.14348663342936	2.18765	14.231968795332962	0.8665247400286986	0.8157269118602707	18.2218	34.76803120466704	2.064089202040993	ti(Ca_sat_0_15cm_mean):d_Rg	0.7933276781901778	6	0.6039120791585729	0.028604678526401583	0.6585564611918961	0.12355949501965702	0.0889808	-1.81476	0.00894434
TSN	RZE_of_Mg_TSN_ha_surface_0_30cm	M1	silt_farm_mean_mean | by=d_Ru	49	13.856513366570642	0.8585347095090079	0.8067825764018393	20.036514165779927	35.14348663342936	2.18765	14.165121003956026	0.8624882853843527	0.8105185810376818	19.60764805558642	34.834878996043976	2.126509776818025	ti(silt_farm_mean_mean):d_Ru	0.6011008916280784	5	0.30555729584460883	0.10061664509743873	0.6514449443629893	0.061138920242624906	0.20281827870397817	-0.428866	0.003736
TSN	RZE_of_Mg_TSN_ha_surface_0_30cm	M1	clay_farm_mean_mean | by=d_Ru	49	13.856513366570642	0.8585347095090079	0.8067825764018393	20.036514165779927	35.14348663342936	2.18765	13.85659443382379	0.8585356413982942	0.8067834035009628	20.036449380010236	35.14340556617621	2.187634286130763	ti(clay_farm_mean_mean):d_Ru	6.71027144091339e-5	6	1.3956451521471863e-5	0.233013	1.7693092835813218e-4	1.4410929886743418e-5	7.505270288413399e-4	-6.47858e-05	8.270991235237446e-7
TSN	RZE_of_Mg_TSN_ha_surface_0_30cm	M1	Ca_sat_0_15cm_mean | by=d_Ru	49	13.856513366570642	0.8585347095090079	0.8067825764018393	20.036514165779927	35.14348663342936	2.18765	13.85651263159815	0.8585347134178001	0.8067825857814296	20.03650806886582	35.14348736840185	2.1876486366142758	ti(Ca_sat_0_15cm_mean):d_Ru	8.670324881431536e-6	6	3.8769956181463146e-7	0.6420173600611938	-4.00803e-06	6.044637412827569e-8	NA	-6.09691e-06	9.379590326652476e-9
TSN	RZE_of_Mg_TSN_ha_surface_0_30cm	M1	clay_farm_mean_mean | by=d_Cg	49	13.856513366570642	0.8585347095090079	0.8067825764018393	20.036514165779927	35.14348663342936	2.18765	13.856514469379317	0.8585347214767587	0.8067825866845467	20.036513946802714	35.14348553062068	2.1876485119888622	ti(clay_farm_mean_mean):d_Cg	9.598250879573306e-7	6	6.177345392671438e-8	0.6332006779627238	2.8235405586940487e-6	1.8507178767279697e-7	1.812956958782347e-5	-2.18977e-07	1.0282707463282748e-8
TSN	RZE_of_Mg_TSN_ha_surface_0_30cm	M1	Ca_sat_0_15cm_mean | by=d_Cg	49	13.856513366570642	0.8585347095090079	0.8067825764018393	20.036514165779927	35.14348663342936	2.18765	13.85651769985527	0.8585347357250674	0.8067825883842821	20.03652127460399	35.143482300144726	2.187648291650049	ti(Ca_sat_0_15cm_mean):d_Cg	8.351551891693925e-7	6	1.8751665042911486e-7	0.22156407826044822	1.1856120483599852e-5	4.05410601089784e-7	7.147617625085364e-5	7.108824064516739e-6	1.1982442815750005e-8
TSN	RZE_of_Mg_TSN_ha_surface_0_30cm	M1	space | by=d_Cg	49	13.856513366570642	0.8585347095090079	0.8067825764018393	20.036514165779927	35.14348663342936	2.18765	13.856517309670098	0.8585347226717722	0.806783	20.036524619352154	35.143482690329904	2.1876484935089247	ti(Longitude_mean,Latitude_mean):d_Cg	7.241795134666231e-7	36	1.4157202560960444e-8	0.47643147337833314	1.1069721711720604e-5	2.035517252529928e-7	7.054856402866403e-5	1.0453572226509777e-5	-3.70091e-09
TSN	RZE_of_Mg_TSN_ha_surface_0_30cm	M1	silt_farm_mean_mean | by=d_Cg	49	13.856513366570642	0.8585347095090079	0.8067825764018393	20.036514165779927	35.14348663342936	2.18765	13.856525168259594	0.8585347328142309	0.8067825433475883	20.036551216804014	35.143474831740406	2.1876483366638317	ti(silt_farm_mean_mean):d_Cg	9.710907457925542e-7	6	4.078999216410635e-8	0.7002337346114141	3.3321675804387496e-5	3.6039681816646407e-7	2.028317333090343e-4	3.705102408702032e-5	-3.30543e-08
TSN	RZE_of_Mg_TSN_ha_surface_0_30cm	M1	silt_farm_mean_mean | by=cT	49	13.856513366570642	0.8585347095090079	0.8067825764018393	20.036514165779927	35.14348663342936	2.18765	13.919051170641968	0.8574550107551447	0.8049608202721389	20.92457974356615	35.080948829358036	2.2043453833213507	ti(silt_farm_mean_mean):cT	0.5614161339955942	6	0.20611171152862817	0.1270307727692721	0.4529673589422707	-0.0166967	NA	0.8880655777862216	-0.00182176
TSN	RZE_of_Mg_TSN_ha_surface_0_30cm	M1	clay_farm_mean_mean | by=cT	49	13.856513366570642	0.8585347095090079	0.8067825764018393	20.036514165779927	35.14348663342936	2.18765	13.49035656803132	0.8527185106430182	0.8009129124971563	21.293172872049386	35.509643431968684	2.2775916069212023	ti(clay_farm_mean_mean):cT	2.660061556797229e-6	6	1.4919256895166314e-7	0.6719080513577536	-0.351456	-0.0899429	0.0707783	1.2566587062694587	-0.00586966
TSN	RZE_of_Mg_TSN_ha_surface_0_30cm	M1	space | by=d_Ru	49	13.856513366570642	0.8585347095090079	0.8067825764018393	20.036514165779927	35.14348663342936	2.18765	13.54133365602833	0.8505090868701158	0.7976358230558674	21.68926270513995	35.45866634397167	2.3117585960198634	ti(Longitude_mean,Latitude_mean):d_Ru	2.0845849591989605e-6	40	5.165151026493081e-9	0.8144153036340338	-0.735951	-0.12411	0.10837668011076824	1.6527485393600223	-0.00914675
